# Supplementary material for: Epigenetic Landscapes of Single-Cell Chromatin Accessibility and Transcriptomic Immune Profiles of T Cells in COVID-19 Patients
Source: Front Immunol. 2021 Feb 24;12:625881. doi: 10.3389/fimmu.2021.625881 (PMC7943924; doi:10.3389/fimmu.2021.625881)
Supplement: Supplementary file 8 [file Table_8.XLS]

Feature	pct.1	pct.2	HCs_Mean_Counts	MPs_Mean_Counts	log2FC(MPs_Mean_Counts/HCs_Mean_Counts)	Pvalue	AdjustPvalue	gene	distance	peak_type
chr4:186201548-186205074:CYP4V2	0.19	0.06	2.24204372078901	0.616009309773811	-1.00446803711342	0	0	CYP4V2	10029	distal
chr4:184963655-184969133:HELT	0.053	0.166	0.738936577532805	2.376976433126	0.957526795604633	0	0	HELT	-49708	distal
chr6:137715256-137716494:TNFAIP3	0.15	0.052	2.16972673469291	0.762933157828207	-0.846380694092125	6.81435101370081e-319	1.94447506175953e-314	TNFAIP3	-150694	distal
chr14:24631503-24634923:GZMB	0.137	0.045	2.29288874768511	0.743666284461652	-0.917229817336875	6.43037684972744e-314	1.83490803406973e-309	GZMB	0	promoter
chr8:144877961-144879786:ZNF250	0.252	0.127	2.02596535601243	0.976267337333545	-0.614617351304752	1.2539647591504e-312	3.57818844023567e-308	ZNF250	21645	distal
chr16:81519305-81525044:CMIP	0.262	0.14	2.01616810918226	0.980523876070159	-0.606834747257019	4.19079927539987e-300	1.19584457323535e-295	CMIP	23957	distal
chr1:114340842-114343038:TRIM33	0.145	0.052	2.27586587249606	0.793825314472115	-0.868836883096206	5.97128850788025e-297	1.70390717572363e-292	TRIM33	168122	distal
chr8:66532874-66536435:C8orf46	0.235	0.118	2.06871831887916	0.968884452565644	-0.640257778637238	1.13844815943135e-294	3.24856182293735e-290	C8orf46	39248	distal
chr14:75249005-75250405:FOS	0.216	0.105	2.12138067313469	0.937081695942891	-0.688299513711215	5.10273313484195e-292	1.45606490002715e-287	FOS	-28369	distal
chr15:39623191-39625688:FSIP1	0.167	0.068	2.18313236720205	0.86627128430489	-0.770288437183523	7.61457319023318e-287	2.17281845983304e-282	FSIP1	0	distal
chr15:39623191-39625688:THBS1	0.167	0.068	2.18313236720205	0.86627128430489	-0.770288437183523	7.61457319023318e-287	2.17281845983304e-282	THBS1	42099	distal
chr2:7743629-7745476	0.093	0.023	2.45529111498922	0.61081990376563	-1.10101206172253	1.27883236080236e-280	3.64914814154954e-276	---	---	intergenic
chr17:36066180-36067356:CCL18	0.104	0.029	2.31452367164876	0.650898958306861	-1.00554973215115	1.80315838476773e-276	5.14531245093471e-272	CCL18	1901	distal
chr17:16997386-16998030:TNFRSF13B	0.045	0.003	2.62486234746863	0.188997936112166	-1.60817999964178	1.19117885897145e-271	3.39902887407503e-267	TNFRSF13B	-25269	distal
chr7:38231962-38234175:TRGC2	0.182	0.082	2.13533091952378	0.919187155857616	-0.70812231322885	1.36724315742704e-266	3.90142834971805e-262	TRGC2	15397	distal
chr1:1098747-1100091:C1orf159	0.062	0.01	2.8894578683347	0.416128242598016	-1.45761715954486	2.29184935622212e-264	6.53979213797983e-260	C1orf159	6036	distal
chr7:150667854-150669169:GIMAP2	0.125	0.044	2.31112944845165	0.797996068483047	-0.880933547689134	1.04158304418096e-259	2.97215721657036e-255	GIMAP2	-16531	distal
chr12:31896060-31898267:KIAA1551	0.177	0.081	2.06203724914457	0.883744533032502	-0.70088850820876	6.11595986747532e-257	1.74518914818408e-252	KIAA1551	-61152	distal
chr12:12379511-12380717:BORCS5	0.134	0.05	2.14259504861111	0.81877673006343	-0.788987928924815	2.6359980177552e-255	7.52182034366446e-251	BORCS5	22094	distal
chr5:138565053-138566343:HSPA9	0.106	0.035	2.28955071979504	0.765619753536572	-0.897715881519965	4.61064794782512e-236	1.3156483919119e-231	HSPA9	9101	distal
chr9:95724197-95725402:ERCC6L2	0.129	0.051	2.23403292791014	0.855032577262149	-0.801889844914156	2.17286054759184e-233	6.20025757255331e-229	ERCC6L2	-150299	distal
chr17:2265721-2267345:SMG6	0.176	0.084	2.1385649790761	0.978454725461545	-0.665731026612296	5.47508153312691e-232	1.56231451547776e-227	SMG6	0	promoter
chr12:52645000-52646411:KRT2	0.128	0.05	2.34634061521369	0.868659643370434	-0.840580479648529	1.28215945200413e-231	3.65864199629378e-227	KRT2	5753	distal
chr17:81118809-81120295:AATK	0.079	0.17	0.955541058598449	2.00357114641215	0.619111010524577	2.65604197080225e-231	7.57901576368423e-227	AATK	11653	distal
chr14:101710142-101714185:PPP2R5C	0.168	0.079	2.10434036003666	0.900109554996661	-0.708204140644538	3.25047658763887e-230	9.27523494282752e-226	PPP2R5C	-47613	distal
chr12:52566187-52568021:KRT74	0.142	0.059	2.21210449456378	0.89804288344105	-0.759006238381645	2.26391722689448e-229	6.46008780694339e-225	KRT74	5795	distal
chr1:202197300-202199639:LGR6	0.115	0.042	2.24980741769268	0.810350858239767	-0.844084898671909	8.70239239712077e-229	2.48322767051841e-224	LGR6	3400	distal
chr6:33904050-33905930:MLN	0.157	0.072	2.15866802562767	0.913186015940109	-0.723339167173638	5.9244223989128e-228	1.69053393152977e-223	MLN	-100040	distal
chr7:102671218-102672106:POLR2J2	0.018	0.074	0.640290232396265	2.35872160412679	1.03396111181322	2.72604219438035e-224	7.77876140166434e-220	POLR2J2	0	promoter
chr7:102671218-102672106:RP11-577H5.5	0.018	0.074	0.640290232396265	2.35872160412679	1.03396111181322	2.72604219438035e-224	7.77876140166434e-220	RP11-577H5.5	0	promoter
chr16:50337268-50339609:BRD7	0.073	0.018	1.89592034709742	0.461095663722425	-0.986971281139548	1.10975957768511e-223	3.16669895492448e-219	BRD7	29170	distal
chr7:132429986-132431965:PLXNA4	0.104	0.036	2.34334310277471	0.791661515741472	-0.899993309440054	2.80601954701327e-222	8.00697677740236e-218	PLXNA4	144505	distal
chr5:59098839-59100092:PDE4D	0.102	0.034	2.30001897138572	0.795633896307901	-0.877981082884301	8.65621913581465e-221	2.47005213040471e-216	PDE4D	-59328	distal
chr18:48813649-48816041:CTIF	0.143	0.061	2.11168530751313	0.885855420315085	-0.72247708876369	1.16641997924681e-220	3.32837941078077e-216	CTIF	0	distal
chr18:48813649-48816041:SMAD7	0.143	0.061	2.11168530751313	0.885855420315085	-0.72247708876369	1.16641997924681e-220	3.32837941078077e-216	SMAD7	133292	distal
chr12:124437389-124440088:NCOR2	0.038	0.105	0.767242522505579	2.19862276991922	0.855950820388773	6.31089178263559e-219	1.80081297017507e-214	NCOR2	-14836	distal
chr17:49714895-49716572:FAM117A	0.14	0.059	2.13931731707746	0.911793700817328	-0.715524009189696	4.51512272844374e-218	1.28839027056142e-213	FAM117A	0	distal
chr17:49714895-49716572:SLC35B1	0.14	0.059	2.13931731707746	0.911793700817328	-0.715524009189696	4.51512272844374e-218	1.28839027056142e-213	SLC35B1	-6697	distal
chr11:73994866-73996658:UCP2	0.124	0.049	2.14405874980249	0.824835772980992	-0.784861542247306	1.03975302037704e-217	2.96693524364589e-213	UCP2	-11560	distal
chr2:241619251-241620924:THAP4	0.007	0.046	0.286456779056473	2.33031748439667	1.37225673041381	3.23950494729149e-217	9.24392736709628e-213	THAP4	-1751	distal
chr17:36103096-36108845:CCL4	0.157	0.072	1.95564945141056	0.883705800312634	-0.649901511311525	2.96506353185461e-215	8.46080878814714e-211	CCL4	0	promoter
chr11:130388543-130390321:ADAMTS8	0.077	0.021	2.44249439707125	0.656348053523682	-1.05544844361237	2.79997875981665e-212	7.9897393911368e-208	ADAMTS8	38672	distal
chr20:35250637-35252889:MMP24	0.108	0.039	2.19958865840171	0.797251700452852	-0.832093974334352	9.86597961205781e-212	2.8152572823007e-207	MMP24	23984	distal
chr6:24948313-24952618:RIPOR2	0.161	0.076	1.97707835709348	0.911887425422683	-0.638899616059633	1.62164043415527e-209	4.62735097886205e-205	RIPOR2	-12262	distal
chr16:81576577-81578579:CMIP	0.057	0.011	2.55553775384612	0.496852284793129	-1.24813591769257	6.08859070819074e-209	1.73737935858223e-204	CMIP	-28369	distal
chr1:169691981-169695282:SELL	0.16	0.077	2.08407823535556	0.955126413930338	-0.657577471426982	5.55071770083845e-207	1.58389729593425e-202	SELL	16416	distal
chr12:121557287-121558510:KDM2B	0.137	0.06	2.12630213513172	0.893392035392113	-0.72348405290233	2.80312521776121e-206	7.9987178088816e-202	KDM2B	-19672	distal
chr5:142929352-142930316:ARHGAP26	0.049	0.008	2.70237251632217	0.411390939207964	-1.39133240671928	8.98944437217108e-206	2.56513795159902e-201	ARHGAP26	54460	distal
chr19:50657812-50659440:C19orf81	0.052	0.124	0.899600001251899	2.14656144083704	0.72808045148312	1.91222170821431e-205	5.45652464438952e-201	C19orf81	8368	distal
chr10:114539967-114542145:ABLIM1	0.201	0.11	2.07945943902185	1.04069015548005	-0.593619975900873	1.63817768334098e-204	4.67454001941348e-200	ABLIM1	-13037	distal
chr6:152565826-152566836:SYNE1	0.052	0.009	2.43371374655219	0.405715514025592	-1.28846511915066	2.29398564426029e-204	6.54588803589673e-200	SYNE1	61495	distal
chr7:75727593-75728689:HIP1	0.082	0.025	2.30958653395537	0.683148226053879	-0.975488759797472	2.63629624288004e-203	7.5226713290582e-199	HIP1	10252	distal
chr18:22342535-22346839:CTAGE1	0.099	0.035	2.17081788622318	0.751551650834979	-0.856221487760937	3.15186930191813e-203	8.99385905302339e-199	CTAGE1	68028	distal
chr17:78816781-78819821:USP36	0.175	0.09	2.08832960055561	0.978179149637836	-0.642653645128862	4.49923641759703e-203	1.28385711176131e-198	USP36	16542	distal
chr18:22391421-22392227:CTAGE1	0.05	0.008	2.68076559141577	0.452458557228123	-1.34150887496887	1.21974900573229e-202	3.48055378785708e-198	CTAGE1	22640	distal
chr6:158686418-158688045:SYTL3	0.132	0.057	2.0937685375308	0.877538547008302	-0.72052273712993	2.93427574218466e-202	8.37295583032393e-198	SYTL3	25100	distal
chr5:143008494-143010273:ARHGAP26	0.175	0.088	1.97421757657773	0.963594486225978	-0.599013169752399	3.02891153589302e-200	8.64299906767074e-196	ARHGAP26	133602	distal
chr10:62183228-62184612:RTKN2	0.082	0.026	2.57564057806795	0.753188904870316	-1.0282202708446	2.97717090348169e-199	8.49535717308499e-195	RTKN2	51651	distal
chr20:24957535-24961816:CST7	0.137	0.06	2.07837986852021	0.92170464249391	-0.679784652251499	8.19800753316815e-199	2.33930144958953e-194	CST7	8306	distal
chr17:36081670-36084179:CCL3	0.139	0.061	1.99593669773043	0.873689871505316	-0.677124959417961	3.81944286731886e-198	1.08987802218944e-193	CCL3	5962	distal
chr3:28326250-28327116:AZI2	0.07	0.018	2.31046454131188	0.645496848811311	-1.00851041393371	2.17860599215059e-196	6.21665219860171e-192	AZI2	21513	distal
chr14:22560400-22562877:TRAC	0.173	0.09	2.0937379041535	0.99465166149084	-0.633214157888697	6.28595884053566e-196	1.79369835514685e-191	TRAC	12895	distal
chr1:10524898-10525905:PEX14	0.077	0.022	2.34236583133652	0.709770966758018	-0.967066567965605	7.32620167810764e-196	2.09053164884801e-191	PEX14	50012	distal
chr12:128794515-128798948:SLC15A4	0.147	0.068	2.05007808363983	0.932424153229423	-0.658434386781422	1.02267261275035e-195	2.91819630048312e-191	SLC15A4	25035	distal
chr14:52351765-52353038:PTGER2	0.062	0.014	2.4556978015089	0.606742401089707	-1.10483841096451	4.75579204782833e-195	1.35706526084781e-190	PTGER2	37371	distal
chr3:105752420-105754579:CBLB	0.12	0.049	2.11240636109621	0.87482469443702	-0.731274730699134	1.0717729885713e-194	3.0583042228882e-190	CBLB	113802	distal
chr9:73151482-73156622:ANXA1	0.135	0.058	1.96818844063203	0.896647809246193	-0.646130878996171	8.03564626667603e-194	2.292971662196e-189	ANXA1	0	promoter
chr15:65818397-65820103:DENND4A	0.151	0.07	1.93912449362548	0.943914457542841	-0.596421734898578	6.62043986229255e-192	1.88914251470518e-187	DENND4A	-26274	distal
chr6:73422069-73423074:MB21D1	0.096	0.034	2.21647957826178	0.798841531703547	-0.838414430416544	2.2035315913225e-191	6.28777739583876e-187	MB21D1	0	distal
chr6:73422069-73423074:OOEP	0.096	0.034	2.21647957826178	0.798841531703547	-0.838414430416544	2.2035315913225e-191	6.28777739583876e-187	OOEP	-26977	distal
chr1:8182015-8183198:SLC45A1	0.078	0.024	2.29760489729706	0.682694120968655	-0.97064560420364	5.30763804324742e-191	1.51453451564065e-186	SLC45A1	-134628	distal
chr1:236415731-236417881:EDARADD	0.112	0.045	2.12612215176716	0.841913717838397	-0.763168670321977	7.91109059716806e-190	2.25742970190191e-185	EDARADD	20316	distal
chr19:10522948-10523833:S1PR5	0.07	0.019	2.34564520134056	0.664930747950272	-1.006822288414	1.27256085839938e-189	3.63125240944263e-185	S1PR5	-5018	distal
chr6:130131460-130133208:L3MBTL3	0.093	0.034	2.30301758346955	0.779536591653905	-0.892283051252844	1.45356178639629e-189	4.14773855748182e-185	L3MBTL3	0	distal
chr6:130131460-130133208:SAMD3	0.093	0.034	2.30301758346955	0.779536591653905	-0.892283051252844	1.45356178639629e-189	4.14773855748182e-185	SAMD3	82082	distal
chr9:7976049-7977851:TMEM261	0.143	0.066	1.9880839956614	0.926094097326628	-0.633542516883366	3.05723429709413e-189	8.72381806675809e-185	TMEM261	-175983	distal
chr4:81490617-81492644:RASGEF1B	0.123	0.052	2.03026951402743	0.888805430124578	-0.681972019298223	7.03135538022787e-188	2.00639725774802e-183	RASGEF1B	-18703	distal
chr14:75246987-75248276:FOS	0.108	0.044	2.19388505511239	0.843233451670523	-0.793073587775725	5.91603404849545e-187	1.68814031573818e-182	FOS	-30498	distal
chr17:67452433-67453534:PITPNC1	0.079	0.025	2.34048320582326	0.750090475560447	-0.932627297834865	4.10481780874858e-186	1.17130976172641e-181	PITPNC1	74279	distal
chr10:72369882-72370925:DNAJB12	0.085	0.028	2.24399305542707	0.72813837356109	-0.908551991122833	4.36622920402491e-186	1.24590350336851e-181	DNAJB12	-14653	distal
chr10:72369882-72370925:MICU1	0.085	0.028	2.24399305542707	0.72813837356109	-0.908551991122833	4.36622920402491e-186	1.24590350336851e-181	MICU1	0	distal
chr14:55336176-55338485:FBXO34	0.121	0.051	2.0777288497099	0.887336355172159	-0.70551457627453	4.69884134549399e-186	1.34081437793671e-181	FBXO34	64023	distal
chr8:19474842-19476145:CSGALNACT1	0.098	0.037	2.14363927147223	0.767915518059788	-0.830386344227228	6.98437917591252e-186	1.99299259784664e-181	CSGALNACT1	125720	distal
chr17:74852106-74853074:GRIN2C	0.019	0.068	0.686312034705713	2.38246214465053	1.00420227127965	7.02783909671061e-186	2.00539388624637e-181	GRIN2C	6801	distal
chr1:172670284-172671318:FASLG	0.07	0.02	2.44284641961535	0.658086150076707	-1.05408285814448	9.42940784693658e-186	2.69068152912335e-181	FASLG	11141	distal
chr6:40477144-40478425:LRFN2	0.106	0.042	2.20464741021616	0.864048435904751	-0.781726285919256	5.84873013654081e-185	1.66893514446192e-180	LRFN2	109040	distal
chr1:91555378-91557534:CDC7	0.15	0.072	2.06438350033511	0.971207609694794	-0.636517127858899	8.28958961148347e-185	2.36543439563681e-180	CDC7	54271	distal
chr12:10394388-10396216:KLRC4-KLRK1	0.122	0.051	2.06048257039726	0.901844552267882	-0.686359819963406	6.60132937817445e-184	1.88368933806208e-179	KLRC4-KLRK1	0	distal
chr12:10394388-10396216:KLRK1	0.122	0.051	2.06048257039726	0.901844552267882	-0.686359819963406	6.60132937817445e-184	1.88368933806208e-179	KLRK1	-4371	distal
chr10:130300435-130302225:GLRX3	0.113	0.046	2.09684319485083	0.872471290115597	-0.725854737068144	8.50403167650211e-184	2.42662543888988e-179	GLRX3	164037	distal
chr5:148847459-148850045:ADRB2	0.092	0.032	2.13622055832211	0.795049570647301	-0.805003337304887	1.03387654962011e-183	2.95016673434099e-179	ADRB2	22215	distal
chr12:96240804-96243429:ELK3	0.153	0.075	2.02053808800359	0.968112494994481	-0.617992892819745	1.14824657328987e-183	3.27652159688265e-179	ELK3	46260	distal
chr14:100545909-100548716:BEGAIN	0.086	0.167	1.13666139574507	2.24259877009568	0.601792222727678	1.97666659401998e-183	5.640418126036e-179	BEGAIN	19354	distal
chr12:96445441-96446681:CFAP54	0.124	0.054	2.04101438791423	0.866221962861943	-0.704432055959804	5.52404139106287e-183	1.57628521093979e-178	CFAP54	-42906	distal
chr11:134348781-134350408:GLB1L2	0.074	0.022	2.32761100668497	0.707697353289055	-0.962434478254508	8.51881372183687e-182	2.43084349552615e-177	GLB1L2	16908	distal
chr1:185566721-185569100:HMCN1	0.125	0.055	2.13719510810059	0.923407384008199	-0.705810893310621	8.61160674385284e-182	2.45732198435841e-177	HMCN1	-165451	distal
chr7:3103438-3104471:CARD11	0.049	0.009	2.61939539092897	0.503101382288047	-1.2678063990922	1.17287410230741e-181	3.3467962509342e-177	CARD11	-59494	distal
chrX:15749672-15752022:CA5B	0.12	0.051	2.17711286167933	0.960566555947694	-0.696445722024679	2.92903147030185e-181	8.35799130050633e-177	CA5B	0	promoter
chr6:158849522-158851122:EZR	0.136	0.062	1.97953253141892	0.91187946879581	-0.640094425390204	1.6731393827562e-180	4.77430322869481e-176	EZR	-30111	distal
chr10:70610222-70611530:PRF1	0.093	0.034	2.17146208055095	0.833623383458683	-0.790450745320976	3.43525767226278e-178	9.80250776780184e-174	PRF1	-7448	distal
chr3:43477378-43478783:ANO10	0.09	0.033	2.26587789263197	0.795632090596327	-0.86297906653515	3.50894730828399e-178	1.00127811441884e-173	ANO10	143182	distal
chr5:157025043-157025858:HAVCR1	0.059	0.015	2.41771030053469	0.592475791701125	-1.10175867204397	1.42586079578232e-176	4.06869378076485e-172	HAVCR1	32618	distal
chr13:31805961-31807760:FRY	0.072	0.022	2.17221116353891	0.664608397927544	-0.930305988995745	1.78625269543381e-175	5.09707206642037e-171	FRY	-38953	distal
chr5:35810434-35811931:IL7R	0.084	0.03	2.19792562769525	0.738833429758973	-0.879016649908304	1.42740074273922e-173	4.07308801940638e-169	IL7R	-44918	distal
chr5:35810434-35811931:SPEF2	0.084	0.03	2.19792562769525	0.738833429758973	-0.879016649908304	1.42740074273922e-173	4.07308801940638e-169	SPEF2	0	distal
chr11:14577543-14579268:PSMA1	0.155	0.078	1.99928596715333	0.96888595363938	-0.607239536090598	1.51470653345289e-173	4.32221509320782e-169	PSMA1	-56848	distal
chr7:70659262-70661171:AUTS2	0.099	0.039	2.27215884327784	0.872393746732296	-0.805358932015333	4.59437900561468e-173	1.31100604925215e-168	AUTS2	-32887	distal
chr2:196175648-196178608:STK17B	0.169	0.092	1.95100632188889	0.957280494004016	-0.592356490874339	2.09460131692507e-172	5.97694485784568e-168	STK17B	0	promoter
chr16:9081167-9083047:C16orf72	0.058	0.015	2.37411705897464	0.573991573928199	-1.10008220855966	2.45438105566539e-172	7.00357634234119e-168	C16orf72	-8601	distal
chr2:7725078-7726296	0.088	0.032	2.20018667554899	0.803256901346083	-0.827551118630482	9.05041469206765e-172	2.5825358323815e-167	---	---	intergenic
chr1:185420438-185421376:IVNS1ABP	0.054	0.012	2.24064124089122	0.556926508590736	-1.0575784675274	1.65932253786717e-171	4.73487686180397e-167	IVNS1ABP	-103110	distal
chr1:108590368-108592542:FAM102B	0.112	0.047	1.94206611069565	0.866400719462197	-0.656570896959307	3.43253122178215e-171	9.79472784135537e-167	FAM102B	30280	distal
chr1:100712497-100714012:VCAM1	0.087	0.031	2.24465086109556	0.812609192854272	-0.839995339444331	4.52321987713008e-170	1.29070079193907e-165	VCAM1	-5730	distal
chr20:36564011-36565365:TGIF2	0.09	0.034	2.18294042679702	0.801664351703497	-0.821029891644071	6.20975159798228e-170	1.77195261848424e-165	TGIF2	-8123	distal
chr12:14394324-14396583:ATF7IP	0.136	0.064	2.01416549697369	0.966958761953329	-0.615791921022839	6.44348145373792e-170	1.83864743282412e-165	ATF7IP	9261	distal
chr14:52175484-52176940:PTGDR	0.072	0.023	2.40252182256663	0.738147846799403	-0.969053611727562	3.62469062975248e-169	1.03430547119987e-164	PTGDR	-90773	distal
chr3:51024498-51026102:DOCK3	0.155	0.081	2.14297647763577	1.03100981151868	-0.629934265791855	9.11627692677872e-169	2.60132962105631e-164	DOCK3	0	distal
chr11:128301839-128303340	0.152	0.078	2.02051943868725	0.968987330814747	-0.61734284269115	2.67148721354435e-167	7.62308876384881e-163	---	---	intergenic
chr2:241035096-241037534:SNED1	0.054	0.119	0.844430599472699	1.89113247942183	0.648459212814125	3.80210556585685e-167	1.08493082321725e-162	SNED1	-25844	distal
chr2:191113914-191116220:STAT4	0.106	0.044	2.0530391772893	0.884172222439544	-0.696315262381443	3.80310591318435e-167	1.08521627232715e-162	STAT4	34751	distal
chr1:67332675-67333665:IL12RB2	0.064	0.018	2.18756199221232	0.679041145058894	-0.924815815923	4.00874098571356e-167	1.14389424027336e-162	IL12RB2	24803	distal
chr22:21766419-21768099:MAPK1	0.123	0.056	2.08009937888274	0.919740345354193	-0.68206570768184	2.77919823209001e-166	7.93044215526885e-162	MAPK1	0	distal
chr22:21766419-21768099:YPEL1	0.123	0.056	2.08009937888274	0.919740345354193	-0.68206570768184	2.77919823209001e-166	7.93044215526885e-162	YPEL1	-30586	distal
chr10:8415917-8417279	0.079	0.027	2.0887425245163	0.712749860237902	-0.850705146505946	3.25303835321407e-165	9.28254494089636e-161	---	---	intergenic
chr5:68274983-68276050:PIK3R1	0.07	0.021	2.19829179343319	0.710951185689368	-0.902502968290031	6.18432906909923e-165	1.76469829986746e-160	PIK3R1	-12318	distal
chr6:105645921-105647070	0.093	0.035	2.12230332547903	0.870805353897988	-0.738951236440384	1.19931618349534e-164	3.42224872960394e-160	---	---	intergenic
chr6:46174755-46176287:ENPP5	0.065	0.019	2.27023765817517	0.682751143072577	-0.958573647916496	2.05805375139945e-164	5.87265637961834e-160	ENPP5	-3785	distal
chr14:94945360-94947081:DICER1	0.083	0.029	2.17879375825841	0.760550436846162	-0.852452858120651	2.44731916673473e-164	6.98342524227755e-160	DICER1	159000	distal
chr5:180367083-180368173:GFPT2	0.042	0.008	2.48734070808907	0.379440027595371	-1.33804458461578	1.50041900947195e-163	4.28144564352821e-159	GFPT2	-13697	distal
chr3:66301963-66304741:SLC25A26	0.146	0.074	2.00355908952926	0.972669027732553	-0.606524123971146	7.78608962778579e-163	2.22176067528867e-158	SLC25A26	58761	distal
chr7:77351286-77352352:GSAP	0.077	0.026	2.21766220057046	0.747296023950412	-0.880888827811237	9.05152618317956e-163	2.58285299637029e-158	GSAP	-25041	distal
chr8:123519572-123521034:FBXO32	0.079	0.028	2.322527584289	0.764270820448086	-0.913209141522834	2.21500629711819e-162	6.32052046882675e-158	FBXO32	20172	distal
chr10:6491439-6492757:PRKCQ	0.087	0.032	2.17416863948195	0.843879016083893	-0.783634780571088	3.08559216195936e-162	8.80473723415103e-158	PRKCQ	19415	distal
chr14:24692680-24693859:GZMB	0.086	0.031	2.17284198381147	0.865648526338956	-0.76609845362314	5.7470272732119e-161	1.63991423241102e-156	GZMB	-58414	distal
chr12:48932815-48934654:AC073610.5	0.081	0.029	2.23135111182549	0.780233982775443	-0.860070646903316	3.08589890625215e-160	8.8056125289905e-156	AC073610.5	5009	distal
chr12:48932815-48934654:RP11-302B13.5	0.081	0.029	2.23135111182549	0.780233982775443	-0.860070646903316	3.08589890625215e-160	8.8056125289905e-156	RP11-302B13.5	0	distal
chr4:38654071-38656440:KLF3	0.153	0.082	2.1757769441363	1.04093422648704	-0.637879896847875	7.17523005819338e-160	2.04745189710548e-155	KLF3	-7756	distal
chr10:119090290-119091707:EIF3A	0.102	0.042	2.10926855798944	0.868056200903852	-0.735037372971556	3.43089337938327e-159	9.79005425807017e-155	EIF3A	-9468	distal
chr12:10303903-10304714:KLRD1	0.053	0.013	2.43841807399686	0.6292842592575	-1.07750664031951	2.00204045489863e-158	5.71282243805323e-154	KLRD1	0	promoter
chr12:68158412-68160265:IFNG	0.079	0.028	2.07224153204567	0.767585175481384	-0.797511905087565	3.42595899671235e-158	9.77597399711869e-154	IFNG	0	promoter
chr8:30133488-30134511:LEPROTL1	0.125	0.06	2.08003814318558	0.954842848374454	-0.655895584758155	7.59996380346834e-158	2.16864967131969e-153	LEPROTL1	0	distal
chr8:30133488-30134511:MBOAT4	0.125	0.06	2.08003814318558	0.954842848374454	-0.655895584758155	7.59996380346834e-158	2.16864967131969e-153	MBOAT4	10175	distal
chr1:1593967-1598062:C1orf233	0.036	0.09	0.842229267379476	2.10194086212143	0.751718564420283	2.34030180614936e-157	6.67805120384721e-153	C1orf233	2034	distal
chr12:89949700-89951627	0.104	0.045	2.07196582062974	0.838373869250478	-0.740731967710687	9.68655885610866e-157	2.76405956959061e-152	---	---	intergenic
chr14:31127575-31129218:HECTD1	0.08	0.029	2.12400114042388	0.766480700066622	-0.822516993192107	1.91085194910568e-156	5.45261603677306e-152	HECTD1	78099	distal
chr19:51371618-51373924:NKG7	0.135	0.066	2.05547541861436	0.984799872863885	-0.622403326618153	3.58408057768808e-156	1.02271739284329e-151	NKG7	0	promoter
chr1:160755672-160757271:SLAMF7	0.085	0.032	2.14053145586811	0.800975464218629	-0.802230192915811	4.49073402026047e-156	1.28143095268133e-151	SLAMF7	16382	distal
chr3:149009478-149010374:GYG1	0.074	0.025	2.27806288293636	0.767766041796223	-0.890916178587763	7.10923533910963e-156	2.02862030401493e-151	GYG1	17921	distal
chr2:181145944-181146820:UBE2E3	0.058	0.016	2.41035776266967	0.701827923934624	-1.00283792282124	1.22722459110096e-155	3.50188537070659e-151	UBE2E3	163922	distal
chr19:7690544-7693353:FCER2	0.11	0.049	2.03193564452532	0.858335864046762	-0.706227862375454	1.70869897887795e-155	4.87577253622822e-151	FCER2	6126	distal
chr8:25198320-25199653:DOCK5	0.098	0.039	1.99590284742165	0.870571928424277	-0.679511397761822	3.66062274791848e-155	1.04455870111854e-150	DOCK5	13456	distal
chr1:67194161-67195262:C1orf141	0.064	0.019	2.22312698613954	0.720080158477023	-0.905985231052847	4.77967420329795e-155	1.36388003391107e-150	C1orf141	0	distal
chr1:67194161-67195262:IL23R	0.064	0.019	2.22312698613954	0.720080158477023	-0.905985231052847	4.77967420329795e-155	1.36388003391107e-150	IL23R	-12354	distal
chr15:94272137-94273277:MCTP2	0.061	0.018	2.28890356311308	0.714857545401867	-0.939517970704043	1.49116981046759e-154	4.25505305416928e-150	MCTP2	-24989	distal
chr8:20251514-20252590:LZTS1	0.073	0.026	2.35734510636399	0.770789504135445	-0.922928113971377	1.71786568306913e-154	4.90192972663777e-150	LZTS1	2591	distal
chr2:234032216-234033105:SPP2	0.049	0.011	2.29039657511056	0.555411122544322	-1.08096551482714	2.23750603745785e-154	6.38472347788598e-150	SPP2	-17574	distal
chr18:44729399-44730319:SETBP1	0.061	0.018	2.38628852999109	0.709879324806006	-0.985810393733004	2.94752030287853e-154	8.41074918426388e-150	SETBP1	28062	distal
chr21:26843338-26846935:ADAMTS1	0.081	0.03	2.13416863308641	0.749924724916603	-0.840789941553603	3.55338569798066e-154	1.01395860891878e-149	ADAMTS1	0	promoter
chr22:39205270-39206285:PDGFB	0.055	0.015	2.32526027196546	0.575147443894144	-1.0779803860079	1.09290583325201e-153	3.1186067951846e-149	PDGFB	34624	distal
chr1:225460246-225461377:LBR	0.072	0.025	2.33504076169799	0.772838615992907	-0.911643182851954	1.30344166956781e-153	3.71937080411176e-149	LBR	-31392	distal
chr8:125941608-125942983	0.145	0.075	2.00112407176399	0.982015898419838	-0.598534428811792	2.06686162480382e-153	5.89778964637769e-149	---	---	intergenic
chr9:96008444-96010599:ERCC6L2	0.083	0.031	2.22296745712677	0.841632545194505	-0.807404387315249	2.23671739828766e-153	6.38247309601384e-149	ERCC6L2	132744	distal
chr11:72519221-72520575:CLPB	0.06	0.018	2.41997731710078	0.747880154158628	-0.968380488679	4.61121774496329e-153	1.31581098352528e-148	CLPB	-84542	distal
chr1:25064411-25066732:RUNX3	0.134	0.067	2.01618065788581	0.974690607693638	-0.611096212048269	7.91611382981621e-153	2.25886308133805e-148	RUNX3	-99402	distal
chr11:35046624-35048689:CD44	0.105	0.047	2.09181928077639	0.87108548497043	-0.724580522065195	1.90004200329283e-152	5.42176985639609e-148	CD44	-90181	distal
chr5:131280934-131282026:CDC42SE2	0.084	0.031	2.24397590068961	0.875785281557758	-0.790268407817627	2.11984712382352e-152	6.04898376783041e-148	CDC42SE2	16835	distal
chr18:69934860-69936578:CD226	0.121	0.057	2.06932839210228	0.96179129674963	-0.645751440175954	2.67261204822312e-152	7.62629847960467e-148	CD226	10841	distal
chr17:30363384-30364455:CPD	0.112	0.051	1.9785630217471	0.89735157617193	-0.650629452007837	9.25080088128928e-152	2.6397160314759e-147	CPD	-14450	distal
chr12:52558632-52560361:KRT71	0.064	0.019	2.36732065345245	0.743399792948095	-0.949697665149895	3.47459749334915e-151	9.91476394727179e-147	KRT71	-5486	distal
chr15:89935988-89937314:ARPIN	0.052	0.013	2.56612044649618	0.637253832443749	-1.12307742304651	6.98658009346646e-151	1.99362062967066e-146	ARPIN	-23033	distal
chr1:28255970-28256966:SESN2	0.051	0.013	2.45621323531704	0.588974441052518	-1.12109631023152	1.12253637164306e-150	3.20315753648348e-146	SESN2	-2561	distal
chr2:144459286-144460540:ZEB2	0.097	0.04	1.99022096554226	0.85389654917495	-0.689691356656934	2.14358519580695e-150	6.11672035623513e-146	ZEB2	-4087	distal
chr15:90407734-90408762:IQGAP1	0.07	0.023	2.17057720261051	0.76973766782747	-0.8412099842215	2.77485287603221e-150	7.9180426817579e-146	IQGAP1	19474	distal
chr7:121530128-121531330:FAM3C	0.084	0.031	2.08320534286411	0.844172191102006	-0.741457609709397	8.38061950668394e-150	2.39140977623226e-145	FAM3C	-133795	distal
chr1:235296739-235298247:ARID4B	0.064	0.02	2.20974388800348	0.731043750451538	-0.890815998483886	1.07979598567741e-149	3.08119784513048e-145	ARID4B	0	distal
chr1:235296739-235298247:GGPS1	0.064	0.02	2.20974388800348	0.731043750451538	-0.890815998483886	1.07979598567741e-149	3.08119784513048e-145	GGPS1	-29103	distal
chr17:35213630-35215352:SLC35G3	0.123	0.059	2.06178148872886	0.983532212340613	-0.626299498291728	5.22981800295727e-149	1.49232856714386e-144	SLC35G3	-19108	distal
chr6:32685391-32686198:HLA-DQB1	0.097	0.04	2.01248987445396	0.851804285078755	-0.702024762193315	8.6129755600006e-149	2.45771257604617e-144	HLA-DQB1	-17009	distal
chr4:36284637-36286906:DTHD1	0.113	0.051	1.96004050748952	0.93240907553618	-0.615216385448327	1.04259436913955e-148	2.9750430323397e-144	DTHD1	616	distal
chr1:108956328-108957446:CLCC1	0.08	0.031	2.24793277541997	0.820766723473705	-0.834975676283158	1.07851635643943e-148	3.0775464230999e-144	CLCC1	-5881	distal
chr1:108956328-108957446:RP11-475E11.9	0.08	0.031	2.24793277541997	0.820766723473705	-0.834975676283158	1.07851635643943e-148	3.0775464230999e-144	RP11-475E11.9	0	distal
chr7:36784574-36785624:AOAH	0.106	0.048	2.16130142152952	0.921115816759205	-0.718574102648777	1.17830712429686e-148	3.36229937918109e-144	AOAH	-60026	distal
chr2:157413105-157414586:CYTIP	0.09	0.037	2.13919783957256	0.874699054494932	-0.743736935482947	1.73837107338009e-148	4.9604418578901e-144	CYTIP	29556	distal
chr22:28810355-28812691:XBP1	0.121	0.057	2.00387405948753	0.9575558578908	-0.61777085295025	1.79939186123671e-148	5.13456467603895e-144	XBP1	-9759	distal
chr5:72234096-72234935:MRPS27	0.064	0.019	2.15127547960442	0.719026682802365	-0.874343939465294	1.82694118655742e-148	5.21317667584158e-144	MRPS27	85293	distal
chr2:191126270-191128971:STAT4	0.08	0.029	2.24754117644912	0.853998586471592	-0.808707674085929	2.65836063988446e-148	7.58563208591031e-144	STAT4	22000	distal
chr11:114065140-114067038:ZBTB16	0.062	0.019	2.32340554218964	0.690207222169361	-0.975462216087162	3.43938105534748e-148	9.81427384143402e-144	ZBTB16	4634	distal
chr2:28620003-28622420:PLB1	0.134	0.068	2.02546477443859	0.997301850610525	-0.599104404843828	4.12881460198898e-148	1.17815724667755e-143	PLB1	123933	distal
chr17:35160348-35162087:UNC45B	0.093	0.039	2.30751469160173	0.906965167952235	-0.794469072743455	9.90736126321549e-148	2.82706553645854e-143	UNC45B	12085	distal
chr1:184840356-184841179:EDEM3	0.063	0.019	2.09274583566716	0.695671948587694	-0.867031189064483	1.21059700706774e-147	3.45443855966779e-143	EDEM3	-85444	distal
chr1:184840356-184841179:FAM129A	0.063	0.019	2.09274583566716	0.695671948587694	-0.867031189064483	1.21059700706774e-147	3.45443855966779e-143	FAM129A	0	distal
chr2:30421351-30423103:LCLAT1	0.112	0.052	2.17844297559384	0.956323211950269	-0.700175461913299	3.5230574427494e-147	1.00530444128854e-142	LCLAT1	-24133	distal
chr19:13885877-13888074:C19orf57	0.125	0.061	2.10392380746366	0.998455564504281	-0.635207648974497	8.75146010039785e-147	2.49722913964853e-142	C19orf57	0	distal
chr19:13885877-13888074:NANOS3	0.125	0.061	2.10392380746366	0.998455564504281	-0.635207648974497	8.75146010039785e-147	2.49722913964853e-142	NANOS3	8629	distal
chr8:124649569-124651550:MTSS1	0.074	0.027	2.23007656990423	0.779780095675918	-0.859869367726242	1.92788610021306e-146	5.50122298695796e-142	MTSS1	76468	distal
chr2:195648660-195651445:SLC39A10	0.099	0.042	1.93016502946559	0.845962423408306	-0.666608735145188	2.03793234507458e-146	5.8152399466703e-142	SLC39A10	-5302	distal
chr2:102366601-102369114:IL18R1	0.097	0.041	2.02665841555514	0.85713988820139	-0.704643374102002	4.30934283936254e-146	1.2296709792121e-141	IL18R1	3965	distal
chr6:16481177-16482356:ATXN1	0.105	0.047	2.09694409052365	0.928104844115778	-0.683661835314655	5.34779027462078e-146	1.52599195486304e-141	ATXN1	-152897	distal
chr19:19420278-19421612:GATAD2A	0.084	0.032	2.09988549473099	0.824414407815141	-0.764781456779926	8.78886916185936e-146	2.50790381533657e-141	GATAD2A	-5915	distal
chr7:36787716-36789429:AOAH	0.079	0.029	2.17164451923508	0.858639398258597	-0.770984186926279	6.3999872017048e-145	1.82623634800646e-140	AOAH	-63168	distal
chr17:68356120-68357364:ARSG	0.111	0.051	2.09162795092022	0.975816034025184	-0.645918089099051	8.87782723258221e-145	2.53328800081733e-140	ARSG	64603	distal
chr14:38078092-38079073:SSTR1	0.059	0.017	2.40354660009887	0.758270752282192	-0.952881617658721	1.04494351653577e-144	2.98174632443483e-140	SSTR1	-128926	distal
chr11:114072228-114076355:ZBTB16	0.124	0.061	2.01291951757689	0.969277240251864	-0.613495903443434	1.81830701025575e-144	5.18853905376477e-140	ZBTB16	11722	distal
chr14:105576072-105578525:IGHA2	0.01	0.043	0.554086345032047	2.30577946229101	1.08892381955229	3.49658068286953e-144	9.9774929785682e-140	IGHA2	9870	distal
chr18:12920806-12921900:SEH1L	0.068	0.023	2.28746818530115	0.776617583938945	-0.887843757306678	4.10356120358466e-144	1.17095118944288e-139	SEH1L	-26095	distal
chr1:184889963-184891154:FAM129A	0.089	0.036	1.99536977750751	0.81633127849893	-0.72170675622323	1.00103390372337e-143	2.85645024427465e-139	FAM129A	83396	distal
chr12:9009935-9010662:KLRG1	0.042	0.009	2.46271760105695	0.563999115123263	-1.14666503818471	1.4958924611007e-143	4.26852913775085e-139	KLRG1	20315	distal
chr5:88203869-88204859:TMEM161B	0.059	0.018	2.26663154920656	0.707279541090979	-0.936104441996634	1.87579703110262e-143	5.35258682825132e-139	TMEM161B	15772	distal
chr19:14459520-14460256:PKN1	0.063	0.02	2.2890966234507	0.748638865343518	-0.911459020806858	2.55424602845686e-143	7.28854104220164e-139	PKN1	0	distal
chr19:14459520-14460256:PTGER1	0.063	0.02	2.2890966234507	0.748638865343518	-0.911459020806858	2.55424602845686e-143	7.28854104220164e-139	PTGER1	15106	distal
chrX:1469607-1472600:ASMTL	0.143	0.078	2.0868180048577	1.00815377403968	-0.620250678215119	3.11793271182776e-142	8.89702099320051e-138	ASMTL	-15846	distal
chrX:1469607-1472600:P2RY8	0.143	0.078	2.0868180048577	1.00815377403968	-0.620250678215119	3.11793271182776e-142	8.89702099320051e-138	P2RY8	0	distal
chr10:124688323-124689875:FAM53B	0.094	0.039	2.03475335888412	0.877453612477363	-0.692802007696457	4.37460750767836e-142	1.24829425231602e-137	FAM53B	53095	distal
chr10:124688323-124689875:RP11-12J10.3	0.094	0.039	2.03475335888412	0.877453612477363	-0.692802007696457	4.37460750767836e-142	1.24829425231602e-137	RP11-12J10.3	0	distal
chr19:47539728-47542498:ZNF541	0.094	0.04	2.03537791703796	0.85540621496823	-0.710141070014463	6.33242088824323e-142	1.80695630046021e-137	ZNF541	13358	distal
chr8:29490008-29491680:DUSP4	0.104	0.048	2.10256916365009	0.92849763565028	-0.685985994604922	2.23867667648854e-141	6.38806389636006e-137	DUSP4	-139341	distal
chr1:168362779-168363742:TBX19	0.094	0.041	2.16403637142241	0.921074228197571	-0.719852919829622	4.63219051012659e-141	1.32179556206462e-136	TBX19	81740	distal
chr1:199172832-199174463	0.066	0.022	2.14373888341813	0.766097238076132	-0.831916616092925	9.0764312593547e-141	2.58995965985686e-136	---	---	intergenic
chr12:96433855-96434874:CDK17	0.095	0.041	2.0941775521509	0.904694253619817	-0.699996553631229	1.09633105842773e-140	3.12838067522354e-136	CDK17	-33296	distal
chr22:46280122-46281785:TTC38	0.093	0.04	2.13204471289138	0.880309764051688	-0.736134456147462	1.82339326092055e-140	5.2030526700368e-136	TTC38	12083	distal
chr2:39216421-39217571:CDKL4	0.07	0.026	2.26424837629672	0.759484892737095	-0.891597709097405	9.452319966793e-140	2.69721950252438e-135	CDKL4	11961	distal
chr5:175796612-175797554:CPLX2	0.038	0.089	0.952015770567183	2.18296677169066	0.705407387508559	2.26924694664634e-139	6.47529616225533e-135	CPLX2	303	distal
chr2:181393333-181396258:ITGA4	0.086	0.034	2.05583958966034	0.836910984129968	-0.734287098100422	2.47438087013757e-139	7.06064581293756e-135	ITGA4	-60949	distal
chr15:60844041-60845544:RORA	0.102	0.047	2.13507851272619	0.923861719867564	-0.704496466130981	3.66133957429272e-139	1.04476324752443e-134	RORA	0	distal
chr5:155767169-155768786:SGCD	0.039	0.008	2.47147452744862	0.493261329993932	-1.21708191730267	1.02004467553797e-138	2.9106974816476e-134	SGCD	-101558	distal
chr19:13043956-13045043:NFIX	0.079	0.031	2.17984099953594	0.84853981782669	-0.782568509014827	2.33651523306221e-138	6.66724621754303e-134	NFIX	19018	distal
chr10:333328-334378:DIP2C	0.069	0.024	2.1833764236556	0.792514771016242	-0.828572753600178	4.4693987244979e-138	1.27534292603548e-133	DIP2C	0	distal
chr10:333328-334378:ZMYND11	0.069	0.024	2.1833764236556	0.792514771016242	-0.828572753600178	4.4693987244979e-138	1.27534292603548e-133	ZMYND11	135388	distal
chr16:89256523-89257807:ZNF778	0.06	0.118	0.983690656457569	2.0337618341392	0.612920766632543	8.40318316254723e-138	2.39784831543285e-133	ZNF778	35448	distal
chr3:142269703-142271104:GK5	0.097	0.041	2.1176965378808	1.00836659856448	-0.63445787297831	1.45150944181547e-137	4.14188219222043e-133	GK5	-44097	distal
chr17:64050940-64051825:ERN1	0.061	0.02	2.40211363101397	0.776826921960983	-0.937128170542202	2.47904574240694e-137	7.0739570259582e-133	ERN1	0	distal
chr17:64050940-64051825:ICAM2	0.061	0.02	2.40211363101397	0.776826921960983	-0.937128170542202	2.47904574240694e-137	7.0739570259582e-133	ICAM2	-30307	distal
chr14:92530926-92532839:RIN3	0.124	0.062	2.04830702274056	1.00466629450904	-0.604646117735056	3.38111058160502e-137	9.64799904460991e-133	RIN3	17123	distal
chr4:1176343-1178036:SPON2	0.086	0.035	2.13751700830775	0.905344491388722	-0.719571415424777	3.53725401534474e-137	1.00935543327862e-132	SPON2	-3133	distal
chr4:89294182-89295657:GPRIN3	0.08	0.031	2.10499802286209	0.851925444177851	-0.74556633083052	5.74266814143013e-137	1.63867035415709e-132	GPRIN3	12353	distal
chr12:128387754-128389526:TMEM132C	0.061	0.02	2.33840839588545	0.748488158288138	-0.933052428651066	6.66438268433286e-137	1.90168159897438e-132	TMEM132C	120352	distal
chrX:3743222-3744500:PRKX	0.053	0.016	2.45258650422295	0.660384740391202	-1.05615998335885	1.01927914634364e-136	2.90851304409157e-132	PRKX	-29615	distal
chr18:3511764-3512533:DLGAP1	0.05	0.013	2.36015558653757	0.734252973547643	-0.954213677970345	1.09131662717395e-136	3.11407199564086e-132	DLGAP1	0	distal
chr18:3511764-3512533:TGIF1	0.05	0.013	2.36015558653757	0.734252973547643	-0.954213677970345	1.09131662717395e-136	3.11407199564086e-132	TGIF1	56351	distal
chr1:33045509-33046413:AK2	0.049	0.013	2.31869662923975	0.609612228254422	-1.04390358442818	1.28708232408997e-136	3.67268941179073e-132	AK2	-8518	distal
chr3:161310517-161311683:SPTSSB	0.057	0.018	2.29848801295336	0.692615477436923	-0.962550598062279	3.78750520944855e-136	1.08076461151614e-131	SPTSSB	34640	distal
chr2:42123496-42124779:EML4	0.055	0.017	2.27069421816239	0.656393409273464	-0.9815515187184	6.33047327209677e-136	1.80640054819281e-131	EML4	-44571	distal
chr12:9615061-9616280:KLRB1	0.066	0.022	2.23278778716758	0.795554014659465	-0.848349752974715	6.49434383260637e-136	1.85316101263423e-131	KLRB1	-7176	distal
chr19:38680858-38681833:ACTN4	0.099	0.044	2.07947244575579	0.920201879002766	-0.681425223805133	9.26333589510142e-136	2.64329289766719e-131	ACTN4	33113	distal
chr3:41419035-41420075:CTNNB1	0.043	0.01	2.48823384406682	0.607807979259669	-1.11740164315653	6.06744231795742e-135	1.73134466542915e-130	CTNNB1	198082	distal
chr3:41419035-41420075:ULK4	0.043	0.01	2.48823384406682	0.607807979259669	-1.11740164315653	6.06744231795742e-135	1.73134466542915e-130	ULK4	0	distal
chr13:29901723-29902789:UBL3	0.046	0.011	2.43977911865945	0.613364903078487	-1.09224314975547	7.70047097347795e-135	2.19732939228193e-130	UBL3	-51040	distal
chr13:24617869-24619199:ATP12A	0.118	0.059	1.98954310217047	0.955186323996014	-0.612618912273014	1.13287883779727e-134	3.23266976365451e-130	ATP12A	-61212	distal
chr6:80453504-80454866	0.044	0.01	2.48047110226457	0.6474914804592	-1.07901159180354	1.15520558359823e-134	3.29637913279756e-130	---	---	intergenic
chr7:132450172-132451828:PLXNA4	0.052	0.015	2.33531581799639	0.67528489755204	-0.993416915399096	1.7343082552213e-134	4.94884860627397e-130	PLXNA4	124642	distal
chr3:18740198-18741966	0.102	0.046	1.99076968744936	0.921273593790346	-0.638453839251102	2.50323966394212e-134	7.14299438105885e-130	---	---	intergenic
chr11:128525111-128526291:ETS1	0.097	0.044	2.12114546237708	0.947265933339762	-0.680625673428452	2.71773956951954e-133	7.75506986162402e-129	ETS1	-2802	distal
chr15:60839875-60842000:RORA	0.104	0.049	2.12103616015923	0.958212330900794	-0.67248786606788	2.90177780641089e-133	8.28022297059348e-129	RORA	0	distal
chr10:67612678-67613707:CTNNA3	0.048	0.013	2.39947512062672	0.648686366225627	-1.04399503391485	2.93435534958891e-133	8.37318299005195e-129	CTNNA3	82462	distal
chr16:31364473-31365681:ITGAX	0.065	0.022	2.20092577869266	0.80988230408672	-0.822593342367237	1.17788718172146e-132	3.36110107304217e-128	ITGAX	9252	distal
chr11:115256236-115257286:CADM1	0.053	0.015	2.21155943497245	0.705794314654249	-0.912830299627624	3.46895854716047e-132	9.8986732143224e-128	CADM1	-15815	distal
chr11:128304276-128306084	0.074	0.028	2.160847008773	0.833989497265572	-0.785325830594097	3.91692948843328e-132	1.11769582952444e-127	---	---	intergenic
chr2:84781882-84783541:DNAH6	0.077	0.03	2.17706152751184	0.857794679325877	-0.774101963754179	5.5301007528879e-132	1.57801424983656e-127	DNAH6	0	distal
chr2:84781882-84783541:TRABD2A	0.077	0.03	2.17706152751184	0.857794679325877	-0.774101963754179	5.5301007528879e-132	1.57801424983656e-127	TRABD2A	97609	distal
chr9:121353274-121354405:STOM	0.095	0.042	1.99298723207444	0.909269462031531	-0.648565394562913	3.15022227823011e-131	8.98915927092963e-127	STOM	15800	distal
chr18:45938221-45939269:EPG5	0.05	0.014	2.29631676603018	0.730143878815424	-0.929962870382346	1.22710703478466e-130	3.50154992375802e-126	EPG5	28005	distal
chr12:8953630-8954957:M6PR	0.068	0.025	2.2266489493129	0.805105509411546	-0.837953459143519	2.24438570750453e-130	6.40435461636417e-126	M6PR	-3676	distal
chr7:36780735-36781614:AOAH	0.064	0.023	2.39190556699877	0.821746879632994	-0.896773485244179	5.00260627865721e-130	1.42749370161484e-125	AOAH	-56187	distal
chr2:6909323-6910490:RNF144A	0.06	0.02	2.28442941853535	0.767918471439196	-0.893591017205458	1.56741781880209e-129	4.47262674595176e-125	RNF144A	-6902	distal
chr2:234422098-234424241:ARL4C	0.098	0.045	2.12958694376072	0.964523243545334	-0.671793019318964	2.71733047383932e-129	7.75390250710051e-125	ARL4C	72359	distal
chr1:111470228-111471768:C1orf162	0.111	0.054	1.9324350539215	0.935417805200401	-0.599454117074615	4.96993266894568e-129	1.41817028708365e-124	C1orf162	-2024	distal
chr9:94870878-94871802:C9orf3	0.071	0.027	2.27360307493084	0.839966490906443	-0.831199912881195	1.12362781242622e-128	3.20627196275821e-124	C9orf3	111230	distal
chr12:9024692-9025892:KLRG1	0.074	0.029	2.16539855443423	0.841549646688846	-0.781466868760468	1.66112120621503e-128	4.7400093619346e-124	KLRG1	35072	distal
chr2:181123485-181125683:UBE2E3	0.109	0.053	2.04181042462519	0.988093892334124	-0.613544349364705	2.9790429322721e-128	8.50069900723844e-124	UBE2E3	141463	distal
chr20:64285535-64287101:PCMTD2	0.042	0.093	0.909540169791602	1.96488338644991	0.634750093065911	3.06380669984813e-128	8.74257241801664e-124	PCMTD2	29768	distal
chr1:92980646-92981838:FAM69A	0.113	0.055	2.06836534691798	1.02081361613841	-0.6025340081188	4.64920169569511e-128	1.3266497038666e-123	FAM69A	-19125	distal
chr9:7935402-7936506:TMEM261	0.073	0.028	2.16404655945528	0.865240793827151	-0.76240894179905	7.47730416534124e-128	2.13364874358012e-123	TMEM261	-135336	distal
chr11:126332096-126332821:DCPS	0.054	0.017	2.39292503921691	0.759762873716526	-0.947148516312599	2.30682545659268e-127	6.5825264403872e-123	DCPS	0	distal
chr11:126332096-126332821:ST3GAL4	0.054	0.017	2.39292503921691	0.759762873716526	-0.947148516312599	2.30682545659268e-127	6.5825264403872e-123	ST3GAL4	-22839	distal
chr1:117660543-117661685:FAM46C	0.099	0.047	2.09207055882852	0.933308111643419	-0.677501662475486	3.15276033525374e-127	8.99640161664655e-123	FAM46C	54610	distal
chr2:159144752-159145864:TANC1	0.053	0.016	2.26153080001942	0.738717597319006	-0.907525623563881	6.46117942295398e-127	1.84369754833992e-122	TANC1	0	distal
chr2:159144752-159145864:WDSUB1	0.053	0.016	2.26153080001942	0.738717597319006	-0.907525623563881	6.46117942295398e-127	1.84369754833992e-122	WDSUB1	140688	distal
chr17:74282484-74283618:DNAI2	0.058	0.019	2.27331263773176	0.747858950280294	-0.905162636264342	7.26588126662666e-127	2.07331921943192e-122	DNAI2	973	distal
chr16:26597773-26598886	0.085	0.036	2.02754656564533	0.863285173491274	-0.700300655813356	1.04614831008225e-126	2.98518420281969e-122	---	---	intergenic
chr12:122898086-122899268:VPS37B	0.079	0.032	2.14250167027807	0.88907977319817	-0.734229885448475	2.83649780646639e-126	8.09394649075184e-122	VPS37B	-1643	distal
chr4:169015718-169016801:CBR4	0.059	0.02	2.35938305453299	0.785292533984047	-0.912035818271613	3.12810482675399e-126	8.92604712314252e-122	CBR4	-5461	distal
chr11:14764184-14765715:PDE3B	0.093	0.041	2.0350924040625	0.939283387376231	-0.646216800522696	7.92798661578671e-126	2.26225098081474e-121	PDE3B	120354	distal
chr14:98188792-98190429	0.072	0.03	2.40536764602949	0.876426917434036	-0.859822459453202	8.10661715058895e-126	2.31322320392056e-121	---	---	intergenic
chr6:137974996-137976671:TNFAIP3	0.075	0.03	2.16862152364948	0.908997863470438	-0.731039859046959	1.30972187557656e-125	3.7372913719577e-121	TNFAIP3	103786	distal
chr1:39525415-39526397:BMP8A	0.058	0.02	2.02425511929978	0.646160476260712	-0.877474863162648	2.12634273434563e-125	6.06751899245525e-121	BMP8A	33770	distal
chr12:68367671-68368784:MDM1	0.055	0.017	2.047158550926	0.681739781123807	-0.857510076996383	2.49773277479659e-125	7.12728047288208e-121	MDM1	-35291	distal
chr10:3892199-3893251:KLF6	0.061	0.021	2.20616778313657	0.761894112537153	-0.86372270283378	5.7458332782989e-125	1.63957352596259e-120	KLF6	-106919	distal
chr5:76732401-76733617:F2R	0.1	0.048	2.04065772783416	0.926370584366557	-0.658498160830869	6.65386092164342e-125	1.89867921399095e-120	F2R	16203	distal
chr14:65846411-65847973	0.093	0.044	2.26410883447612	0.95290941698861	-0.741064128224886	2.70124245269929e-124	7.70799533877742e-120	---	---	intergenic
chr2:41896214-41897176:C2orf91	0.044	0.012	2.3385351050912	0.656310771589653	-1.01124182105628	2.96483410859096e-124	8.4601541288643e-120	C2orf91	56119	distal
chr2:223760646-223762221:AP1S3	0.116	0.057	2.0216188029321	1.01334566492539	-0.585726781266807	3.59943334870737e-124	1.02709830605365e-119	AP1S3	75263	distal
chr6:151373088-151375301:ZBTB2	0.074	0.029	2.11353262522517	0.860113999968552	-0.743161354764737	4.64677817901211e-124	1.3259581533811e-119	ZBTB2	16247	distal
chr5:67514857-67516254	0.053	0.016	2.28513081423053	0.725867017261466	-0.928629514718863	8.20793582060915e-124	2.34213448641082e-119	---	---	intergenic
chr7:55308754-55310305:LANCL2	0.092	0.041	2.0623083191579	0.928023729808393	-0.667496735355725	1.36599552543444e-123	3.89786823182718e-119	LANCL2	-55143	distal
chr22:19419053-19420542:HIRA	0.076	0.031	2.13378023892745	0.876406680183904	-0.739931470103478	2.26623173089428e-123	6.46669224410683e-119	HIRA	11154	distal
chrX:72105097-72106122:NHSL2	0.087	0.038	2.08334160208484	0.894142482410411	-0.702949875633179	3.24038881762111e-123	9.24644949108184e-119	NHSL2	0	distal
chrX:72105097-72106122:RGAG4	0.087	0.038	2.08334160208484	0.894142482410411	-0.702949875633179	3.24038881762111e-123	9.24644949108184e-119	RGAG4	25706	distal
chr6:152634619-152635412:SYNE1	0.057	0.019	2.23985828958373	0.712073746134538	-0.920185865496404	9.84974470935052e-123	2.81062465281317e-118	SYNE1	1271	distal
chr16:50335039-50336015:BRD7	0.058	0.019	1.82346536579172	0.669611997297546	-0.757954062129428	1.59475791878066e-122	4.55064172124062e-118	BRD7	32764	distal
chr7:131235332-131236262:MKLN1	0.077	0.032	2.02408045209329	0.843852753264622	-0.713773071910382	2.32122399091428e-122	6.62361265807388e-118	MKLN1	-48800	distal
chr19:39502531-39503411:DLL3	0.045	0.095	0.976011867791576	2.05227031452075	0.627291123808857	2.38747892247583e-122	6.81267110528478e-118	DLL3	3564	distal
chr7:38316588-38319238:TRGV9	0.101	0.048	2.09799080861702	0.976823354900912	-0.648148903426066	3.09958771619603e-122	8.84467354816538e-118	TRGV9	0	promoter
chr17:35889006-35892582:CCL5	0.105	0.05	1.96680183798412	0.959213133438984	-0.598634217856298	4.61678969529195e-122	1.31740093955156e-117	CCL5	-8214	distal
chr4:121706383-121707374:ANXA5	0.061	0.022	2.1967229552145	0.79924215022675	-0.829204353868991	6.51799307376202e-122	1.85990932359799e-117	ANXA5	-9271	distal
chr13:46751568-46752527:ESD	0.095	0.043	2.01149434613683	0.94951171749444	-0.627366724321382	9.51922997924452e-122	2.71631227457742e-117	ESD	44606	distal
chr13:46751568-46752527:LRCH1	0.095	0.043	2.01149434613683	0.94951171749444	-0.627366724321382	9.51922997924452e-122	2.71631227457742e-117	LRCH1	0	distal
chr8:143553065-143554227:GSDMD	0.018	0.056	0.726841318993809	2.00150237903353	0.797549293056851	4.35778806290544e-121	1.24349482375007e-116	GSDMD	0	promoter
chr5:74630244-74632547:ENC1	0.099	0.046	1.94545648458886	0.953447695793742	-0.592468611751911	6.92334915658488e-121	1.97557768183149e-116	ENC1	0	distal
chr5:74630244-74632547:HEXB	0.099	0.046	1.94545648458886	0.953447695793742	-0.592468611751911	6.92334915658488e-121	1.97557768183149e-116	HEXB	-7476	distal
chr2:144323973-144325752:GTDC1	0.07	0.027	2.08612456992345	0.820502634540793	-0.76145946819011	1.08392869367013e-120	3.09299052738771e-116	GTDC1	6764	distal
chr20:36627710-36628696:SLA2	0.068	0.026	2.2080887406641	0.850245808316298	-0.793997101531613	7.15459497101272e-120	2.04156367497848e-115	SLA2	17185	distal
chr10:97412883-97415475:RRP12	0.077	0.032	2.2073645168156	0.891598332552214	-0.761782550145764	9.21697240511808e-120	2.63006307580044e-115	RRP12	10599	distal
chr17:3763163-3763887:ITGAE	0.061	0.022	2.20261306992927	0.789876460447452	-0.839389492292018	2.26398392418281e-119	6.46027812765565e-115	ITGAE	37356	distal
chr21:46621665-46623003:PRMT2	0.063	0.023	2.33133267773613	0.847493864587625	-0.850529860155456	3.4229994479336e-119	9.76752892467853e-115	PRMT2	-12164	distal
chr8:90466933-90468309:TMEM64	0.081	0.034	2.00325801992055	0.888367757075213	-0.669388671989621	3.55100185021596e-119	1.01327837795912e-114	TMEM64	177596	distal
chr14:55806747-55808072:KTN1	0.111	0.058	2.06999828268971	0.990588484113388	-0.625042846145374	1.19220801738405e-118	3.40196557760539e-114	KTN1	145474	distal
chr22:41603762-41604515:DESI1	0.063	0.024	2.23544107749171	0.820819879442161	-0.829374189722033	1.48127942366892e-118	4.22683083543925e-114	DESI1	0	distal
chr22:41603762-41604515:PMM1	0.063	0.024	2.23544107749171	0.820819879442161	-0.829374189722033	1.48127942366892e-118	4.22683083543925e-114	PMM1	-13873	distal
chr5:1518005-1519445:LPCAT1	0.082	0.035	2.1455673048682	0.932096531254054	-0.703153055658666	4.17756686034902e-118	1.19206870360059e-113	LPCAT1	4532	distal
chr20:10350665-10352051:MKKS	0.074	0.03	2.11186760330217	0.906273349809823	-0.707025671964886	4.4339057237447e-118	1.26521499827055e-113	MKKS	79871	distal
chr20:10350665-10352051:RP5-931K24.3	0.074	0.03	2.11186760330217	0.906273349809823	-0.707025671964886	4.4339057237447e-118	1.26521499827055e-113	RP5-931K24.3	79871	distal
chr2:191206211-191207450:MYO1B	0.085	0.038	2.11802828259628	0.951159242342462	-0.676302487116818	4.96405576112412e-118	1.41649331143677e-113	MYO1B	-37826	distal
chr7:3106270-3108248:CARD11	0.068	0.025	2.27373948711658	0.939097334700622	-0.755554299078258	1.10906642168443e-117	3.16472103427652e-113	CARD11	-62326	distal
chr9:88322709-88323466:SPIN1	0.055	0.019	2.34033506651469	0.772170994480482	-0.914475011237312	1.44930718481767e-117	4.13559805187722e-113	SPIN1	-64953	distal
chr19:40826521-40827532:CTC-490E21.12	0.126	0.069	2.07054725483478	1.03841905097909	-0.591045139775733	1.48135408715419e-117	4.22704388769449e-113	CTC-490E21.12	0	distal
chr19:40826521-40827532:CYP2A6	0.126	0.069	2.07054725483478	1.03841905097909	-0.591045139775733	1.48135408715419e-117	4.22704388769449e-113	CYP2A6	22915	distal
chrX:136586180-136586941:VGLL1	0.054	0.018	2.41590093574583	0.779897324154823	-0.940472116360078	3.15917554232783e-117	9.01470741003245e-113	VGLL1	54029	distal
chr16:53911382-53912801:FTO	0.061	0.022	2.15559572038875	0.776864940504663	-0.828578359811134	3.79506583628461e-117	1.08292203638381e-112	FTO	127	distal
chr17:77127592-77128526:SEC14L1	0.097	0.047	2.02189492430728	0.944666971959906	-0.635930384761092	6.35270285811648e-117	1.81274376056354e-112	SEC14L1	-12406	distal
chr20:23455646-23457331:CST11	0.055	0.018	2.32418811349186	0.805875882343364	-0.88030328557672	2.68273067651442e-116	7.65517198543389e-112	CST11	-2790	distal
chr5:107474441-107475718:EFNA5	0.054	0.018	2.16218909515787	0.778594111043581	-0.830186327748272	4.45928065422012e-116	1.27245573468171e-111	EFNA5	-46928	distal
chr3:3109433-3110820:IL5RA	0.038	0.009	2.08945487705631	0.490880560687728	-1.05118761911622	5.8849193667177e-116	1.6792617412929e-111	IL5RA	0	promoter
chr14:105579802-105583172:IGHA2	0.008	0.035	0.565838555244811	2.27066984012162	1.06265066081587	6.0752317867538e-116	1.7335673903502e-111	IGHA2	5223	distal
chr9:96015788-96017243:ERCC6L2	0.061	0.022	2.20700220088434	0.819048069227174	-0.818041676455886	1.85639077015739e-115	5.29721106264412e-111	ERCC6L2	140088	distal
chr6:112285900-112286600:LAMA4	0.044	0.012	2.16944006802588	0.641853847284106	-0.948902279249601	2.04235478003642e-115	5.82785936483393e-111	LAMA4	-31186	distal
chr6:112285900-112286600:RP11-506B6.7	0.044	0.012	2.16944006802588	0.641853847284106	-0.948902279249601	2.04235478003642e-115	5.82785936483393e-111	RP11-506B6.7	0	distal
chr2:144505240-144506101:ZEB2	0.059	0.021	2.08690298005305	0.786899442085463	-0.788701691540684	7.97684302483403e-115	2.27619215713639e-110	ZEB2	10063	distal
chr16:57601641-57602641:ADGRG1	0.071	0.029	2.09073474656978	0.840441614054355	-0.74789786178559	8.68774270320729e-115	2.4790473803602e-110	ADGRG1	-17301	distal
chr6:150310476-150311961:IYD	0.06	0.022	2.11634916690183	0.750494408612676	-0.832094433614181	9.09608566318229e-115	2.59556804398907e-110	IYD	-56931	distal
chr3:43345575-43348084:SNRK	0.083	0.038	2.15412595556312	0.917373452256006	-0.718108911093807	1.2123760673195e-114	3.45951510809619e-110	SNRK	58990	distal
chr22:23278657-23280062:BCR	0.067	0.026	2.23485011989279	0.852984771151913	-0.803847844915163	1.24552585806537e-114	3.55410803598952e-110	BCR	98293	distal
chr8:134278076-134278783	0.049	0.015	2.29446616562238	0.75115523335731	-0.911737731313997	2.23025565811387e-114	6.36403452042793e-110	---	---	intergenic
chr2:101516789-101518192:RFX8	0.012	0.041	0.523010449820437	2.12343520966607	1.03620776335477	2.60315885236991e-114	7.42811378523753e-110	RFX8	-42087	distal
chr12:116924410-116925226:FBXW8	0.043	0.012	2.37402534649928	0.658920300334894	-1.02422623511813	4.86426867704226e-114	1.38801906699401e-109	FBXW8	13446	distal
chr15:85646263-85647355:AKAP13	0.086	0.038	2.03925651166092	0.945915652507672	-0.643269266166906	4.9832630641531e-114	1.42197411535609e-109	AKAP13	11167	distal
chr5:150045712-150046565:CSF1R	0.053	0.018	2.25640844329687	0.794939032942681	-0.859346822468168	6.41487050869386e-114	1.83048329965579e-109	CSF1R	39862	distal
chr5:150045712-150046565:HMGXB3	0.053	0.018	2.25640844329687	0.794939032942681	-0.859346822468168	6.41487050869386e-114	1.83048329965579e-109	HMGXB3	0	distal
chr1:193478994-193479802	0.073	0.031	2.25149261238229	0.871774239315464	-0.796695708532433	6.69412844683783e-114	1.91016955230517e-109	---	---	intergenic
chr3:101643788-101644637:ZBTB11	0.042	0.011	2.30771922253973	0.666183429901759	-0.989289540247639	1.00794305648153e-113	2.87616551167005e-109	ZBTB11	32481	distal
chr20:57604863-57606211:ZBP1	0.053	0.017	2.1641829140985	0.777825386789972	-0.831719367572442	1.64007252084264e-113	4.67994693822448e-109	ZBP1	14183	distal
chr7:131056753-131059880:MKLN1	0.103	0.052	2.02930230126653	1.00183365170293	-0.597663461142813	2.4167371261943e-113	6.89615938959545e-109	MKLN1	-50216	distal
chr6:160461807-160463162:SLC22A3	0.069	0.028	2.19993141484986	0.850279476167251	-0.790297784079504	3.99893341199885e-113	1.14109564911387e-108	SLC22A3	113540	distal
chr3:68057385-68058339:FAM19A1	0.069	0.029	2.37959567037175	0.93072201384786	-0.807710195601988	6.22770073162132e-113	1.77707440376814e-108	FAM19A1	51156	distal
chr14:63857245-63858010:SYNE2	0.053	0.017	2.22012059373455	0.779212515365623	-0.855875876940026	7.48754594635697e-113	2.13657123579296e-108	SYNE2	4254	distal
chr10:88064496-88065797	0.056	0.02	2.31585950191209	0.784308353929772	-0.894017923830732	7.75364652705325e-113	2.21250303649464e-108	---	---	intergenic
chr14:91866064-91868110:TC2N	0.095	0.046	2.09155226730467	0.965013110394087	-0.653792458667135	1.04572660391388e-112	2.98398086426824e-108	TC2N	0	promoter
chr19:39941096-39942527:PSMC4	0.083	0.037	2.04786277322411	0.924958481244907	-0.662970619326286	1.10249402509479e-112	3.14596670060799e-108	PSMC4	-28478	distal
chr6:16179590-16180726:MYLIP	0.077	0.034	2.18394128018167	0.901521057635451	-0.743659813625142	1.13872929317675e-112	3.24936403807986e-108	MYLIP	50420	distal
chr12:31932069-31932875:KIAA1551	0.043	0.012	2.44469658508481	0.682277374150329	-1.03396131643288	1.43580128097531e-112	4.09705895526304e-108	KIAA1551	-26544	distal
chr12:31721773-31723899:AMN1	0.081	0.036	2.10663968625452	0.937653617425399	-0.681044232788822	2.99568893558493e-112	8.54819837769159e-108	AMN1	5111	distal
chr4:26872982-26874295:STIM2	0.094	0.044	1.98117277722286	0.975018343467944	-0.594013938030108	4.94591254080221e-112	1.41131614351791e-107	STIM2	11764	distal
chr8:60796412-60797098:CHD7	0.06	0.022	2.17043308291391	0.842409684220893	-0.783086027294946	7.06718322571726e-112	2.01662073345842e-107	CHD7	54980	distal
chr13:84136487-84137852	0.071	0.029	2.02246830910456	0.868628393484182	-0.693747518024084	1.18574745266047e-111	3.38353035616664e-107	---	---	intergenic
chr15:63841759-63842538:HERC1	0.062	0.024	2.12171947770549	0.797293103907573	-0.796515196622485	1.253547050679e-111	3.57699650911252e-107	HERC1	-7872	distal
chr21:32407702-32408513:EVA1C	0.046	0.014	2.43405360211489	0.720684594193711	-0.996929886541933	1.50678076198011e-111	4.29959890431025e-107	EVA1C	-3868	distal
chr19:991234-992280:WDR18	0.044	0.09	0.923409295984607	1.95957725359377	0.621725319104226	2.84294488511567e-111	8.11234322967758e-107	WDR18	6903	distal
chr3:109806782-109807606	0.057	0.02	2.25252001037576	0.856859245342282	-0.80869347335604	2.84821474933312e-111	8.12738078722206e-107	---	---	intergenic
chr1:8495841-8497911:RERE	0.065	0.025	1.87581635429808	0.734480331545399	-0.729468069170424	3.32113911321369e-111	9.47687045955526e-107	RERE	28028	distal
chr16:89994613-89996271:DBNDD1	0.031	0.07	0.740782890832293	1.81969021489654	0.695800387383263	3.64464889410269e-111	1.0400005619322e-106	DBNDD1	13850	distal
chr10:70616647-70617512:PRF1	0.047	0.014	2.29186450760952	0.767664949431796	-0.897060109761447	9.16371929727897e-111	2.61486730147855e-106	PRF1	-13873	distal
chr2:84845751-84847175:TRABD2A	0.074	0.032	2.28793428638207	0.936876869115794	-0.763449223147038	9.68590008781483e-111	2.76387159005796e-106	TRABD2A	33975	distal
chr1:91548188-91549832:CDC7	0.057	0.02	2.20933982990213	0.803869811373796	-0.831181341121249	1.04101649736368e-110	2.97054057522727e-106	CDC7	47081	distal
chr22:23137095-23139068:RSPH14	0.105	0.054	1.95240302891306	0.96697048302564	-0.585914367124736	1.14682002828021e-110	3.27245095069757e-106	RSPH14	3025	distal
chr12:31890496-31891512:KIAA1551	0.043	0.012	2.291928131498	0.684874860698291	-0.966291396264099	1.69203063842177e-110	4.82820942673653e-106	KIAA1551	-67907	distal
chr13:48561400-48563008:RCBTB2	0.088	0.041	1.97361389285444	0.924575741444314	-0.627676884308579	2.09981917966336e-110	5.99183402916939e-106	RCBTB2	-28145	distal
chr2:216352634-216353507:MARCH4	0.038	0.01	2.50973344128912	0.673618951147182	-1.06839037120011	2.41161434523954e-110	6.88154153414101e-106	MARCH4	18520	distal
chr9:37503585-37504430:POLR1E	0.053	0.018	2.37183300770793	0.787386725868752	-0.915681272406787	4.56656047796339e-110	1.30306803238685e-105	POLR1E	17433	distal
chr4:4348022-4349193:NSG1	0.07	0.029	2.33184296341265	0.94637662953821	-0.775529502313599	9.5583253243661e-110	2.72746813130787e-105	NSG1	0	promoter
chr7:2417693-2418764:CHST12	0.079	0.035	2.09391721769266	0.928873307946942	-0.68167620831943	1.43046538591429e-109	4.08183297870644e-105	CHST12	14106	distal
chr17:39094306-39095296:PLXDC1	0.052	0.018	2.22394969627164	0.773139054194266	-0.862523552888162	1.49122705039947e-109	4.25521638831488e-105	PLXDC1	56353	distal
chr14:92584613-92587628:RIN3	0.094	0.045	1.93606166913553	0.929834696256033	-0.605404994977049	2.42700188325163e-109	6.92544987385852e-105	RIN3	70810	distal
chr12:70049741-70050597:MYRFL	0.067	0.026	2.15787642050099	0.919084977160421	-0.718536118714939	5.70955026517041e-109	1.62922016816638e-104	MYRFL	113786	distal
chr5:32240918-32241909:GOLPH3	0.038	0.01	2.31892847194738	0.6560306404078	-1.00298817114848	7.30086226536905e-109	2.08330104742306e-104	GOLPH3	-66569	distal
chr5:32240918-32241909:MTMR12	0.038	0.01	2.31892847194738	0.6560306404078	-1.00298817114848	7.30086226536905e-109	2.08330104742306e-104	MTMR12	0	distal
chr3:108806002-108806937:TRAT1	0.074	0.032	2.09779414644038	0.889678350357452	-0.713100589332298	7.92021787434474e-109	2.26003417044427e-104	TRAT1	-15761	distal
chr16:89840957-89841883:SPIRE2	0.074	0.032	2.07127629700082	0.868699321843181	-0.716803850639972	1.57625213628698e-108	4.49783547089489e-104	SPIRE2	12411	distal
chr18:51190996-51191793:MEX3C	0.05	0.017	2.28041638832414	0.802259578601249	-0.864072133172039	1.87194056035883e-108	5.34158238898393e-104	MEX3C	5527	distal
chr19:2034645-2035794:MKNK2	0.049	0.095	0.97001812434519	2.00464731467824	0.608986754749226	2.1328504249516e-108	6.08608868759939e-104	MKNK2	6288	distal
chr6:30736778-30738093:FLOT1	0.074	0.031	2.06687223732818	0.887779161932391	-0.700078062920455	3.20364860211557e-108	9.14161128613677e-104	FLOT1	4640	distal
chr15:58614538-58615461:ADAM10	0.055	0.019	2.27458221915183	0.824889677963758	-0.843501605286699	4.61463411332197e-108	1.31678584423642e-103	ADAM10	134133	distal
chr7:44460202-44461794:NUDCD3	0.066	0.027	2.12359410615679	0.886784482958256	-0.727277354179375	6.75906431478983e-108	1.92869900222528e-103	NUDCD3	29086	distal
chr8:66490151-66491539:C8orf46	0.064	0.025	2.16722220640534	0.88293052802672	-0.750238315969615	7.76343970500345e-108	2.21529751982274e-103	C8orf46	-1669	distal
chr4:38310256-38311175	0.091	0.044	1.98184359007402	0.918395464620814	-0.636304431216184	1.37185228429172e-107	3.91458049322643e-103	---	---	intergenic
chr5:40404353-40407495	0.092	0.044	1.97811411128496	0.98231949361997	-0.587209531441932	2.07623100768336e-107	5.92452518042448e-103	---	---	intergenic
chr19:16256457-16257484:AP1M1	0.043	0.013	2.24855980103965	0.654907355895797	-0.973049808107044	3.77323465868169e-107	1.07669250985482e-102	AP1M1	58524	distal
chr8:116437233-116438477	0.035	0.008	2.21487381889513	0.590669730161858	-1.01512779326923	3.78468397111085e-107	1.07995957115648e-102	---	---	intergenic
chr20:24027121-24027980:GGTLC1	0.081	0.037	2.20864361103426	0.967287942963508	-0.705755422403607	4.11751724391815e-107	1.17493354555205e-102	GGTLC1	-38343	distal
chr10:131896228-131897663:PPP2R2D	0.077	0.034	2.05535045384604	0.969705834405387	-0.633357682519298	7.68471809062874e-107	2.19283430716091e-102	PPP2R2D	-2981	distal
chr16:57592355-57593496:ADGRG1	0.077	0.034	2.08171822240453	0.913802125063789	-0.687293282672068	7.98710689796685e-107	2.27912095333484e-102	ADGRG1	-26446	distal
chr1:159825729-159828083:SLAMF8	0.09	0.043	2.03238066756497	1.00434602013972	-0.597319282890554	1.00381825381272e-106	2.86439538725459e-102	SLAMF8	0	promoter
chr17:8958356-8959732:PIK3R5	0.07	0.029	2.12586010075131	0.920552500995509	-0.702731808829164	1.44117557069166e-106	4.11239449096865e-102	PIK3R5	5980	distal
chr13:74243415-74244563	0.049	0.016	2.26440814586607	0.775783422298258	-0.878365808618356	1.70185169438818e-106	4.85623380993666e-102	---	---	intergenic
chr7:132485289-132486280:PLXNA4	0.067	0.028	2.25568711060427	0.928193312227516	-0.75571235824342	1.86702464079792e-106	5.32755481251687e-102	PLXNA4	90190	distal
chr7:105848745-105850070:ATXN7L1	0.077	0.035	2.17461707054899	0.91734844706753	-0.727470033937397	2.16815461749876e-106	6.18682920103272e-102	ATXN7L1	26407	distal
chr10:8404511-8405281	0.058	0.022	2.2163362577464	0.834045081317462	-0.810389142390992	2.32227775748961e-106	6.6266195809966e-102	---	---	intergenic
chr8:125949491-125952238	0.087	0.042	2.08561000157297	0.959690639317964	-0.654929801789399	4.48250021276161e-106	1.27908143571152e-101	---	---	intergenic
chr4:1042523-1044406:FGFRL1	0.018	0.05	0.668283157929314	2.07794581784903	0.883603657233977	5.65197041916324e-106	1.61278975910823e-101	FGFRL1	30073	distal
chr8:124643796-124644624:MTSS1	0.065	0.026	2.21720856377586	0.878028044198978	-0.776590858804189	7.31604879698135e-106	2.08763452421863e-101	MTSS1	-74956	distal
chr10:27224853-27226408:ACBD5	0.05	0.017	2.18548216295337	0.754610339396187	-0.860361084056778	8.91043876397293e-106	2.54259370129968e-101	ACBD5	14150	distal
chr5:157180301-157181321:ITK	0.073	0.032	2.16601769141415	0.925993396942779	-0.717066560076063	1.66629095197267e-105	4.754761231454e-101	ITK	0	promoter
chr3:153165091-153166675:RAP2B	0.055	0.02	2.17400985753161	0.810123349097687	-0.810218597051475	1.99127359045928e-105	5.68209919037556e-101	RAP2B	2822	distal
chr7:150754118-150757280:GIMAP5	0.091	0.044	2.04555034004306	0.980071788507382	-0.621150214098203	2.15570420929174e-105	6.15130196121399e-101	GIMAP5	16771	distal
chr6:157143135-157143981:ARID1B	0.066	0.026	2.05810120782202	0.877830025496557	-0.703569672192355	2.3766979576709e-105	6.78190762221391e-101	ARID1B	58364	distal
chr20:32737431-32738225:COMMD7	0.049	0.016	2.38084523041784	0.801698966079363	-0.908025992567164	2.40284688671738e-105	6.85652359124804e-101	COMMD7	5230	distal
chr20:32737431-32738225:RP11-503P21.4	0.049	0.016	2.38084523041784	0.801698966079363	-0.908025992567164	2.40284688671738e-105	6.85652359124804e-101	RP11-503P21.4	0	distal
chr6:166244088-166245116:PRR18	0.044	0.014	2.2050477886758	0.699547794382354	-0.915194934558877	2.48197717515096e-105	7.08232186929326e-101	PRR18	63267	distal
chr13:111188961-111189913:ARHGEF7	0.061	0.024	2.19824877490232	0.814943247500171	-0.817357726351505	4.14343023497724e-105	1.18232781755076e-100	ARHGEF7	2108	distal
chr8:2133732-2134485:MYOM2	0.045	0.014	2.37078329292998	0.715502329588234	-0.974452794667891	4.32635735985165e-105	1.23452607263367e-100	MYOM2	88664	distal
chr17:50871197-50873235:TOB1	0.062	0.025	2.17695579718773	0.864140747574926	-0.76913422573575	5.00027420163219e-105	1.42682824343575e-100	TOB1	-3220	distal
chr1:182259012-182259987:GLUL	0.083	0.038	2.03719897061296	0.929190507673332	-0.654745807675152	6.68982570598338e-105	1.90894176520236e-100	GLUL	131359	distal
chr3:189324382-189325395:TPRG1	0.082	0.039	2.22898173817697	0.984265114963716	-0.702474486546138	6.9701863326333e-105	1.98894267001691e-100	TPRG1	152409	distal
chr20:5996635-5997433:CRLS1	0.06	0.023	2.1077982924143	0.79296055493842	-0.793549121227054	8.49914015433069e-105	2.42522964303826e-100	CRLS1	-8657	distal
chr20:5996635-5997433:MCM8	0.06	0.023	2.1077982924143	0.79296055493842	-0.793549121227054	8.49914015433069e-105	2.42522964303826e-100	MCM8	0	distal
chr6:169803417-169808381:ERMARD	0.081	0.037	2.07079334504694	0.903528311541341	-0.689935399099319	9.44388565735462e-105	2.69481277232614e-100	ERMARD	51621	distal
chr3:66306112-66307509:SLC25A26	0.039	0.011	2.39984847761486	0.67632246645583	-1.02017075028358	1.35599391372985e-104	3.86932863282814e-100	SLC25A26	62910	distal
chr7:158823416-158824549:ESYT2	0.078	0.036	2.05789826559466	0.91780957791765	-0.67308092972205	2.23925489387535e-104	6.38971383967331e-100	ESYT2	5079	distal
chrX:79258763-79259831:GPR174	0.064	0.026	2.12520675579479	0.856830418865922	-0.751109575567818	2.60838043785383e-104	7.44301357941589e-100	GPR174	87792	distal
chr2:43139569-43140454:ZFP36L2	0.045	0.014	2.38483018182041	0.787549673747401	-0.921100121952333	3.04643294455272e-104	8.69299640728118e-100	ZFP36L2	86155	distal
chr4:185587255-185588111:PDLIM3	0.025	0.063	0.84981350859694	1.91347939179899	0.655363275106048	4.1766113398662e-104	1.19179604583082e-99	PDLIM3	-51644	distal
chr4:185587255-185588111:SORBS2	0.025	0.063	0.84981350859694	1.91347939179899	0.655363275106048	4.1766113398662e-104	1.19179604583082e-99	SORBS2	0	distal
chr19:3788784-3789950:MATK	0.06	0.023	2.16742376282138	0.858494355439316	-0.76917558885104	4.44270806490522e-104	1.2677267463207e-99	MATK	0	promoter
chr2:69774544-69775981:ANXA4	0.056	0.02	2.19519520305075	0.855687530825442	-0.783950268666628	4.82067122801771e-104	1.37557853491485e-99	ANXA4	32571	distal
chr11:85823595-85824534:SYTL2	0.099	0.051	2.13340777260617	1.04261905695353	-0.617312359726194	6.69782324181465e-104	1.91122386205181e-99	SYTL2	-12437	distal
chr11:86486447-86487984:CCDC81	0.054	0.02	2.30686594841332	0.812106072873169	-0.867797156678001	7.84532902552361e-104	2.23866463743316e-99	CCDC81	91274	distal
chr11:86486447-86487984:ME3	0.054	0.02	2.30686594841332	0.812106072873169	-0.867797156678001	7.84532902552361e-104	2.23866463743316e-99	ME3	0	distal
chr12:113135305-113136532:RASAL1	0.033	0.075	1.01903411661666	2.09593563427954	0.616710188790343	9.58534132743328e-104	2.73517714778309e-99	RASAL1	0	promoter
chr7:3068556-3070430:CARD11	0.053	0.019	2.27321197231497	0.845619167793528	-0.826602141534448	9.89617320308235e-104	2.82387302349955e-99	CARD11	-24612	distal
chrX:48712755-48715440:SUV39H1	0.083	0.039	2.11768790143765	1.01138501718304	-0.632287245929715	1.35187732058224e-103	3.85758193428143e-99	SUV39H1	16161	distal
chr3:72337125-72339768:RYBP	0.015	0.044	0.58011704832607	2.04540850166703	0.946604328706466	2.89187917679487e-103	8.25197723098415e-99	RYBP	106853	distal
chr15:69713810-69714907	0.067	0.028	2.06463837298661	0.856187847427663	-0.723374126554435	3.52820386591957e-103	1.00677297314015e-98	---	---	intergenic
chr11:34650164-34651091:EHF	0.085	0.041	2.07878736558951	0.974788431673332	-0.640664133148599	4.88875986935664e-103	1.39500762872092e-98	EHF	7538	distal
chr3:195707878-195718995:MUC20	0.038	0.08	0.946934659513327	1.95408304902163	0.601505918572983	6.06999152784952e-103	1.73207208247186e-98	MUC20	-1887	distal
chr9:137150556-137151921:GRIN1	0.017	0.049	0.724687661127436	2.07670052740525	0.835048909670054	6.25404930143759e-103	1.78459296816522e-98	GRIN1	11076	distal
chr1:168520011-168522053:XCL2	0.069	0.029	2.07558345823118	0.923987603180616	-0.676760621640938	8.08788672573219e-103	2.30787847718768e-98	XCL2	21944	distal
chr12:107027296-107028160:CRY1	0.062	0.025	2.13641889611633	0.895523595557262	-0.726521841486547	8.38987799643693e-103	2.39405168628328e-98	CRY1	0	distal
chr12:107027296-107028160:MTERFD3	0.062	0.025	2.13641889611633	0.895523595557262	-0.726521841486547	8.38987799643693e-103	2.39405168628328e-98	MTERFD3	-40131	distal
chr17:50909138-50911157:TOB1	0.099	0.051	1.93527737888431	0.946201874381492	-0.592835477257752	8.73111146906442e-103	2.49142265769753e-98	TOB1	-41161	distal
chr7:151038884-151040139:ABCB8	0.012	0.038	0.614695262518414	2.32483726520654	1.04202181505028	1.95023728753188e-102	5.56500209997222e-98	ABCB8	0	distal
chr7:151038884-151040139:ASIC3	0.012	0.038	0.614695262518414	2.32483726520654	1.04202181505028	1.95023728753188e-102	5.56500209997222e-98	ASIC3	-8153	distal
chr14:99286719-99287924:BCL11B	0.055	0.02	2.24199588790291	0.858072502388302	-0.803075463875295	3.6720845207368e-102	1.04782931799225e-97	BCL11B	-15196	distal
chr5:142976831-142979043:ARHGAP26	0.081	0.037	2.00907863577776	0.96263745287617	-0.616528112518135	3.94098624008441e-102	1.12456042360809e-97	ARHGAP26	101939	distal
chr3:56923523-56924493:ARHGEF3	0.054	0.02	2.34293855164244	0.828945208464324	-0.870104980763107	4.35320399770271e-102	1.24218676074447e-97	ARHGEF3	-7053	distal
chr13:45333787-45338367:TPT1	0.067	0.028	2.01390853903783	0.869339805531546	-0.689106793482583	7.23517601590843e-102	2.06455747613947e-97	TPT1	2719	distal
chr6:127971610-127972709:PTPRK	0.079	0.036	2.07725219331714	0.956530998752209	-0.653344715142568	7.79929872551206e-102	2.22552989132487e-97	PTPRK	0	distal
chr6:127971610-127972709:THEMIS	0.079	0.036	2.07725219331714	0.956530998752209	-0.653344715142568	7.79929872551206e-102	2.22552989132487e-97	THEMIS	-52980	distal
chr21:15732216-15734305:USP25	0.09	0.044	1.95410011977264	0.966654035478644	-0.586975534648556	8.11491523123994e-102	2.31559106123432e-97	USP25	2192	distal
chr1:168535296-168536083:XCL2	0.042	0.013	2.38755193179764	0.75681339802115	-0.947282101466096	9.58781523798919e-102	2.73588307816022e-97	XCL2	7914	distal
chr5:107486324-107487413:EFNA5	0.042	0.013	2.21110731822219	0.658799401117642	-0.952931450597357	9.68334655173328e-102	2.76314293853709e-97	EFNA5	-58811	distal
chr17:58152714-58153565:OR4D1	0.042	0.013	2.44089434430842	0.77925094119712	-0.951513594401042	1.29008917314862e-101	3.68126945557959e-97	OR4D1	-1568	distal
chr19:52745746-52746528:ZNF611	0.041	0.012	2.38625906140303	0.694036644449747	-0.999227266411087	6.276082894081e-101	1.79088025382601e-96	ZNF611	-10693	distal
chr11:88843545-88845410:GRM5	0.049	0.018	2.53552372029859	0.840923812984375	-0.941494016886144	8.76981821489131e-101	2.50246762761923e-96	GRM5	0	distal
chr7:36776723-36778259:AOAH	0.068	0.03	2.18718514268634	0.877806305388472	-0.763234569773539	1.38406873828248e-100	3.94944014468907e-96	AOAH	-52175	distal
chr8:123085662-123086573:TBC1D31	0.057	0.022	2.19648251174115	0.840510720818084	-0.796379047419924	1.50853567490336e-100	4.30460654833674e-96	TBC1D31	12904	distal
chr14:52917875-52919065:FERMT2	0.073	0.032	2.04590607035977	0.931564383306297	-0.65710168610393	1.61409550530992e-100	4.60582152440186e-96	FERMT2	31503	distal
chr5:146751569-146752481:PPP2R2B	0.079	0.037	2.11095321623085	0.96949366173784	-0.659531925154887	1.74892495651592e-100	4.99055736341817e-96	PPP2R2B	126161	distal
chr18:77073438-77074319:MBP	0.055	0.021	2.21029220537658	0.81679083731213	-0.821312284306144	3.18254488309998e-100	9.08139182392579e-96	MBP	30942	distal
chr1:243507323-243508950:AKT3	0.066	0.027	2.23288038984781	0.912558304121465	-0.757316402731626	3.68580416219715e-100	1.05174421768296e-95	AKT3	0	distal
chr1:160637717-160638919:SLAMF1	0.063	0.026	2.11876945181131	0.854841662597657	-0.749680871248908	4.29497232783967e-100	1.22557035374905e-95	SLAMF1	8039	distal
chr8:66467442-66468504:ADHFE1	0.065	0.027	2.18818694933356	0.903044017048251	-0.744427297492582	5.7869768909933e-100	1.65131385584494e-95	ADHFE1	0	distal
chr8:66467442-66468504:C8orf46	0.065	0.027	2.18818694933356	0.903044017048251	-0.744427297492582	5.7869768909933e-100	1.65131385584494e-95	C8orf46	-24704	distal
chr2:172495874-172496844:ITGA6	0.045	0.015	2.71958322352885	0.803450390160513	-1.0443812399119	6.47040797701449e-100	1.84633091624108e-95	ITGA6	0	distal
chr2:172495874-172496844:PDK1	0.045	0.015	2.71958322352885	0.803450390160513	-1.0443812399119	6.47040797701449e-100	1.84633091624108e-95	PDK1	-59125	distal
chr8:1831059-1834043:ARHGEF10	0.01	0.037	0.645904335091139	2.24196957781031	0.977990068447531	7.94860858784903e-100	2.26813546054272e-95	ARHGEF10	4949	distal
chr8:1831059-1834043:RP11-439C15.6	0.01	0.037	0.645904335091139	2.24196957781031	0.977990068447531	7.94860858784903e-100	2.26813546054272e-95	RP11-439C15.6	0	distal
chr8:73346178-73347101:RDH10	0.042	0.013	2.17821894110348	0.70731508039255	-0.896489184052072	9.20740272965423e-100	2.62733236890683e-95	RDH10	49163	distal
chr20:62675215-62675992:SLCO4A1	0.011	0.036	0.58720992663724	2.3191150325573	1.06430567694248	1.14669817992913e-99	3.27210325642777e-95	SLCO4A1	18857	distal
chr14:91062739-91063760:RPS6KA5	0.059	0.024	2.15051227882807	0.85808080605621	-0.76177318799922	1.16613128120145e-99	3.32755561090834e-95	RPS6KA5	-2132	distal
chr2:119929322-119930025:EPB41L5	0.041	0.012	2.46603327534644	0.812500845815262	-0.935303836660216	1.43291114991873e-99	4.08881196629308e-95	EPB41L5	-82980	distal
chr2:119929322-119930025:PTPN4	0.041	0.012	2.46603327534644	0.812500845815262	-0.935303836660216	1.43291114991873e-99	4.08881196629308e-95	PTPN4	0	distal
chr22:50010522-50012095:IL17REL	0.02	0.053	0.816370706820483	2.11272910076106	0.777121349983265	1.83699279691265e-99	5.24185894599026e-95	IL17REL	564	distal
chr9:132451101-132451794:CFAP77	0.053	0.019	2.15982969707516	0.861660792139537	-0.763256577139666	1.99896173324894e-99	5.70403730582586e-95	CFAP77	40874	distal
chr13:40221197-40222551	0.08	0.037	2.01622059847345	0.948466917024446	-0.630402511172843	2.58929323900933e-99	7.38854825751312e-95	---	---	intergenic
chrX:71992422-71993338:NHSL2	0.081	0.038	2.11691045930981	0.990689686185016	-0.646848363120134	4.67196364918938e-99	1.33314482729619e-94	NHSL2	-76321	distal
chr5:59123463-59126432:PDE4D	0.064	0.027	2.18642189892047	0.919847802565516	-0.730945355174219	5.51570293371313e-99	1.57390583213504e-94	PDE4D	-83952	distal
chr20:52409774-52411317	0.103	0.056	2.08032775125163	1.03514183035039	-0.597954523544976	7.7170338644693e-99	2.20205561322632e-94	---	---	intergenic
chr18:63212935-63213916:BCL2	0.036	0.01	2.54121311939078	0.663648693384884	-1.08989285447076	8.32133453453577e-99	2.37449280942978e-94	BCL2	104896	distal
chr7:36863882-36865539:ELMO1	0.056	0.021	2.241453860221	0.877216720468628	-0.788045821634847	9.82985693367978e-99	2.80494967602552e-94	ELMO1	119521	distal
chr19:39073299-39074113:ACP7	0.079	0.037	2.13821746007993	0.964477008460063	-0.675800042975979	1.10312409081018e-98	3.14776459312685e-94	ACP7	-10192	distal
chr1:111475610-111477596:C1orf162	0.072	0.032	2.0674860081537	0.916958672601186	-0.678237528766082	1.2797418399245e-98	3.65174334022455e-94	C1orf162	1742	distal
chr4:83125468-83126370:PLAC8	0.059	0.024	2.13877862079321	0.850778157237039	-0.762071301174457	1.50059930885376e-98	4.28196012781419e-94	PLAC8	-10667	distal
chr12:120480221-120481646:DYNLL1	0.049	0.017	2.14056856174451	0.778857295194401	-0.82007498685513	2.50926479017065e-98	7.16018707875196e-94	DYNLL1	10339	distal
chr6:90233215-90234900:BACH2	0.052	0.02	2.45090155235903	0.798586269442301	-0.940109956819362	2.74083793625474e-98	7.82098105110291e-94	BACH2	61842	distal
chr22:48097783-48099294	0.064	0.027	1.9743131675081	0.826175681576584	-0.703730995747522	2.89829737181483e-98	8.27029155047362e-94	---	---	intergenic
chr11:126329289-126330177:DCPS	0.06	0.024	2.22681328366216	0.930807481109831	-0.740905778353352	4.20439783981274e-98	1.19972492359056e-93	DCPS	0	distal
chr11:126329289-126330177:ST3GAL4	0.06	0.024	2.22681328366216	0.930807481109831	-0.740905778353352	4.20439783981274e-98	1.19972492359056e-93	ST3GAL4	-25483	distal
chr10:96670455-96671965:PIK3AP1	0.068	0.029	2.05876301145093	0.971602564478846	-0.633579570646193	5.71950488093182e-98	1.63206071777389e-93	PIK3AP1	-845	promoter
chr10:6583220-6583984:PRKCQ	0.041	0.013	2.56690849882048	0.715627131034013	-1.05593817098095	5.93364814059503e-98	1.69316649691879e-93	PRKCQ	-2920	distal
chr15:95864290-95865915	0.037	0.01	2.39024714979472	0.663986045912347	-1.02674711481947	7.43783943829172e-98	2.12238748371654e-93	---	---	intergenic
chr8:120749137-120750082:SNTB1	0.069	0.03	2.13257056226982	0.938155964522678	-0.692662337211618	8.48339309701686e-98	2.42073622023376e-93	SNTB1	62061	distal
chr9:132486703-132488027:CFAP77	0.087	0.043	2.03325119111227	0.993266828051072	-0.605730127058855	9.76539397872599e-98	2.78655517182946e-93	CFAP77	76476	distal
chr1:239718766-239720301:CHRM3	0.052	0.019	2.31525105329201	0.845089294215452	-0.845427487050026	1.02488493043956e-97	2.92450914900928e-93	CHRM3	86561	distal
chr14:38073534-38075267:SSTR1	0.05	0.018	2.13445735851756	0.793094877382489	-0.805763876306145	1.46206473924959e-97	4.1720017334487e-93	SSTR1	-132732	distal
chr2:36800199-36801450:VIT	0.067	0.028	2.1698466108162	0.942192688133429	-0.706726689893863	2.48762796092272e-97	7.09844638649297e-93	VIT	103323	distal
chr22:42828298-42828942:ARFGAP3	0.039	0.011	2.39477429094331	0.725263299925118	-0.976499102247209	3.10162457520661e-97	8.85048572535206e-93	ARFGAP3	28297	distal
chr5:68279735-68280802:PIK3R1	0.083	0.041	2.08979784278931	0.969223340714173	-0.64988570484664	3.31257329722588e-97	9.45242790363404e-93	PIK3R1	-7566	distal
chr19:50325260-50326193:KCNC3	0.038	0.079	0.982016368741669	1.99821232415696	0.597133676860774	4.59846296476074e-97	1.31217140699448e-92	KCNC3	3053	distal
chr2:177251681-177253301:NFE2L2	0.064	0.027	2.05492256621716	0.900027736832829	-0.685115332859079	7.68871152882324e-97	2.19397383474971e-92	NFE2L2	10153	distal
chr18:23992262-23993374:TTC39C	0.101	0.054	2.08920051043041	1.04240322363925	-0.596965794922493	8.21871478801933e-97	2.34521026476132e-92	TTC39C	0	promoter
chr10:92747377-92748173:HHEX	0.039	0.011	2.16305415981173	0.646922623235834	-0.941545483760527	1.03283832616141e-96	2.94720416370158e-92	HHEX	55346	distal
chr1:202201106-202202150:LGR6	0.037	0.01	2.32310586856934	0.676980055408343	-0.986666724800284	1.55880123013767e-96	4.44803931019785e-92	LGR6	-1586	distal
chr10:124657561-124659918:FAM53B	0.088	0.044	2.03053259643064	1.00156095096321	-0.598445811335883	2.05993470944853e-96	5.87802369341138e-92	FAM53B	83052	distal
chr10:124657561-124659918:RP11-12J10.3	0.088	0.044	2.03053259643064	1.00156095096321	-0.598445811335883	2.05993470944853e-96	5.87802369341138e-92	RP11-12J10.3	0	distal
chr1:185439566-185440647:IVNS1ABP	0.053	0.02	1.7663987739939	0.691853755460195	-0.709404268032616	2.49927611508204e-96	7.13168439438661e-92	IVNS1ABP	-122238	distal
chr4:98706052-98706847:TSPAN5	0.038	0.011	2.33657979134133	0.655087778916292	-1.01146227147605	3.0285832418214e-96	8.64206228053737e-92	TSPAN5	-47424	distal
chr20:56460303-56460993:CASS4	0.052	0.02	2.24698318849751	0.802368351768011	-0.849206028710916	3.41329680853247e-96	9.73984244314741e-92	CASS4	0	distal
chr20:56460303-56460993:RTFDC1	0.052	0.02	2.24698318849751	0.802368351768011	-0.849206028710916	3.41329680853247e-96	9.73984244314741e-92	RTFDC1	-7592	distal
chr2:46439411-46440197:TMEM247	0.034	0.009	2.18023961751654	0.569687446490381	-1.01865814981795	3.89030030759094e-96	1.11009719277107e-91	TMEM247	-39368	distal
chr19:29262920-29263877:UQCRFS1	0.049	0.017	2.38053422943096	0.829014345931789	-0.886184864205551	5.25758788914161e-96	1.50025270416656e-91	UQCRFS1	-49380	distal
chr2:176852492-176853218	0.043	0.014	2.32336999325654	0.771187367541532	-0.907930080602229	5.72650560275611e-96	1.63405837374646e-91	---	---	intergenic
chr14:91078243-91078937:RPS6KA5	0.042	0.014	2.42470463645497	0.743558835447397	-0.973944520351546	7.59442010080871e-96	2.16706777576576e-91	RPS6KA5	-17636	distal
chr16:3214861-3216529:OR1F1	0.096	0.05	2.14550331401846	1.07440448712156	-0.600593650156496	9.24116864756359e-96	2.63696747358227e-91	OR1F1	10615	distal
chr11:47863068-47863788:NUP160	0.033	0.009	2.34948483353231	0.580979027618646	-1.08312098953333	1.07759744716422e-95	3.0749243154831e-91	NUP160	-14514	distal
chr2:169106886-169108711:DHRS9	0.04	0.012	2.15561566408122	0.655083766148864	-0.931017268322774	1.5608913726599e-95	4.45400353188504e-91	DHRS9	25780	distal
chr19:8525410-8527017:MYO1F	0.023	0.056	0.855557949008178	2.26702051097718	0.816122455265369	1.88782948793709e-95	5.38692144382848e-91	MYO1F	0	distal
chr19:8525410-8527017:ZNF414	0.023	0.056	0.855557949008178	2.26702051097718	0.816122455265369	1.88782948793709e-95	5.38692144382848e-91	ZNF414	-11251	distal
chr2:96556502-96557538:ARID5A	0.011	0.037	0.610130706049578	2.19586879115654	0.9890303713613	3.58443579801244e-95	1.02281875496285e-90	ARID5A	19158	distal
chr1:100028428-100029405:MFSD14A	0.043	0.014	2.16813529281153	0.725985359339025	-0.876213719012758	3.83612512195388e-95	1.09463830354954e-90	MFSD14A	-8692	distal
chr1:100028428-100029405:RP4-714D9.5	0.043	0.014	2.16813529281153	0.725985359339025	-0.876213719012758	3.83612512195388e-95	1.09463830354954e-90	RP4-714D9.5	0	distal
chr1:100028428-100029405:SLC35A3	0.043	0.014	2.16813529281153	0.725985359339025	-0.876213719012758	3.83612512195388e-95	1.09463830354954e-90	SLC35A3	0	distal
chr2:24739278-24740101:CENPO	0.041	0.013	2.36086318973632	0.79082754504822	-0.908205402340548	4.20028111612752e-95	1.19855021648699e-90	CENPO	-53044	distal
chr2:24739278-24740101:NCOA1	0.041	0.013	2.36086318973632	0.79082754504822	-0.908205402340548	4.20028111612752e-95	1.19855021648699e-90	NCOA1	0	distal
chr5:35830381-35831341:IL7R	0.044	0.015	2.61813550227334	0.770712228251065	-1.03091667120702	4.91389833302318e-95	1.40218088932817e-90	IL7R	-25508	distal
chr18:23306718-23308443:TMEM241	0.057	0.022	2.16571085140873	0.884060892798291	-0.748683895547389	5.05723236041213e-95	1.4430812540436e-90	TMEM241	129426	distal
chr18:23828312-23828946:LAMA3	0.05	0.018	2.17429020307662	0.802446895319066	-0.816477275067451	5.28094941111686e-95	1.5069189144622e-90	LAMA3	-43894	distal
chr18:44724504-44726198:SETBP1	0.064	0.027	2.02759278944371	0.888366511995344	-0.681032372463049	7.85792265039142e-95	2.24225822828919e-90	SETBP1	23167	distal
chr2:234452137-234455001:ARL4C	0.068	0.03	2.17485660840385	0.963190321275287	-0.693491392899294	1.00517414458265e-94	2.8682644215666e-90	ARL4C	41599	distal
chr11:115222128-115223233:CADM1	0.057	0.022	1.97433514256153	0.824141395127502	-0.705349654930182	1.05675996970706e-94	3.0154645735591e-90	CADM1	17188	distal
chr11:86503790-86504653:CCDC81	0.037	0.011	2.32130379619591	0.676449916696299	-0.986340306877833	1.52447399350343e-94	4.35008654046203e-90	CCDC81	108617	distal
chr11:86503790-86504653:ME3	0.037	0.011	2.32130379619591	0.676449916696299	-0.986340306877833	1.52447399350343e-94	4.35008654046203e-90	ME3	0	distal
chr19:17830648-17831463:INSL3	0.017	0.047	0.792487856282716	2.19002145330482	0.831602781318965	1.56649461221273e-94	4.46999237594902e-90	INSL3	-9075	distal
chr19:17830648-17831463:JAK3	0.017	0.047	0.792487856282716	2.19002145330482	0.831602781318965	1.56649461221273e-94	4.46999237594902e-90	JAK3	0	distal
chr1:12150198-12151381:TNFRSF1B	0.076	0.036	2.06693560040962	0.974433672395452	-0.635358969350552	1.56950227894682e-94	4.47857475297474e-90	TNFRSF1B	-15622	distal
chr8:124757034-124758034:MTSS1	0.046	0.016	2.08807017256796	0.758242010382272	-0.812571874857294	1.58201276793563e-94	4.51427343330433e-90	MTSS1	-28606	distal
chr20:52404607-52406351	0.045	0.015	2.04224105356497	0.736455783715361	-0.808988795202466	1.71625251096732e-94	4.89732654004525e-90	---	---	intergenic
chr1:28199180-28200359:DNAJC8	0.082	0.04	1.96752966772258	0.936005716371166	-0.616179240797356	1.80334147944781e-94	5.14583491160432e-90	DNAJC8	0	distal
chr1:28199180-28200359:PTAFR	0.082	0.04	1.96752966772258	0.936005716371166	-0.616179240797356	1.80334147944781e-94	5.14583491160432e-90	PTAFR	-5245	distal
chr3:183349257-183350757:MCF2L2	0.044	0.015	2.30995029904639	0.764746858750655	-0.907348300947094	1.84325313396715e-94	5.25972281777526e-90	MCF2L2	77220	distal
chrY:7239879-7240702	0.047	0.017	2.07681494716713	0.659621173249288	-0.890583708248901	2.02865625059269e-94	5.78877061106624e-90	---	---	intergenic
chr1:53135294-53137066:SLC1A7	0.044	0.015	2.2770518474571	0.785805957746484	-0.87582316998007	3.35963428949281e-94	9.58671644506772e-90	SLC1A7	5511	distal
chr11:12673759-12675226:TEAD1	0.04	0.081	0.972396615006201	2.02181678671441	0.615466510274236	5.17366463911057e-94	1.4763052047702e-89	TEAD1	0	promoter
chr16:82655127-82656100:CDH13	0.069	0.031	2.11165821617332	0.901976627526611	-0.710184086009177	1.07131088308273e-93	3.05698560487656e-89	CDH13	28089	distal
chr14:99055536-99056442	0.061	0.026	2.25291937617064	0.936620104623576	-0.748194088833092	1.08977142638138e-93	3.10966276517928e-89	---	---	intergenic
chr6:108895509-108896716:ARMC2	0.053	0.019	1.88470773904395	0.777601307370463	-0.698493378333755	1.18857687374833e-93	3.39160410924087e-89	ARMC2	47088	distal
chr4:83114461-83115967:PLAC8	0.055	0.022	2.24212661779679	0.881213807727595	-0.785276608435407	2.31864747282843e-93	6.61626056371592e-89	PLAC8	0	promoter
chr2:97720858-97721745:ZAP70	0.05	0.018	2.25249794188164	0.879692384915318	-0.791051562486582	2.50501677888845e-93	7.14806537855818e-89	ZAP70	7299	distal
chr22:44492943-44493900:LDOC1L	0.048	0.017	2.27163868659012	0.830721099496616	-0.837601407591337	2.73710849174899e-93	7.81033908120574e-89	LDOC1L	4398	distal
chr19:18474731-18476510:ELL	0.069	0.031	2.05081438498414	0.934591959299699	-0.657165099600507	2.89826896254089e-93	8.27021048461043e-89	ELL	0	promoter
chr7:158803146-158805027:ESYT2	0.056	0.022	2.10376369297749	0.827061378327654	-0.764493620503251	2.93658032055781e-93	8.3795319447117e-89	ESYT2	24601	distal
chr3:12915758-12916744:IQSEC1	0.055	0.022	2.23869169677595	0.849192488177522	-0.808515731954055	3.21810716762126e-93	9.18286880280727e-89	IQSEC1	50924	distal
chr5:148855390-148856327:ADRB2	0.045	0.015	2.22493229965072	0.772633549716851	-0.86337455084847	3.85657974835498e-93	1.10047503119309e-88	ADRB2	30146	distal
chr10:22645988-22647618:PIP4K2A	0.058	0.024	2.08568565191962	0.846620924648359	-0.740703358222157	5.32013947649866e-93	1.51810179961889e-88	PIP4K2A	-54276	distal
chr2:47888444-47889138:FBXO11	0.043	0.014	2.34283012636243	0.798262909376055	-0.89446608196956	8.92735399574557e-93	2.547420462686e-88	FBXO11	0	promoter
chr13:114339716-114340730:CHAMP1	0.085	0.042	1.97255146117143	0.97542812096631	-0.589536433737597	1.32630166128474e-92	3.784601790476e-88	CHAMP1	17517	distal
chr11:121485031-121485744:SORL1	0.04	0.013	2.4044902697995	0.795812800307582	-0.922801841863006	1.94027881747608e-92	5.536585605668e-88	SORL1	32829	distal
chr8:38368344-38369046:NSD3	0.041	0.014	2.29423701354995	0.706290286353714	-0.949081248552471	2.34748444086165e-92	6.69854685199872e-88	NSD3	12800	distal
chr4:121066-122075:ZNF718	0.043	0.015	2.24461445669389	0.7385570125903	-0.900156681069556	2.87961564322802e-92	8.21698323795114e-88	ZNF718	-2405	distal
chr19:47471668-47472490:SLC8A2	0.027	0.062	0.928946399451341	2.09220512701188	0.680822971125908	4.40875917573967e-92	1.25803943079732e-87	SLC8A2	0	promoter
chr1:7929630-7931712:TNFRSF9	0.057	0.023	1.93600477397912	0.833676857518854	-0.679114893808601	5.29460536683176e-92	1.51081564142544e-87	TNFRSF9	9154	distal
chr16:84013775-84014743:SLC38A8	0.023	0.055	0.83732686853672	2.13895521861436	0.772676136016321	6.10205432858167e-92	1.74122120266078e-87	SLC38A8	27414	distal
chr18:32040431-32041508:RNF125	0.055	0.021	2.055879191537	0.860267737774051	-0.716077235070006	1.37841148827663e-91	3.93329718179736e-87	RNF125	22060	distal
chr1:100396406-100398191:CDC14A	0.066	0.028	2.00261360151316	0.951132755524058	-0.621906887599567	1.54000838591063e-91	4.39441392919599e-87	CDC14A	43458	distal
chr12:10497442-10498139:EIF2S3L	0.046	0.016	2.24667297918548	0.799196981389971	-0.851608930883784	2.96616870469347e-91	8.46396239884283e-87	EIF2S3L	-7463	distal
chr1:198788395-198789128:PTPRC	0.04	0.012	2.32919371952306	0.793569133785248	-0.892339465051713	3.19213341092367e-91	9.1087526880707e-87	PTPRC	149299	distal
chr10:88090709-88092257	0.077	0.037	1.92626403996796	0.909321450538844	-0.61599993808668	4.35289558841423e-91	1.242098756154e-86	---	---	intergenic
chr5:80754966-80756200:DHFR	0.039	0.012	2.20520672624983	0.711115109358725	-0.905480593943476	9.41610934739154e-91	2.68688680227818e-86	DHFR	-99984	distal
chr5:80754966-80756200:MSH3	0.039	0.012	2.20520672624983	0.711115109358725	-0.905480593943476	9.41610934739154e-91	2.68688680227818e-86	MSH3	0	distal
chr16:89821395-89822132:FANCA	0.05	0.019	2.13521510758613	0.816337795197821	-0.787531895747246	2.08914260356243e-90	5.96136841926541e-86	FANCA	-4739	distal
chr4:36189497-36190344:ARAP2	0.039	0.012	2.18290243442005	0.762269170809316	-0.852908634871733	2.72107465756593e-90	7.76458653536437e-86	ARAP2	-27998	distal
chr19:38924212-38925071:CTC-360G5.8	0.045	0.016	2.20711878336334	0.778847600576234	-0.850334872738199	3.57240326488941e-90	1.01938527163619e-85	CTC-360G5.8	0	distal
chr19:38924212-38925071:SARS2	0.045	0.016	2.20711878336334	0.778847600576234	-0.850334872738199	3.57240326488941e-90	1.01938527163619e-85	SARS2	5062	distal
chr10:103910669-103911678:OBFC1	0.078	0.038	2.14693116753301	1.02056323769536	-0.639188118731302	3.84305184971792e-90	1.09661484531701e-85	OBFC1	5991	distal
chr1:149585526-149586114:PPIAL4C	0.042	0.014	2.3807150733627	0.834991031167302	-0.881555419362374	4.7650933497909e-90	1.35971938736283e-85	PPIAL4C	1662	distal
chr5:98933104-98934153:CHD1	0.075	0.035	1.88587081117959	0.904123685136251	-0.599879523570568	6.67627467951818e-90	1.90507497980051e-85	CHD1	-4148	distal
chr7:2902400-2904106:GNA12	0.062	0.027	2.08505107531683	0.891002046729103	-0.706143449670833	6.81122597935871e-90	1.94358333321001e-85	GNA12	-58077	distal
chr8:139705505-139706374:KCNK9	0.029	0.062	0.854826108488199	2.05265319533982	0.718779758397027	9.78334488749039e-90	2.79167746364538e-85	KCNK9	-2450	distal
chr14:61451571-61453221:PRKCH	0.066	0.03	2.12461145784329	0.956300495831063	-0.675548812088235	1.03963729491628e-89	2.96660502104362e-85	PRKCH	-32314	distal
chr14:89466284-89467359:FOXN3	0.059	0.025	2.13676348651897	0.911287758250581	-0.714731750497351	1.07540820983545e-89	3.06867732676545e-85	FOXN3	-49173	distal
chr18:63199459-63200561:BCL2	0.065	0.029	2.23179547474623	0.93849719075983	-0.737397255182847	1.20216682478575e-89	3.43038303452613e-85	BCL2	118251	distal
chr5:132026338-132027463:ACSL6	0.039	0.013	2.20133318863892	0.688640202434191	-0.922810870933394	1.30693961718642e-89	3.72935219764144e-85	ACSL6	-14253	distal
chr7:21355092-21356245:SP4	0.058	0.024	1.91465989369446	0.799607142042982	-0.695645550196109	1.30871598263157e-89	3.73442105643919e-85	SP4	-71789	distal
chr10:110441475-110442319:DUSP5	0.054	0.021	2.17766040893545	0.870385488757274	-0.764629312617275	1.91474904846892e-89	5.46373640980606e-85	DUSP5	-55519	distal
chr19:54551043-54552214:KIR3DX1	0.042	0.014	2.25214146190273	0.729062889245044	-0.911399669792824	2.05851492526429e-89	5.87397233924164e-85	KIR3DX1	18284	distal
chr15:77021472-77022677:PSTPIP1	0.049	0.019	2.19562220792734	0.770284158460314	-0.85211590625534	2.26761806506517e-89	6.47064814866346e-85	PSTPIP1	25899	distal
chr2:176931677-176932637	0.054	0.021	1.98652417441348	0.859408721592368	-0.683623471956099	2.70898755767248e-89	7.73009599581843e-85	---	---	intergenic
chr18:12307085-12309255:TUBB6	0.041	0.079	0.9227138468761	1.94576002621063	0.615495841622728	6.12918471523453e-89	1.74896285849217e-84	TUBB6	0	promoter
chr1:67170646-67172453:C1orf141	0.047	0.017	2.15633132232951	0.810145731294707	-0.802142803476333	6.56840193158143e-89	1.87429349117676e-84	C1orf141	0	distal
chr1:67170646-67172453:IL23R	0.047	0.017	2.15633132232951	0.810145731294707	-0.802142803476333	6.56840193158143e-89	1.87429349117676e-84	IL23R	4247	distal
chr11:85755320-85756872:SYTL2	0.058	0.025	2.20147778045962	0.876955266890084	-0.770343730007524	1.28694854950487e-88	3.67230768601214e-84	SYTL2	853	distal
chr18:48841275-48843511:CTIF	0.077	0.037	2.04452027381057	0.980535463353186	-0.620324385759062	1.67412485782723e-88	4.77711528181001e-84	CTIF	0	distal
chr18:48841275-48843511:SMAD7	0.077	0.037	2.04452027381057	0.980535463353186	-0.620324385759062	1.67412485782723e-88	4.77711528181001e-84	SMAD7	105822	distal
chr1:55127699-55128994:USP24	0.047	0.017	2.0918998694123	0.841470511051607	-0.747635304228895	1.80359899544698e-88	5.14656973350797e-84	USP24	86119	distal
chr15:90013291-90014081:ZNF710	0.043	0.015	2.18591131519287	0.826729535616113	-0.802443062467171	1.81305688910328e-88	5.1735578330562e-84	ZNF710	11900	distal
chr6:139159916-139162545:HECA	0.09	0.048	2.07520134553713	1.01863507511094	-0.607300745806346	2.15586116303858e-88	6.15174982873059e-84	HECA	24805	distal
chr10:4234469-4235287	0.052	0.02	2.10328489486449	0.866998813869158	-0.733075137539778	2.41782492699755e-88	6.89926342918751e-84	---	---	intergenic
chr1:109687319-109688565:GSTM1	0.03	0.067	1.08997587110575	2.2072402664409	0.617846149140775	2.5511177943077e-88	7.27961462605701e-84	GSTM1	0	promoter
chr1:109687319-109688565:GSTM2	0.03	0.067	1.08997587110575	2.2072402664409	0.617846149140775	2.5511177943077e-88	7.27961462605701e-84	GSTM2	0	distal
chr6:161226001-161227193:AGPAT4	0.045	0.016	2.13031163183578	0.796473026806096	-0.801139014772771	2.94885273641746e-88	8.41455128336721e-84	AGPAT4	46832	distal
chr5:54609980-54611384:SNX18	0.062	0.026	1.80441012566215	0.832661313725378	-0.613757156758757	2.95523617408858e-88	8.43276642276175e-84	SNX18	92116	distal
chr13:99218639-99219638:UBAC2	0.071	0.033	2.15724569109622	1.00697729809193	-0.653642235154735	3.3175732263952e-88	9.46669520151869e-84	UBAC2	17731	distal
chr15:64430049-64430915:TRIP4	0.06	0.025	2.12630554297214	0.964790817680712	-0.670083060531253	3.41659225059598e-88	9.74924598707563e-84	TRIP4	0	distal
chr15:64430049-64430915:ZNF609	0.06	0.025	2.12630554297214	0.964790817680712	-0.670083060531253	3.41659225059598e-88	9.74924598707563e-84	ZNF609	-29827	distal
chr11:118692096-118693983:TREH	0.09	0.047	2.05988357214954	1.02995951580597	-0.592025804230609	3.64088717005383e-88	1.03892715397486e-83	TREH	-12424	distal
chr9:5841288-5842566:ERMP1	0.086	0.045	2.09409687923467	1.00928997882815	-0.622832582223526	4.1277310297476e-88	1.17784804933848e-83	ERMP1	-8172	distal
chr10:74585205-74586638:ADK	0.068	0.032	2.09133409127654	0.927628242541831	-0.681402735801501	5.23800689035129e-88	1.49466526616174e-83	ADK	0	distal
chr16:29640699-29641994:SPN	0.053	0.021	2.18577395803544	0.851292863370096	-0.783110767242931	7.19652166614144e-88	2.05352745743346e-83	SPN	-20985	distal
chr3:4834106-4835092:BHLHE40	0.056	0.023	2.19125468541145	0.85483033092744	-0.782836527259623	7.25413201066428e-88	2.06996656924305e-83	BHLHE40	-144024	distal
chr3:4834106-4835092:ITPR1	0.056	0.023	2.19125468541145	0.85483033092744	-0.782836527259623	7.25413201066428e-88	2.06996656924305e-83	ITPR1	0	distal
chr6:11258014-11259053:NEDD9	0.046	0.017	2.17920407453588	0.825636104169013	-0.800266398623985	7.84249412643901e-88	2.23785569897937e-83	NEDD9	-25333	distal
chr4:970057-971326:DGKQ	0.076	0.037	2.05144559377688	0.971643844889887	-0.63009389913934	7.96135188735672e-88	2.27177176105724e-83	DGKQ	2230	distal
chr8:109644149-109645428:SYBU	0.025	0.059	0.818057042985991	1.78780070037432	0.616729960805128	8.1810009585982e-88	2.334448623536e-83	SYBU	0	promoter
chr19:40969846-40971227:CYP2B6	0.054	0.023	2.35527469711256	0.888306197216758	-0.829338161973874	1.4239157918551e-87	4.06314371205852e-83	CYP2B6	-20023	distal
chr9:125409393-125410889:GAPVD1	0.01	0.034	0.69033141599108	2.37095055905138	0.995849330568424	1.83079869527892e-87	5.22418407697841e-83	GAPVD1	107285	distal
chr3:188553527-188554152:LPP	0.04	0.013	2.30520169066868	0.80278541130387	-0.874510630360687	2.35605146099962e-87	6.72299284396241e-83	LPP	0	distal
chr10:96650845-96652894:PIK3AP1	0.069	0.031	1.99743128851175	0.959435021212805	-0.613288951382122	3.48240167702129e-87	9.93703318538025e-83	PIK3AP1	16717	distal
chr18:79326278-79328404:ATP9B	0.065	0.029	2.12243249998816	0.985502540011619	-0.653166177855083	3.49872275363767e-87	9.9836053775051e-83	ATP9B	0	distal
chr18:79326278-79328404:NFATC1	0.065	0.029	2.12243249998816	0.985502540011619	-0.653166177855083	3.49872275363767e-87	9.9836053775051e-83	NFATC1	-67452	distal
chr16:48458047-48458861:SIAH1	0.06	0.025	2.0520096967982	0.945315049335973	-0.64975572316657	4.50901378627612e-87	1.28664708391389e-82	SIAH1	-72598	distal
chr19:29587299-29588115:POP4	0.06	0.026	2.16866240883961	0.951504543815638	-0.699287140425667	5.24665410126356e-87	1.49713274779556e-82	POP4	-15902	distal
chr6:166416841-166417966:MPC1	0.086	0.045	2.0754493818663	1.03846909140993	-0.593311149227164	6.11384687969423e-87	1.74458620712075e-82	MPC1	-33829	distal
chr6:166416841-166417966:RPS6KA2	0.086	0.045	2.0754493818663	1.03846909140993	-0.593311149227164	6.11384687969423e-87	1.74458620712075e-82	RPS6KA2	0	distal
chr1:64922244-64923902:JAK1	0.057	0.024	2.0369139292054	0.881198793605269	-0.690953708774148	6.17666375398678e-87	1.76251100220013e-82	JAK1	42602	distal
chr18:49819601-49820951:ACAA2	0.052	0.021	2.12719694980694	0.835248957502516	-0.768894299942207	1.04315976589894e-86	2.97665639199263e-82	ACAA2	-5642	distal
chr18:49819601-49820951:RP11-886H22.1	0.052	0.021	2.12719694980694	0.835248957502516	-0.768894299942207	1.04315976589894e-86	2.97665639199263e-82	RP11-886H22.1	0	distal
chr2:196182258-196184414:STK17B	0.054	0.022	2.09787765152309	0.85920640989433	-0.736593219264693	1.10306820542259e-86	3.14760512417335e-82	STK17B	-5756	distal
chr5:76325496-76326745:IQGAP2	0.046	0.017	2.24136480060326	0.841201386020323	-0.815953964734234	1.13602239081047e-86	3.24163989217768e-82	IQGAP2	-76504	distal
chr5:76325496-76326745:SV2C	0.046	0.017	2.24136480060326	0.841201386020323	-0.815953964734234	1.13602239081047e-86	3.24163989217768e-82	SV2C	0	distal
chr7:105345796-105347317:SRPK2	0.059	0.025	1.99490969154366	0.902375770604276	-0.654710255078431	1.13645086536944e-86	3.24286254433169e-82	SRPK2	41577	distal
chr7:150556456-150557271:GIMAP4	0.055	0.022	2.25358535711826	0.929179542622969	-0.754042986336431	1.18719464096651e-86	3.38765990799792e-82	GIMAP4	-10006	distal
chr1:185559688-185562269:HMCN1	0.066	0.03	2.09319360602973	0.939927151159522	-0.673094659126909	1.25021513261267e-86	3.56748888091025e-82	HMCN1	-172282	distal
chr1:145689333-145691206:PDZK1	0.056	0.023	2.24362586128958	0.967980163974664	-0.720891741022894	1.28081334709437e-86	3.65480088593379e-82	PDZK1	596	distal
chr1:10497041-10498782:PEX14	0.045	0.016	2.09541085330953	0.784276445455455	-0.794791755407278	1.78481834351979e-86	5.09297914323372e-82	PEX14	22155	distal
chr17:74473875-74474980:CD300A	0.047	0.018	2.14889903860646	0.790147017421255	-0.814769426915764	1.91929443138146e-86	5.476706659947e-82	CD300A	7014	distal
chr3:114222974-114223666:ZNF80	0.04	0.013	2.16197740002208	0.732461566953163	-0.868003708315692	1.94372140455378e-86	5.54640902789422e-82	ZNF80	13435	distal
chr6:89952068-89953383:BACH2	0.06	0.025	2.01565599680052	0.894624496924195	-0.670559922940095	2.18977375935237e-86	6.24851942231198e-82	BACH2	0	distal
chr6:89952068-89953383:GJA10	0.06	0.025	2.01565599680052	0.894624496924195	-0.670559922940095	2.18977375935237e-86	6.24851942231198e-82	GJA10	57600	distal
chr3:114220465-114222258:ZNF80	0.058	0.024	2.07083800541361	0.902854264600387	-0.690467335434358	2.45043148989885e-86	6.99230625642636e-82	ZNF80	14843	distal
chr22:50267359-50268216:MAPK11	0.019	0.049	0.87012260709463	2.1716962607023	0.762121759412574	2.5253955303408e-86	7.20621614582747e-82	MAPK11	2177	distal
chr6:131524232-131525377:ARG1	0.052	0.02	2.2162950128751	0.905943098040704	-0.75489469477907	2.61969578916387e-86	7.47530193437909e-82	ARG1	-47767	distal
chr1:3889853-3891528:C1orf174	0.064	0.028	2.04118605470298	0.947390131740864	-0.643092144435179	4.8173207524852e-86	1.37462247672165e-81	C1orf174	8757	distal
chr6:130513528-130514334:TMEM200A	0.049	0.019	2.41411374977298	0.876032247713403	-0.863826499165413	5.10103286549224e-86	1.45557972816821e-81	TMEM200A	76412	distal
chr10:6498481-6499314:PRKCQ	0.053	0.022	2.19734037192682	0.892736883013197	-0.756398463844263	9.63874234808818e-86	2.75041512902696e-81	PRKCQ	12858	distal
chr3:4850251-4851544:BHLHE40	0.055	0.023	1.99682569914574	0.847930196509636	-0.697524914917618	1.07778961809598e-85	3.07547267523687e-81	BHLHE40	-127572	distal
chr5:94793091-94794170:MCTP1	0.043	0.015	2.09499797517767	0.825229669558329	-0.761860455143526	1.6248346099496e-85	4.63646555949117e-81	MCTP1	135531	distal
chr2:85693661-85695096:GNLY	0.053	0.021	2.1278734794984	0.896385206452589	-0.721930113850945	1.68794850187207e-85	4.81656105009196e-81	GNLY	0	promoter
chr2:233408743-233410532:DGKD	0.072	0.034	2.1264100944946	0.994709408789987	-0.648328442037138	2.09313620089175e-85	5.9727641492446e-81	DGKD	20590	distal
chr16:17590891-17592486:XYLT1	0.055	0.022	1.90209580633057	0.756345452652349	-0.724518513544538	2.66298176794879e-85	7.59881847484186e-81	XYLT1	-120011	distal
chr3:63978944-63980130:ATXN7	0.057	0.024	2.07431371105928	0.924836572081753	-0.675528429705035	3.10286188352835e-85	8.85401638464814e-81	ATXN7	11201	distal
chr3:63978944-63980130:RP11-245J9.9	0.057	0.024	2.07431371105928	0.924836572081753	-0.675528429705035	3.10286188352835e-85	8.85401638464814e-81	RP11-245J9.9	0	distal
chr16:79380895-79382225	0.05	0.019	2.18903393884221	0.853205095216646	-0.783096897303246	3.535115574733e-85	1.00874522925006e-80	---	---	intergenic
chr3:187999710-188000897:LPP	0.046	0.017	2.168343543854	0.785071652579854	-0.827746790450947	4.16830452601002e-85	1.18942569649696e-80	LPP	-152387	distal
chr12:538730-539955:B4GALNT3	0.074	0.036	2.19593762899976	1.07089562109398	-0.625984413775396	6.46374707168512e-85	1.84443022690535e-80	B4GALNT3	0	distal
chr12:538730-539955:NINJ2	0.074	0.036	2.19593762899976	1.07089562109398	-0.625984413775396	6.46374707168512e-85	1.84443022690535e-80	NINJ2	70463	distal
chr7:98514158-98515259:NPTX2	0.041	0.014	2.19253724927666	0.754637386552105	-0.863530538922337	1.11728470702593e-84	3.18817191149848e-80	NPTX2	-102038	distal
chr19:45087269-45088128:GEMIN7	0.077	0.038	2.0324885498632	0.986504387863583	-0.610270217889351	1.54123553160227e-84	4.39791558942706e-80	GEMIN7	0	distal
chr19:45087269-45088128:PPP1R37	0.077	0.038	2.0324885498632	0.986504387863583	-0.610270217889351	1.54123553160227e-84	4.39791558942706e-80	PPP1R37	-4834	distal
chr17:42483915-42485129:ATP6V0A1	0.081	0.041	2.07468149134161	1.03176067439864	-0.59770649441986	1.61477369784749e-84	4.60775674680781e-80	ATP6V0A1	25012	distal
chr2:12708860-12709857:TRIB2	0.046	0.017	2.26074524322852	0.849213766261802	-0.818289722344702	1.93096665277734e-84	5.51001334370013e-80	TRIB2	-7032	distal
chr1:58941545-58943102:JUN	0.042	0.015	2.24935385843606	0.780764523347916	-0.867656106903788	2.23762726138861e-84	6.38506939037239e-80	JUN	-157219	distal
chr11:3946660-3947851:STIM1	0.064	0.029	2.08347350192727	0.928797533857114	-0.676854737018009	2.57427528679752e-84	7.34569453087672e-80	STIM1	90479	distal
chr5:67998505-67999473	0.017	0.043	0.671015153743185	2.14982996746454	0.914549135215913	3.73882695361602e-84	1.06687427121433e-79	---	---	intergenic
chr6:158717200-158718446:SYTL3	0.062	0.027	1.94620051584972	0.89641125311717	-0.635583763275109	6.84798310370515e-84	1.95407197864226e-79	SYTL3	55882	distal
chr15:38576572-38577650:RASGRP1	0.04	0.014	2.24024106641018	0.796977129816817	-0.85052910252273	1.06554280332682e-83	3.04052638929307e-79	RASGRP1	-10998	distal
chr4:89283290-89285270:GPRIN3	0.075	0.037	1.9416185342575	0.941947986289671	-0.599105611968816	1.06800640223622e-83	3.04755626878105e-79	GPRIN3	22740	distal
chr3:16788644-16789952:PLCL2	0.043	0.015	2.1248093759917	0.780463074722511	-0.811515667397703	1.3980669304866e-83	3.9893839861435e-79	PLCL2	-95007	distal
chr9:131839116-131840770:RAPGEF1	0.048	0.018	2.09113281374407	0.795946205127343	-0.783391505462439	1.69897150528485e-83	4.84801519033031e-79	RAPGEF1	-99043	distal
chr22:23242659-23243784:BCR	0.074	0.037	2.07723283352666	0.974588504333603	-0.640081573605461	2.35060264633495e-83	6.70744465131677e-79	BCR	62295	distal
chr5:107476595-107477399:EFNA5	0.052	0.02	2.06423578612308	0.925209535087455	-0.670511839960846	3.14920372058489e-83	8.986252816689e-79	EFNA5	-49082	distal
chr1:203651901-203653764:ATP2B4	0.066	0.03	1.96172287070465	0.895273439558315	-0.644030646069842	3.69663974885289e-83	1.05483615233517e-78	ATP2B4	25115	distal
chr11:61567119-61567941:SYT7	0.019	0.048	0.836522113144013	2.01739092358951	0.716325352247007	6.47113769722916e-83	1.84653914190434e-78	SYT7	12879	distal
chr2:98656530-98657388:MGAT4A	0.057	0.025	2.2012809655801	0.935098897221588	-0.726242002733832	1.2032136711359e-82	3.43337021058628e-78	MGAT4A	6085	distal
chr2:9680802-9681923:YWHAQ	0.062	0.027	2.15529345309207	0.989037858571898	-0.66570345089643	1.24575384715803e-82	3.55475860286543e-78	YWHAQ	-49789	distal
chr18:44700464-44701186:SETBP1	0.057	0.024	2.14291309468157	0.955613964242225	-0.68448076824641	1.84733314648052e-82	5.27136513348216e-78	SETBP1	-152	promoter
chr2:174778194-174779170:CHRNA1	0.073	0.037	2.05812995905127	0.948813632682137	-0.650053586543719	2.2229167545691e-82	6.34309295916292e-78	CHRNA1	8765	distal
chr16:85518600-85520052:GSE1	0.042	0.015	2.29884521249362	0.810667553974021	-0.86543939990546	3.74494310613873e-82	1.06861951533669e-77	GSE1	-91357	distal
chr4:158895763-158897275:C4orf45	0.039	0.013	2.16699116163711	0.729463530757469	-0.872788249249362	4.20359406628293e-82	1.19949556681383e-77	C4orf45	0	distal
chr4:158895763-158897275:FNIP2	0.039	0.013	2.16699116163711	0.729463530757469	-0.872788249249362	4.20359406628293e-82	1.19949556681383e-77	FNIP2	126626	distal
chr21:45265963-45267183:POFUT2	0.063	0.029	2.05381573197503	0.958491397723797	-0.640870220614795	4.22738043204728e-82	1.20628300628469e-77	POFUT2	10227	distal
chr5:172066415-172067347:FBXW11	0.074	0.037	2.08833369735922	1.04957495069236	-0.591503896882052	5.65497669358121e-82	1.6136475995134e-77	FBXW11	-59543	distal
chr5:172066415-172067347:STK10	0.074	0.037	2.08833369735922	1.04957495069236	-0.591503896882052	5.65497669358121e-82	1.6136475995134e-77	STK10	0	distal
chr16:4465507-4466875:NMRAL1	0.083	0.043	2.01516830545499	1.00194483945154	-0.590836311565388	5.97952009679283e-82	1.70625605961983e-77	NMRAL1	7747	distal
chr12:12384401-12385800:BORCS5	0.053	0.022	2.05041539339651	0.858477789259476	-0.714884269909354	9.0472900184211e-82	2.58164420675646e-77	BORCS5	26984	distal
chr20:13230815-13231754:C20orf82	0.042	0.015	2.49034897106834	0.818090724306049	-0.940947093703715	1.20914963424762e-81	3.45030848132559e-77	C20orf82	9045	distal
chr14:65927009-65928502	0.047	0.018	2.2546592011188	0.884444817989328	-0.788366935818092	1.39973463081934e-81	3.99414276904298e-77	---	---	intergenic
chr10:30502133-30503119:MAP3K8	0.049	0.02	2.03423833393533	0.826808693170962	-0.732008850974951	1.48009446285998e-81	4.22344954977096e-77	MAP3K8	63312	distal
chr19:31339346-31341014:TSHZ3	0.062	0.028	2.05235329728354	0.935999690430172	-0.656843235904733	1.63537341138181e-81	4.66653802937799e-77	TSHZ3	8241	distal
chr15:92813269-92814208:RP11-437B10.1	0.049	0.02	2.3968340682443	0.936894946246931	-0.810445038971642	1.67328938205274e-81	4.77473125168749e-77	RP11-437B10.1	-69205	distal
chr14:74573791-74575187:LTBP2	0.046	0.017	2.15458753611908	0.851547252702907	-0.768720015943295	2.08899118425687e-81	5.96093634427698e-77	LTBP2	36885	distal
chr2:27920411-27920999:BRE	0.037	0.012	2.05867757953916	0.718256114412652	-0.831962944745243	2.21061517080623e-81	6.30799038989559e-77	BRE	0	distal
chr2:27920411-27920999:RBKS	0.037	0.012	2.05867757953916	0.718256114412652	-0.831962944745243	2.21061517080623e-81	6.30799038989559e-77	RBKS	-29314	distal
chr1:92315600-92316539:GLMN	0.073	0.035	2.09014133608665	1.02615739302528	-0.608926577412418	2.73488046452353e-81	7.80398140551788e-77	GLMN	-16625	distal
chr1:92315600-92316539:RPAP2	0.073	0.035	2.09014133608665	1.02615739302528	-0.608926577412418	2.73488046452353e-81	7.80398140551788e-77	RPAP2	0	distal
chr6:159053639-159054424:TAGAP	0.041	0.015	2.17067723620208	0.789749892577788	-0.825033030527108	5.5263118494765e-81	1.57693308624812e-76	TAGAP	-8488	distal
chr22:39094490-39095352:APOBEC3H	0.05	0.02	2.19589940134403	0.871473460460174	-0.772047407278281	7.03147195957777e-81	2.00643052366552e-76	APOBEC3H	-1872	distal
chr8:66609282-66610720:MYBL1	0.039	0.013	2.1306861490747	0.786333695304724	-0.809477278047545	7.05069242878114e-81	2.0119150845527e-76	MYBL1	2187	distal
chr17:61139036-61139737:BCAS3	0.052	0.022	2.19938349643301	0.893076664750447	-0.757061094836123	7.5020466082547e-81	2.14070899966548e-76	BCAS3	0	distal
chr10:62383474-62384625:ZNF365	0.044	0.016	2.16813371362824	0.820184172950899	-0.799548791788234	9.82837432164578e-81	2.80452661268162e-76	ZNF365	9283	distal
chr17:83192358-83194373:METRNL	0.039	0.074	0.939158121514007	1.97546960529049	0.61768693310806	1.34026793167149e-80	3.8244545430246e-76	METRNL	108286	distal
chr6:135879800-135881196:PDE7B	0.069	0.034	2.04681386189545	0.943751875350567	-0.6484572974021	1.65771082235207e-80	4.73027783158164e-76	PDE7B	28105	distal
chr1:100440009-100442119:CDC14A	0.076	0.039	2.04611598821817	0.99270893132348	-0.612239881292131	1.66063875771872e-80	4.73863269515036e-76	CDC14A	87061	distal
chr22:46373054-46374808:CELSR1	0.059	0.027	2.13633542693017	0.940438854658091	-0.692696889085595	2.08731120664198e-80	5.95614252815288e-76	CELSR1	0	distal
chr22:46373054-46374808:TRMU	0.059	0.027	2.13633542693017	0.940438854658091	-0.692696889085595	2.08731120664198e-80	5.95614252815288e-76	TRMU	36910	distal
chr5:40378198-40379137	0.038	0.013	2.08837981214526	0.750555381813409	-0.819037483032451	2.18098883428114e-80	6.22345163862123e-76	---	---	intergenic
chr10:7029996-7030949	0.037	0.012	2.17856288607516	0.779395885119561	-0.836987110359399	2.59919341146908e-80	7.41679839962701e-76	---	---	intergenic
chr17:35536522-35538263:SLFN12L	0.065	0.03	2.08531154446243	0.972578732570486	-0.645333290827975	3.61447704292121e-80	1.03139102419757e-75	SLFN12L	0	promoter
chr7:129535073-129536755:SMKR1	0.039	0.013	2.23155088028271	0.798712120513668	-0.845262401567628	3.88408419829079e-80	1.10832342598228e-75	SMKR1	32595	distal
chr5:50593558-50594231:PARP8	0.042	0.015	2.11749035462733	0.771581778542155	-0.815347032737665	5.04238796978931e-80	1.43884540717938e-75	PARP8	-71668	distal
chr15:61857184-61858053:VPS13C	0.051	0.021	2.00623875839406	0.855535352743791	-0.696124105675882	5.11781302357164e-80	1.46036794627617e-75	VPS13C	0	distal
chr6:130183318-130184457:SAMD3	0.053	0.022	2.08401528041371	0.873385426149577	-0.719162166425683	6.202992831749e-80	1.77002400453958e-75	SAMD3	30833	distal
chr6:137717245-137718101:TNFAIP3	0.051	0.022	2.11276334451118	0.846426989729348	-0.753459679018771	6.87699486444153e-80	1.96235048456839e-75	TNFAIP3	-149087	distal
chr6:32529596-32530881:HLA-DRB5	0.06	0.027	1.86153600871133	0.852336227109288	-0.627443768051975	7.66478552460207e-80	2.1871465494452e-75	HLA-DRB5	0	promoter
chr6:40436522-40437300:LRFN2	0.044	0.016	2.27567330027075	0.899401082640181	-0.786246895743599	8.44822986793914e-80	2.41070239281643e-75	LRFN2	150165	distal
chr1:221829237-221830193:DUSP10	0.055	0.023	2.01128633754649	0.935916086898086	-0.637363477998796	9.25024086043408e-80	2.63955622952487e-75	DUSP10	-87062	distal
chr12:51318116-51319599:BIN2	0.066	0.032	2.09553918337485	0.941445493229288	-0.67305951740899	1.15752471234839e-79	3.30299676668612e-75	BIN2	4599	distal
chr6:168877645-168878487	0.044	0.016	2.3030691005925	0.89695488837288	-0.800121780970521	1.82010434525955e-79	5.19366774919812e-75	---	---	intergenic
chr17:39096342-39097393:PLXDC1	0.047	0.019	2.25877525965741	0.903526357092902	-0.775655314276524	2.77390939295911e-79	7.91535045280883e-75	PLXDC1	54256	distal
chr1:203606932-203607792:ATP2B4	0.064	0.03	2.10684110167343	0.951366519513528	-0.670963676578031	3.49830152658739e-79	9.98240340611711e-75	ATP2B4	-18769	distal
chr1:184866839-184867947:FAM129A	0.063	0.029	1.93832358217227	0.928725469874548	-0.60734547281248	3.75623253219666e-79	1.07184095306232e-74	FAM129A	106603	distal
chr12:68539041-68539710:RAP1B	0.05	0.02	2.23290497075885	0.912592876496687	-0.757301293437471	4.15684842458295e-79	1.18615669795474e-74	RAP1B	-71129	distal
chr2:7748477-7749499	0.045	0.017	2.21342009294432	0.856257994322606	-0.791712358636584	4.48125618369804e-79	1.27872645201823e-74	---	---	intergenic
chr10:29635586-29636732:SVIL	0.044	0.016	2.10444513754848	0.853319309233418	-0.744223970921068	4.5530346594974e-79	1.29920844008758e-74	SVIL	-615	promoter
chr21:15513965-15514855	0.055	0.024	2.23012336088405	0.930803789585262	-0.742387700126441	4.93999397542752e-79	1.40962728088824e-74	---	---	intergenic
chrX:72168810-72169689:PIN4	0.066	0.031	2.08311121801364	1.01733670147826	-0.611935037604266	7.74896366152825e-79	2.21116678081709e-74	PIN4	-11987	distal
chr12:68450888-68452210:MDM1	0.044	0.016	1.93211469240239	0.772468946396835	-0.726181185226229	9.07258066012763e-79	2.58886089136742e-74	MDM1	-118508	distal
chr10:110849867-110851359:PDCD4	0.05	0.02	2.12771703432845	0.905767165159923	-0.714738126955156	1.14605021728021e-78	3.27025429500908e-74	PDCD4	-20436	distal
chr6:144582863-144583790:UTRN	0.049	0.02	2.11788839115293	0.863508716064738	-0.742547718921673	1.50844883976886e-78	4.30435876428045e-74	UTRN	0	promoter
chr2:232502470-232503617:ECEL1	0.017	0.043	0.819707472873796	2.12149821116821	0.778532090450679	1.66016832359107e-78	4.73729031136711e-74	ECEL1	-14643	distal
chr1:89285628-89287529:GBP5	0.057	0.025	1.95550748287741	0.906009095011911	-0.63285086981486	1.75215492441402e-78	4.99977407681541e-74	GBP5	-14766	distal
chr11:35247202-35248626:CD44	0.085	0.046	1.9592328191473	0.966402739702978	-0.589664374894731	2.104179494715e-78	6.00427618816925e-74	CD44	66820	distal
chr10:22596870-22597706:PIP4K2A	0.054	0.024	2.0150033980282	0.869286213611088	-0.689672145510984	2.48748922984599e-78	7.09805051736554e-74	PIP4K2A	-5158	distal
chr3:39234484-39235203:XIRP1	0.046	0.018	2.2393078282949	0.894269810441891	-0.774043736761415	2.51025312763461e-78	7.16300729970535e-74	XIRP1	-41889	distal
chr12:104687421-104688588:CHST11	0.059	0.026	1.96041388962154	0.916837908590768	-0.627070545135745	3.36646882325661e-78	9.60621878716273e-74	CHST11	0	distal
chr10:73774484-73775140:FUT11	0.037	0.013	2.25613842483268	0.757173025205903	-0.889905775156609	4.40220160442673e-78	1.25616822782317e-73	FUT11	2194	distal
chr7:127856649-127857322:LRRC4	0.043	0.016	2.24970377856836	0.860360955065	-0.804725651369951	4.4827416305774e-78	1.27915032428526e-73	LRRC4	173748	distal
chr7:127856649-127857322:SND1	0.043	0.016	2.24970377856836	0.860360955065	-0.804725651369951	4.4827416305774e-78	1.27915032428526e-73	SND1	0	distal
chr1:203755925-203757060:LAX1	0.036	0.012	2.31363108404505	0.80511285508527	-0.876323955395384	5.39349786479695e-78	1.53903461571981e-73	LAX1	-8116	distal
chr4:101526997-101527738:BANK1	0.065	0.031	2.00263791838274	0.950492077429096	-0.622392375516958	9.78741919968839e-78	2.79284006863108e-73	BANK1	107037	distal
chr1:7948931-7949658:TNFRSF9	0.038	0.013	2.2094566363786	0.797630772616971	-0.836232342059866	1.81851295944254e-77	5.1891267297693e-73	TNFRSF9	-5767	distal
chr4:88613134-88614058:HERC3	0.067	0.033	2.16852019571593	0.986857727124729	-0.673320641846889	2.10511088045163e-77	6.00693389736871e-73	HERC3	7341	distal
chr4:88613134-88614058:RP11-2I7.1	0.067	0.033	2.16852019571593	0.986857727124729	-0.673320641846889	2.10511088045163e-77	6.00693389736871e-73	RP11-2I7.1	0	distal
chr7:3119369-3121137:CARD11	0.062	0.029	2.12406096777386	1.06208423943145	-0.599319338440265	2.50895161813905e-77	7.15929344235977e-73	CARD11	-75425	distal
chr13:73715171-73716323:KLF12	0.063	0.03	2.10883851956741	0.942255140447233	-0.678642951685627	3.03001341826934e-77	8.64614328903155e-73	KLF12	0	distal
chr7:148628451-148629347:C7orf33	0.046	0.018	2.25022149284252	0.89477591466066	-0.778510798419248	3.66347483019432e-77	1.04537254279595e-72	C7orf33	37887	distal
chr17:41341035-41342021:KRT33A	0.046	0.019	2.24660276206719	0.841376631983241	-0.818146131324228	4.86576554816255e-77	1.38844619916818e-72	KRT33A	8791	distal
chr12:116916510-116917262:FBXW8	0.056	0.024	1.95881803988001	0.907320225568368	-0.633473894746151	6.35890729157054e-77	1.81451419564965e-72	FBXW8	5546	distal
chr2:239622957-239623688	0.042	0.016	2.20259965015241	0.80315435236264	-0.82872056265898	7.13301072996359e-77	2.03540461179511e-72	---	---	intergenic
chr8:117439269-117440397:MED30	0.049	0.021	2.06018021187654	0.828808685577439	-0.742712454237762	9.89085463549703e-77	2.82235537023908e-72	MED30	-80316	distal
chr6:36203881-36204629:BRPF3	0.041	0.015	2.27135032794539	0.839089354064736	-0.830894689193458	1.02285068961603e-76	2.91870444281935e-72	BRPF3	3585	distal
chr5:172722068-172722752:DUSP1	0.042	0.015	2.18932486532957	0.821369565964571	-0.808227375483056	2.07155571283965e-76	5.91118422658793e-72	DUSP1	48443	distal
chr7:100515973-100516757:AGFG2	0.051	0.021	2.13176667857932	0.918669567075488	-0.706870461391661	3.64435272954795e-76	1.03991605137651e-71	AGFG2	-22468	distal
chr10:6409804-6410881:PRKCQ	0.075	0.039	2.07625342360244	1.03330144875421	-0.59735023931658	3.86698244021048e-76	1.10344343931406e-71	PRKCQ	101291	distal
chr11:82959888-82961156:RAB30	0.066	0.032	2.02104345419577	0.944482274432755	-0.635660852233739	4.23866704759532e-76	1.20950364203132e-71	RAB30	36257	distal
chr1:64876989-64877885:JAK1	0.047	0.02	2.29801912483382	0.900178573817232	-0.795464759184764	4.72121071601145e-76	1.34719747781387e-71	JAK1	88619	distal
chr10:6558167-6559191:PRKCQ	0.04	0.014	2.18662715944181	0.808741605389962	-0.817043910291379	5.00880498013899e-76	1.42926250108266e-71	PRKCQ	21110	distal
chr17:74279868-74280719:DNAI2	0.056	0.025	2.12315192297557	0.918552787229789	-0.702984289770716	5.23110641927285e-76	1.49269621673951e-71	DNAI2	-793	promoter
chr1:16122723-16124236:EPHA2	0.062	0.028	2.15318993867912	1.02915313283735	-0.635934332077035	5.37918552941992e-76	1.53495059081998e-71	EPHA2	31851	distal
chr6:107726011-107727534:SCML4	0.065	0.032	1.94675569135006	0.959613049305753	-0.588558651084683	7.14962786538986e-76	2.040146311389e-71	SCML4	4861	distal
chr2:197869404-197870301:PLCL1	0.043	0.017	2.40735095488982	0.859592944426643	-0.873663694540945	7.34026239298683e-76	2.09454387383879e-71	PLCL1	64703	distal
chr10:32459087-32459885:CCDC7	0.042	0.017	2.37476240288755	0.874142501146515	-0.848555281051237	7.90894533646384e-76	2.25681755175996e-71	CCDC7	7445	distal
chr18:22465891-22467152:CTAGE1	0.044	0.017	2.23206180595341	0.949915371021683	-0.729043276262218	7.9511184292807e-76	2.26885164379525e-71	CTAGE1	-47977	distal
chr12:68591485-68592580:RAP1B	0.044	0.017	2.25905519303567	0.862491607397377	-0.807219860099505	8.65477334375391e-76	2.46963957364018e-71	RAP1B	-18259	distal
chr7:38242686-38243776:TRGC2	0.037	0.013	2.12032981460656	0.809275375155593	-0.786286522443518	8.75119564002705e-76	2.49715367588172e-71	TRGC2	5796	distal
chrX:149829632-149830826:MAGEA9	0.049	0.021	2.24659594434516	0.946620483036966	-0.737956204130664	2.66828287762709e-75	7.6139451913089e-71	MAGEA9	47703	distal
chr8:41514628-41515739:GINS4	0.057	0.026	2.17483441447925	0.997817031881082	-0.668256887797728	3.14090381906597e-75	8.96256904770474e-71	GINS4	-13467	distal
chr17:65523064-65524225:AXIN2	0.043	0.017	2.24515151235069	0.831355590404285	-0.825373894201055	3.29233514540879e-75	9.39467833742397e-71	AXIN2	34504	distal
chr1:198556765-198557484:ATP6V1G3	0.061	0.029	2.0681144091587	0.949083760988386	-0.654556190461405	3.44586083242282e-75	9.83276388531852e-71	ATP6V1G3	-15821	distal
chr19:3798032-3798761:MATK	0.038	0.014	2.31289338743483	0.81410198604568	-0.868836212387173	4.62642883802291e-75	1.32015146892984e-70	MATK	3051	distal
chr5:139925750-139926731:NRG2	0.036	0.012	2.25708849238447	0.783109373577941	-0.869187718401597	5.35856760254348e-75	1.52906726538578e-70	NRG2	-21354	distal
chr3:112671998-112673366:CCDC80	0.039	0.014	2.13266661650135	0.783054161115042	-0.813040717741136	6.13404628104379e-75	1.75035010629585e-70	CCDC80	-30699	distal
chr4:121253710-121255067:TNIP3	0.069	0.034	2.01262434851925	0.969966763682901	-0.612849501541445	6.25046886916273e-75	1.78357129181558e-70	TNIP3	-26245	distal
chr17:39818536-39819955:IKZF3	0.062	0.03	2.04620644848709	0.94456073438126	-0.647569424825163	1.1762405731066e-74	3.35640247535968e-70	IKZF3	-40312	distal
chr14:24609485-24610387:GZMH	0.044	0.017	2.14194028660396	0.868475226527127	-0.749794326450277	1.2479452730007e-74	3.56101183650751e-70	GZMH	0	promoter
chr9:38226578-38228128:SHB	0.053	0.023	2.04618640218919	0.938579516989712	-0.652004312880698	1.60818313404369e-74	4.58895057299366e-70	SHB	-157368	distal
chr16:30767586-30768356:CCDC189	0.038	0.014	2.07089981748263	0.698861250533679	-0.854093418297101	1.64650338407818e-74	4.69829740646709e-70	CCDC189	-4877	distal
chr16:30767586-30768356:RNF40	0.038	0.014	2.07089981748263	0.698861250533679	-0.854093418297101	1.64650338407818e-74	4.69829740646709e-70	RNF40	0	distal
chr4:36268785-36269675:DTHD1	0.058	0.026	2.06839305602215	0.990256429776997	-0.624528978203548	3.28486333001269e-74	9.37335751219121e-70	DTHD1	-11947	distal
chr16:68062556-68063456:DUS2	0.051	0.022	2.14024442724168	0.984711826040442	-0.661947310798598	3.64514950777137e-74	1.04014341204256e-69	DUS2	0	distal
chr16:68062556-68063456:NFATC3	0.051	0.022	2.14024442724168	0.984711826040442	-0.661947310798598	3.64514950777137e-74	1.04014341204256e-69	NFATC3	-21888	distal
chr6:25055946-25057479:RIPOR2	0.07	0.035	1.93381433337252	0.946302558112055	-0.592041574368185	3.72157984758316e-74	1.06195280950785e-69	RIPOR2	-13929	distal
chr12:92398331-92400669:CLLU1OS	0.066	0.033	2.07448585342003	0.988980848812557	-0.62831578354292	4.62508329291756e-74	1.31976751763403e-69	CLLU1OS	27477	distal
chr15:39629103-39629980:FSIP1	0.048	0.02	2.18119260395761	0.923078322504416	-0.726150200395642	4.66637714837533e-74	1.3315507192889e-69	FSIP1	0	distal
chr15:39629103-39629980:THBS1	0.048	0.02	2.18119260395761	0.923078322504416	-0.726150200395642	4.66637714837533e-74	1.3315507192889e-69	THBS1	48011	distal
chr20:62501534-62502624:GATA5	0.013	0.036	0.636989840456585	1.82859737177709	0.789041467107007	4.94912012435103e-74	1.41223142748357e-69	GATA5	-25565	distal
chr6:52397647-52398500:EFHC1	0.046	0.019	2.30840037351529	0.891093415857636	-0.806913205049289	5.50212028785869e-74	1.57003002414048e-69	EFHC1	-21607	distal
chr6:52397647-52398500:PAQR8	0.046	0.019	2.30840037351529	0.891093415857636	-0.806913205049289	5.50212028785869e-74	1.57003002414048e-69	PAQR8	0	distal
chr1:8427195-8428399:RERE	0.064	0.031	1.85962706410178	0.905781883026929	-0.585443999321306	7.16035871140967e-74	2.04320835830075e-69	RERE	-3530	distal
chr15:60649421-60650578:RORA	0.059	0.027	1.98805634969432	0.94830345601592	-0.616988954759853	1.656951755682e-73	4.7281118348386e-69	RORA	-21959	distal
chr19:50607867-50608560:SYT3	0.017	0.043	0.885936036598148	2.18813387543928	0.757431465542148	1.81659815361525e-73	5.18366283134111e-69	SYT3	29485	distal
chr13:94323662-94324442:GPC6	0.042	0.017	2.2747159480259	0.832231853763972	-0.837767695244366	1.8299124404244e-73	5.22165514875101e-69	GPC6	37315	distal
chr12:682191-683023:NINJ2	0.042	0.017	1.92483493275626	0.701536494564057	-0.781517111869025	2.23734169577866e-73	6.38425452890442e-69	NINJ2	-18413	distal
chr16:25060659-25061583:ARHGAP17	0.046	0.019	2.30114838988016	0.869446200100534	-0.820357037423009	3.07028604447975e-73	8.76106122792298e-69	ARHGAP17	-45329	distal
chr19:35929758-35930471:LRFN3	0.039	0.014	2.0487141524878	0.779610220117127	-0.776639600668599	3.57149989067447e-73	1.01912749380396e-68	LRFN3	-5079	distal
chr18:75216115-75217085:TSHZ1	0.047	0.02	2.15076525095048	0.873054184236504	-0.750309634906126	6.05198057006767e-73	1.72693265566881e-68	TSHZ1	4587	distal
chr6:90424960-90425813:MAP3K7	0.037	0.013	2.11931057006588	0.786680002220128	-0.803945931807521	7.12673667591026e-73	2.03361431047099e-68	MAP3K7	127651	distal
chr1:12449111-12450686:VPS13D	0.055	0.025	2.2326082508168	1.01130937345258	-0.684563672932578	7.74128765563065e-73	2.20897643253421e-68	VPS13D	-14254	distal
chr20:20215866-20216799:CFAP61	0.052	0.022	2.15297213834577	1.03448119393731	-0.632051476828983	7.8742877534523e-73	2.24692801044761e-68	CFAP61	-5141	distal
chr3:185582614-185583469:SENP2	0.045	0.018	2.12044463365718	0.872215094588324	-0.737005421608261	8.40554092175021e-73	2.39852110202142e-68	SENP2	-2705	distal
chr14:75229810-75230870:FOS	0.063	0.03	1.93098655583229	0.94425048075669	-0.592172255010963	9.34077522893479e-73	2.66539021157654e-68	FOS	-47904	distal
chr1:185338616-185339695:IVNS1ABP	0.047	0.019	2.03022392576384	0.873164319038153	-0.693946946853439	9.86834155950494e-73	2.81593126400473e-68	IVNS1ABP	-21288	distal
chr14:106308720-106309443:IGHV2-26	0.021	0.048	0.888107847185967	2.05361727363139	0.693578080071322	1.01032480027601e-72	2.88296181758759e-68	IGHV2-26	-6859	distal
chr2:9655343-9657231:YWHAQ	0.046	0.019	2.1267741906368	0.857019549920691	-0.751686031041689	1.46312311930952e-72	4.17502182094973e-68	YWHAQ	-24330	distal
chr18:2889603-2890343:EMILIN2	0.035	0.012	2.24730758785202	0.725644895558667	-0.912108428208095	1.46758269989035e-72	4.18774723413712e-68	EMILIN2	42574	distal
chr22:22820377-22821468:IGLV2-8	0.037	0.014	2.3091404066459	0.77093209934076	-0.901947608741978	1.61387368169196e-72	4.60518855070802e-68	IGLV2-8	-1190	distal
chr16:23182261-23183195:SCNN1G	0.025	0.053	0.865488669517639	1.86903650848258	0.621012728879194	1.84370085597292e-72	5.26100039251874e-68	SCNN1G	0	promoter
chr2:203719697-203721583:CD28	0.055	0.026	2.23452582333615	0.993473556412626	-0.698269762780339	2.03981000463635e-72	5.82059784822983e-68	CD28	13150	distal
chr8:143218589-143220740:GPIHBP1	0.023	0.05	0.935213237718466	2.25630920698733	0.750745155914099	2.06166547871189e-72	5.88296244350439e-68	GPIHBP1	5397	distal
chrY:7279747-7280861	0.035	0.012	1.89210926015092	0.61950087095533	-0.836572812469307	2.63876507085921e-72	7.52971612969674e-68	---	---	intergenic
chr18:23570697-23571724:NPC1	0.04	0.015	2.23430545700585	0.865453500299294	-0.793929538570395	2.81304080716059e-72	8.02701194323274e-68	NPC1	15174	distal
chr10:5297229-5298004:UCN3	0.039	0.014	2.12335947853823	0.804570950325811	-0.791442757013075	2.9366503392987e-72	8.37973174318885e-68	UCN3	-67005	distal
chr10:3945642-3946525:KLF6	0.039	0.014	2.14903571069485	0.808254110336627	-0.800312686965632	3.82299583354857e-72	1.09089186110308e-67	KLF6	-160362	distal
chr12:10305312-10306346:KLRD1	0.046	0.019	2.10526453247445	0.895824246824705	-0.711890949751862	3.89754345783328e-72	1.11216402569273e-67	KLRD1	867	distal
chr5:96537162-96537973:PCSK1	0.051	0.022	2.06256481210897	0.9589016364669	-0.644695419255301	6.01243515608962e-72	1.71564837179017e-67	PCSK1	-103883	distal
chr11:13868733-13869811:SPON1	0.077	0.042	2.18109365137288	1.09271013905045	-0.60415034746365	6.60933578473529e-72	1.88597396617421e-67	SPON1	-92878	distal
chr2:151637045-151639003:NEB	0.066	0.033	2.05815991068533	1.00316757086068	-0.610380735077244	7.18357673726301e-72	2.049833621978e-67	NEB	94153	distal
chr5:40441477-40442700	0.045	0.018	2.20915743619687	0.942782508040755	-0.724070165555582	1.39204963308872e-71	3.97221362801867e-67	---	---	intergenic
chr1:77430989-77432013:AK5	0.039	0.015	2.18898300789636	0.834863029423553	-0.797424038952244	1.42095658873618e-71	4.05469962595868e-67	AK5	-100094	distal
chr8:144455977-144457435:CYHR1	0.017	0.041	0.728681062290759	1.9898126461932	0.790383362533307	1.58132333191601e-71	4.51230612762233e-67	CYHR1	5426	distal
chr7:30726469-30727930:INMT	0.074	0.039	2.04813164257963	1.00573017408674	-0.603797674416231	1.68689507829524e-71	4.81355510591548e-67	INMT	-24205	distal
chr7:130938232-130939182:MKLN1	0.055	0.025	1.95311920993032	0.923297857648124	-0.618657388043212	2.05084915864526e-71	5.85209807419424e-67	MKLN1	-170914	distal
chr22:28748914-28749585:HSCB	0.034	0.011	2.24033314778466	0.784381040347699	-0.860718424096566	2.99038927384134e-71	8.53307579290626e-67	HSCB	6860	distal
chr19:18879262-18880448:CERS1	0.026	0.055	0.927171584018492	2.07900978500295	0.675981425802746	3.37577442262861e-71	9.63277231497072e-67	CERS1	15648	distal
chr19:18879262-18880448:GDF1	0.026	0.055	0.927171584018492	2.07900978500295	0.675981425802746	3.37577442262861e-71	9.63277231497072e-67	GDF1	15648	distal
chr19:38655368-38657239:ACTN4	0.058	0.028	2.08428927773648	0.968729883223766	-0.647672901115226	4.12822362410887e-71	1.17798861113947e-66	ACTN4	7623	distal
chr8:100415542-100416514:RNF19A	0.042	0.017	2.17205825035734	0.824620421484139	-0.797822895137787	4.60749619779933e-71	1.31474904004204e-66	RNF19A	-105216	distal
chr9:99076357-99077262:TGFBR1	0.046	0.019	2.14467310111009	0.907495467138234	-0.721230423379392	5.44417751294068e-71	1.55349605331762e-66	TGFBR1	-27827	distal
chr16:78894758-78897236:WWOX	0.046	0.019	2.04016318445659	0.840558224852368	-0.724005375002928	7.48182812439537e-71	2.13493965529622e-66	WWOX	0	distal
chr14:65850111-65850996	0.041	0.016	2.26673322609719	0.880468633116484	-0.79675640168911	8.03703635670888e-71	2.29336832438688e-66	---	---	intergenic
chr3:50472738-50474006:CACNA2D2	0.043	0.017	2.17036636914968	0.880792513089332	-0.753308867422731	9.54141009708274e-71	2.72264137120256e-66	CACNA2D2	29417	distal
chr11:134582326-134584451:B3GAT1	0.051	0.022	2.11765003146008	1.01359227648017	-0.63068740101517	9.6861744036924e-71	2.76394986609363e-66	B3GAT1	-170409	distal
chr5:157193503-157194415:ITK	0.048	0.021	2.12765409244271	0.923284251639128	-0.701508963031608	1.04342356818314e-70	2.97740915181059e-66	ITK	12678	distal
chr3:4845735-4846389:BHLHE40	0.035	0.012	2.28314806759586	0.781021070158741	-0.882375231704528	1.34154041243553e-70	3.82808556688477e-66	BHLHE40	-132727	distal
chr3:4845735-4846389:ITPR1	0.035	0.012	2.28314806759586	0.781021070158741	-0.882375231704528	1.34154041243553e-70	3.82808556688477e-66	ITPR1	0	distal
chr17:35895719-35896813:CCL5	0.046	0.019	1.97342169732445	0.878369957937472	-0.662642844266415	1.38651823086845e-70	3.95642977178312e-66	CCL5	-14927	distal
chr7:138875648-138876367:ATP6V0A4	0.051	0.023	2.04017234540054	0.90366045417013	-0.675376935713461	1.99642707664532e-70	5.69680466320743e-66	ATP6V0A4	-77453	distal
chr7:138875648-138876367:KIAA1549	0.051	0.023	2.04017234540054	0.90366045417013	-0.675376935713461	1.99642707664532e-70	5.69680466320743e-66	KIAA1549	0	distal
chr20:50440401-50441884:PTPN1	0.017	0.04	0.706715230079175	1.96368460436335	0.796169563062978	2.00384029937076e-70	5.71795829425446e-66	PTPN1	-68437	distal
chr19:4769348-4770006:FEM1A	0.029	0.059	1.00347031428169	2.0347452486981	0.599074281413476	2.13513817640833e-70	6.09261678638116e-66	FEM1A	-21675	distal
chr1:184843647-184844384:EDEM3	0.043	0.017	2.04003168395743	0.796515060613938	-0.758885330022381	2.27638598948573e-70	6.49566742099754e-66	EDEM3	-88735	distal
chr1:184843647-184844384:FAM129A	0.043	0.017	2.04003168395743	0.796515060613938	-0.758885330022381	2.27638598948573e-70	6.49566742099754e-66	FAM129A	0	distal
chr6:53647183-53648099:KLHL31	0.044	0.017	1.91689465893107	0.853889968619792	-0.653877665311491	2.55560928054436e-70	7.29243108203333e-66	KLHL31	7173	distal
chr8:131856469-131857501:EFR3A	0.013	0.034	0.661632257097489	2.15214273370728	0.923731735190093	2.88282604990478e-70	8.22614413340329e-66	EFR3A	-46587	distal
chr3:50627152-50628304:MAPKAPK3	0.023	0.049	0.764801721951791	1.98290833206571	0.757213539098217	2.90249678272612e-70	8.28227456950898e-66	MAPKAPK3	9983	distal
chr10:110156535-110157724:MXI1	0.075	0.04	2.05533833894729	1.01809025318929	-0.598341452378491	4.01231092148155e-70	1.14491292144476e-65	MXI1	-49881	distal
chr1:228635083-228635913:RHOU	0.015	0.039	0.895517104158531	2.28298976076798	0.792418775638082	4.11148329142877e-70	1.1732117572092e-65	RHOU	-99164	distal
chr19:54803192-54804799:KIR2DL4	0.056	0.025	2.14511252405724	1.02238912191179	-0.637051025318724	5.50748982258901e-70	1.57156222087578e-65	KIR2DL4	0	promoter
chr1:54480196-54482210:ACOT11	0.053	0.024	2.07815791224871	0.986093541593395	-0.632133672183961	6.93873732022445e-70	1.97996869432605e-65	ACOT11	-66018	distal
chr11:122842994-122844308:CRTAM	0.058	0.028	1.95195050876832	0.924228025565499	-0.617388761940017	7.8711872157591e-70	2.24604327201686e-65	CRTAM	4495	distal
chr7:116671705-116672863:MET	0.014	0.036	0.662565004843916	1.91659341260409	0.810873531667418	9.27696568998055e-70	2.64718215963595e-65	MET	0	promoter
chrX:131987112-131987885:STK26	0.049	0.021	2.04110366738972	0.939736816823848	-0.648734075800169	9.97106710199215e-70	2.84524399755346e-65	STK26	-35380	distal
chr1:25990135-25991536:PAFAH2	0.068	0.035	2.10456750600362	1.06801429406853	-0.586146144569189	1.10883809721444e-69	3.16406951040142e-65	PAFAH2	6508	distal
chr3:10242185-10242998:IRAK2	0.068	0.035	2.17302715352261	1.03716215461136	-0.639299046403283	1.13784975453619e-69	3.246854274569e-65	IRAK2	0	distal
chr3:10242185-10242998:TATDN2	0.068	0.035	2.17302715352261	1.03716215461136	-0.639299046403283	1.13784975453619e-69	3.246854274569e-65	TATDN2	-5025	distal
chr2:134232197-134234238:MGAT5	0.06	0.029	2.00408130196762	0.978147564648398	-0.602773806846229	1.58078327226172e-69	4.5107650673988e-65	MGAT5	-20021	distal
chr12:47276451-47277424:AMIGO2	0.061	0.03	2.06539546630995	0.973217109408735	-0.635523505993975	1.66942782342872e-69	4.76371229415385e-65	AMIGO2	-196501	distal
chr20:59177472-59178488:ZNF831	0.06	0.029	1.98818593068043	0.946656769129949	-0.618271384984996	1.71115688214117e-69	4.88278616318983e-65	ZNF831	-12532	distal
chr7:151744942-151745799:PRKAG2	0.015	0.037	0.746090263864543	2.20129465266345	0.874527330335907	2.02082947732006e-69	5.76643691353278e-65	PRKAG2	-8629	distal
chr11:12087141-12088452:MICAL2	0.059	0.028	1.98496728661865	0.976327837720375	-0.594892836255906	3.05428731418351e-69	8.71540885102264e-65	MICAL2	-22139	distal
chr1:32627425-32628295:ZBTB8OS	0.05	0.022	2.0153849026577	0.913358118887429	-0.656235243624225	3.5578166268422e-69	1.01522297446942e-64	ZBTB8OS	22230	distal
chr8:144767264-144768688:ZNF251	0.021	0.046	0.776984232516632	2.00319341377832	0.757066511204815	3.83498711082282e-69	1.09431357207329e-64	ZNF251	-11660	distal
chr4:47531504-47532243:ATP10D	0.034	0.012	2.24085246582485	0.738778046988302	-0.898299559926863	4.00524957464703e-69	1.14289796612553e-64	ATP10D	46206	distal
chr16:79370438-79371264	0.038	0.014	2.12966202419574	0.828187031613149	-0.775593195246642	4.99973756262208e-69	1.42667511349421e-64	---	---	intergenic
chrX:40278467-40279343:BCOR	0.049	0.021	2.12990839192866	0.978488395878153	-0.661721828376372	5.40681899671687e-69	1.54283580071316e-64	BCOR	-101139	distal
chr1:181395973-181396897:CACNA1E	0.037	0.015	2.48268744180115	0.798309366571144	-0.953559770471929	5.43349716388379e-69	1.55044841571424e-64	CACNA1E	-86683	distal
chr17:14427935-14429319:HS3ST3B1	0.072	0.038	2.04046028385235	1.01254475245068	-0.595268879950791	5.54412683550284e-69	1.58201659251073e-64	HS3ST3B1	126853	distal
chr2:110674944-110676106:BUB1	0.055	0.025	1.86172464843068	0.879723897039655	-0.606364097006875	5.62127195862937e-69	1.60402995339489e-64	BUB1	1957	distal
chr1:198519523-198521233:ATP6V1G3	0.05	0.022	1.92234423814117	0.878966891835054	-0.637186484605376	6.07185561570496e-69	1.73260399994141e-64	ATP6V1G3	19441	distal
chr3:43023712-43024905:FAM198A	0.048	0.021	2.22946567635775	0.943789893260997	-0.732423202334842	7.2102913877854e-69	2.05745664750456e-64	FAM198A	44165	distal
chr3:43023712-43024905:RP11-136C24.3	0.048	0.021	2.22946567635775	0.943789893260997	-0.732423202334842	7.2102913877854e-69	2.05745664750456e-64	RP11-136C24.3	0	distal
chr2:102417761-102418999:IL18RAP	0.04	0.015	1.90429541710341	0.788569043529631	-0.699382396569497	8.71694755445643e-69	2.48738098466414e-64	IL18RAP	0	promoter
chr3:106176583-106177280	0.041	0.016	2.15947376825602	0.906843469696217	-0.728497868236736	1.19453291895263e-68	3.40859968423132e-64	---	---	intergenic
chr15:64622369-64623613:OAZ2	0.055	0.026	2.02699460860589	0.966568329117449	-0.622205791471866	1.21600920818212e-68	3.46988227554769e-64	OAZ2	79588	distal
chr15:64622369-64623613:ZNF609	0.055	0.026	2.02699460860589	0.966568329117449	-0.622205791471866	1.21600920818212e-68	3.46988227554769e-64	ZNF609	0	distal
chr19:246731-247568:PLPP2	0.016	0.039	0.781581865892069	1.99108253206986	0.747508940253533	1.30475223594993e-68	3.72311050528312e-64	PLPP2	43617	distal
chr17:64968581-64970481:LRRC37A3	0.053	0.024	1.8450913466515	0.883343707524137	-0.595178659777181	1.76966500592085e-68	5.04973909439516e-64	LRRC37A3	-49114	distal
chr19:7185983-7186868:INSR	0.037	0.013	2.08301566930166	0.849304908067894	-0.737359110144953	2.14555229635887e-68	6.12233347766003e-64	INSR	107063	distal
chr5:62578470-62579036:IPO11	0.041	0.016	2.10260993635793	0.825219658162381	-0.765412233771866	2.48023839206839e-68	7.07736025176716e-64	IPO11	0	promoter
chr5:62578470-62579036:LRRC70	0.041	0.016	2.10260993635793	0.825219658162381	-0.765412233771866	2.48023839206839e-68	7.07736025176716e-64	LRRC70	0	promoter
chr10:3948693-3949420:KLF6	0.055	0.026	2.0669835392985	0.957097569308449	-0.648104741588211	2.9937915870456e-68	8.54278429363462e-64	KLF6	-163413	distal
chr3:128496567-128498266:GATA2	0.032	0.062	0.984612758240675	1.98880890544367	0.590713125636905	3.44343709291728e-68	9.82584774463947e-64	GATA2	-3383	distal
chr11:63866094-63866851:MARK2	0.057	0.027	2.05063552883147	0.979478890068835	-0.623989143892606	3.70504670789126e-68	1.05723507809677e-63	MARK2	-21696	distal
chrX:49272422-49273964:PPP1R3F	0.043	0.018	2.29323026821988	0.88332160181086	-0.806224011084813	5.43977730859917e-68	1.55224045500877e-63	PPP1R3F	2553	distal
chr1:19687811-19689053:HTR6	0.037	0.014	2.11364426444541	0.773040358387802	-0.812378749541756	5.57914254622411e-68	1.59200832556505e-63	HTR6	22525	distal
chr1:19687811-19689053:TMCO4	0.037	0.014	2.11364426444541	0.773040358387802	-0.812378749541756	5.57914254622411e-68	1.59200832556505e-63	TMCO4	0	distal
chr17:1890642-1891519:RPA1	0.048	0.021	2.14028583723962	0.957302975971261	-0.682028791332405	5.74568790627095e-68	1.63953204405442e-63	RPA1	60659	distal
chr8:19510798-19511874:CSGALNACT1	0.066	0.034	2.09865139163573	1.0390945580238	-0.603711777806675	7.06591598505883e-68	2.01625912633654e-63	CSGALNACT1	89991	distal
chr8:128540280-128541470	0.05	0.022	2.08193357115014	0.938153895056764	-0.669152636455491	7.88098186811294e-68	2.24883817606603e-63	---	---	intergenic
chr15:38685752-38686643:RP11-275I4.2	0.045	0.02	2.28991841731466	0.913648168496836	-0.781726199537615	7.98876318780681e-68	2.27959357564067e-63	RP11-275I4.2	-9955	distal
chr6:148198-149068:DUSP22	0.016	0.039	0.792953034315506	1.97321273420163	0.72968499428761	8.30916627699277e-68	2.37102059713989e-63	DUSP22	-143029	distal
chr15:38610529-38611672:RASGRP1	0.046	0.02	2.02984483984227	0.862440661337849	-0.702049453284189	9.1596124283719e-68	2.61369540643592e-63	RASGRP1	-44955	distal
chr15:90376697-90377420:IQGAP1	0.037	0.014	2.31728593915035	0.850699039560872	-0.841933069657764	1.80479119866728e-67	5.1499716853971e-63	IQGAP1	-10798	distal
chr12:92403551-92404634:CLLU1OS	0.054	0.025	2.05819644285011	0.961750655377987	-0.640539398829336	2.52770749306921e-67	7.21281333147298e-63	CLLU1OS	23512	distal
chr2:8281886-8283434	0.049	0.021	2.09369066354899	0.95689209560704	-0.660764742755375	2.55305137793058e-67	7.28513210692492e-63	---	---	intergenic
chr9:86106629-86107481:GOLM1	0.049	0.021	1.99036869237835	0.951995767110524	-0.615373445570114	5.44448604230284e-67	1.55358409217112e-62	GOLM1	-6481	distal
chr6:137033690-137034366:IL20RA	0.045	0.019	2.0307058854032	0.850642583855517	-0.711627559481396	7.73139947682547e-67	2.20615484071215e-62	IL20RA	9946	distal
chr11:10742728-10744203:CTR9	0.046	0.019	1.84553257966184	0.830277476621399	-0.636636314742381	8.85167018682373e-67	2.52582408781015e-62	CTR9	-6784	distal
chr12:55846934-55848439:MMP19	0.016	0.038	0.747438028070877	2.04485970171144	0.8011344623458	9.76302752188769e-67	2.78587990337065e-62	MMP19	-3985	distal
chr5:55101384-55102930:GZMA	0.047	0.021	2.12438021268203	0.915763656723358	-0.705650438744933	1.23803043978196e-66	3.53271985991783e-62	GZMA	0	promoter
chr2:236967053-236970573:COPS8	0.066	0.035	2.16503064414558	1.08030347283179	-0.605425465243993	1.24455036594325e-66	3.55132446921906e-62	COPS8	-114739	distal
chr1:160558646-160561123:CD84	0.046	0.019	2.01633734332472	0.884712269105715	-0.678453496530439	1.85006254212363e-66	5.27915346394977e-62	CD84	18350	distal
chr12:91977920-91978841:BTG1	0.042	0.018	2.24081622509042	0.897870778768832	-0.771975446743912	2.52927946855912e-66	7.21729896353345e-62	BTG1	167056	distal
chr1:109793479-109794330:EPS8L3	0.037	0.014	2.22938633464926	0.852212962981595	-0.802010056563617	2.95166800665545e-66	8.42258465699133e-62	EPS8L3	-29453	distal
chr7:1925582-1927483:MAD1L1	0.058	0.029	2.28626956490625	1.01683386950044	-0.704358574728646	3.08691867401968e-66	8.80852243631516e-62	MAD1L1	0	distal
chr1:85297840-85298785:BCL10	0.054	0.025	1.94032075359093	0.946855740056357	-0.594827558456798	3.9369971809747e-66	1.12342214559113e-61	BCL10	-20751	distal
chr2:136225782-136226729:CXCR4	0.052	0.024	1.97978176102402	0.902196209400973	-0.647540605442287	4.32001357285984e-66	1.23271587301555e-61	CXCR4	-107618	distal
chr2:203740343-203742066:CD28	0.067	0.036	2.12743151358632	1.05679477046363	-0.604580444574479	4.37655603287994e-66	1.24885026398229e-61	CD28	33796	distal
chr15:52682698-52684144:KIAA1370	0.042	0.017	1.91721043839848	0.796932695006087	-0.699053088468234	4.64389038637608e-66	1.32513412175241e-61	KIAA1370	-4076	distal
chr14:64673384-64674308:PLEKHG3	0.038	0.015	2.12921091859436	0.851730073509738	-0.756925091584044	7.77143152318077e-66	2.21757798513963e-61	PLEKHG3	-30167	distal
chr8:123534347-123535176:FBXO32	0.043	0.018	2.06552003813814	0.889621727073911	-0.698034376820212	8.72737896102845e-66	2.49035758652947e-61	FBXO32	6030	distal
chr6:118810310-118811024:ASF1A	0.059	0.029	2.02671695491021	0.977026136350967	-0.614421823388928	9.80775102486714e-66	2.79864175494584e-61	ASF1A	-83196	distal
chr1:160682780-160683970:CD48	0.048	0.021	1.88750104665796	0.837992777677291	-0.651690371852383	1.08093032760064e-65	3.08443468980843e-61	CD48	27833	distal
chr22:28822719-28823685:XBP1	0.041	0.018	2.50552215842707	0.924965004683558	-0.864797135894606	1.15584085772249e-65	3.29819188751111e-61	XBP1	-22123	distal
chr5:99037506-99038430:CHD1	0.061	0.031	2.09711870122788	1.01223923830883	-0.622124837656348	1.33531372969067e-65	3.81031772767233e-61	CHD1	-108550	distal
chr7:25028278-25029406:OSBPL3	0.036	0.014	2.19059195378002	0.800957755891998	-0.825059772394961	1.49386502748828e-65	4.2627438559378e-61	OSBPL3	-48091	distal
chr11:45093128-45094193:PRDM11	0.042	0.017	2.15494357474245	0.928327712704768	-0.710263949757181	2.59528350694198e-65	7.40564148705894e-61	PRDM11	-1613	distal
chr2:144382716-144383415:ZEB2	0.035	0.013	2.00629571515412	0.807026961273034	-0.734368895635403	3.24625319745579e-65	9.26318349894009e-61	ZEB2	47519	distal
chr9:137406723-137407460:EXD3	0.024	0.051	0.988412256660424	2.10313311387519	0.642108683657098	3.41754549596252e-65	9.75196607272906e-61	EXD3	15695	distal
chr6:16483002-16484034:ATXN1	0.043	0.018	2.21477879515633	0.899572080919887	-0.759045013592325	3.52037416117649e-65	1.00453876689171e-60	ATXN1	-154722	distal
chr7:50610374-50611253:DDC	0.04	0.016	2.03120357755682	0.857540979846385	-0.706496708787687	3.5980886713998e-65	1.02671460238393e-60	DDC	-44918	distal
chr7:50610374-50611253:GRB10	0.04	0.016	2.03120357755682	0.857540979846385	-0.706496708787687	3.5980886713998e-65	1.02671460238393e-60	GRB10	0	distal
chr12:21456135-21456979:PYROXD1	0.04	0.016	2.03412365954169	0.834869699632087	-0.725602269640793	3.8073572677365e-65	1.08642939634861e-60	PYROXD1	18221	distal
chr2:101223641-101224433:CNOT11	0.05	0.023	2.05246660173271	0.902422612202974	-0.682137742013868	4.01691936532748e-65	1.1462279408962e-60	CNOT11	-28369	distal
chrX:19839788-19841418:SH3KBP1	0.047	0.021	2.10295809258832	0.940567484995358	-0.677165607464118	4.21651588612009e-65	1.20318280810437e-60	SH3KBP1	-40038	distal
chr6:139112858-139113758:HECA	0.058	0.028	2.22187160967102	1.08270077878516	-0.629443421803161	5.64819087841828e-65	1.61171126715666e-60	HECA	-21354	distal
chr11:85749677-85751215:SYTL2	0.045	0.019	2.06561980627741	0.93309002375207	-0.66526996190892	7.69931835873028e-65	2.19700049366369e-60	SYTL2	6510	distal
chr5:159412091-159412937:IL12B	0.06	0.03	1.92466615846282	0.919270789518576	-0.607713679507649	1.01010717484071e-64	2.88234082340796e-60	IL12B	-81205	distal
chr19:38693191-38694419:ACTN4	0.056	0.027	1.9586487554724	0.93023398142655	-0.616162692553241	1.39029986648352e-64	3.96722066901073e-60	ACTN4	45446	distal
chr8:19473196-19473887:CSGALNACT1	0.041	0.017	2.08167609581254	0.869104336125855	-0.721368128526387	1.50922746578928e-64	4.30658057362971e-60	CSGALNACT1	127978	distal
chr20:63533602-63535700:PTK6	0.015	0.038	0.866332837343498	2.07094291300652	0.718475397800029	1.59391152258149e-64	4.5482265296863e-60	PTK6	1654	distal
chr10:125014951-125015919:CTBP2	0.042	0.017	2.06631710491094	0.918705659261505	-0.676373491233656	2.07251127570631e-64	5.91391092522796e-60	CTBP2	-8939	distal
chr10:7269131-7270109:SFMBT2	0.053	0.025	2.02415414008733	0.982233750887853	-0.609404575660994	2.15838496948206e-64	6.15895151041705e-60	SFMBT2	138636	distal
chr6:38571733-38572804:BTBD9	0.046	0.021	2.04890160044115	0.894314376846246	-0.686613812258664	2.45912838078681e-64	7.01712283457516e-60	BTBD9	21531	distal
chr1:100926896-100928470:SLC30A7	0.058	0.029	2.13835403383597	1.05076412764337	-0.613846542956999	2.65638633696067e-64	7.57999841251727e-60	SLC30A7	30643	distal
chr2:7467948-7468682	0.038	0.015	2.20415338266765	0.850432408294269	-0.792080772612133	2.97350773219865e-64	8.48490431382886e-60	---	---	intergenic
chr6:75496153-75496873:FILIP1	0.038	0.015	2.1166553359376	0.84846687088026	-0.753669432234654	3.03893325076851e-64	8.67159603106794e-60	FILIP1	-2416	distal
chr7:159195582-159196317:VIPR2	0.036	0.014	2.08854131349277	0.859700547553893	-0.731855294261321	3.71931490934418e-64	1.06130650938136e-59	VIPR2	-50626	distal
chr17:19771760-19772677:ALDH3A1	0.045	0.021	2.42253737571568	0.957608356547484	-0.805974131424107	5.87435092954122e-64	1.67624603774459e-59	ALDH3A1	-23328	distal
chr17:19771760-19772677:ULK2	0.045	0.021	2.42253737571568	0.957608356547484	-0.805974131424107	5.87435092954122e-64	1.67624603774459e-59	ULK2	0	distal
chr7:151050827-151051588:ASIC3	0.021	0.046	0.972184287544517	2.08690225323739	0.646365432436406	5.94850106580844e-64	1.69740477912844e-59	ASIC3	1942	distal
chr9:105405278-105406167:FSD1L	0.046	0.021	2.17086730227268	0.92672712587446	-0.718725239943825	7.03599298804443e-64	2.00772059913848e-59	FSD1L	-41629	distal
chr9:105405278-105406167:SLC44A1	0.046	0.021	2.17086730227268	0.92672712587446	-0.718725239943825	7.03599298804443e-64	2.00772059913848e-59	SLC44A1	0	distal
chr13:114268228-114269391:CDC16	0.048	0.021	2.06365065860074	0.949945734900739	-0.651817823544742	8.28975861276013e-64	2.3654826201511e-59	CDC16	0	distal
chr13:114268228-114269391:UPF3A	0.048	0.021	2.06365065860074	0.949945734900739	-0.651817823544742	8.28975861276013e-64	2.3654826201511e-59	UPF3A	-12193	distal
chr22:49870021-49870838:ZBED4	0.041	0.017	1.97367531329265	0.84518974024171	-0.688477956675349	1.35328640142368e-63	3.86160274646248e-59	ZBED4	16180	distal
chr6:130259919-130261823:SAMD3	0.059	0.03	1.90181508154899	0.927612193892954	-0.590140753878518	1.3669687488323e-63	3.90064532479296e-59	SAMD3	-36966	distal
chr9:136718216-136720060:FAM69B	0.018	0.043	0.903829254106206	2.05137009102295	0.680553074835191	1.66243943584194e-63	4.74377093017498e-59	FAM69B	-825	promoter
chr17:18476311-18477294:LGALS9C	0.038	0.015	1.88859747350266	0.711068727733363	-0.755471469056788	1.70078920797093e-63	4.85320200494506e-59	LGALS9C	0	promoter
chr7:2849874-2851877:GNA12	0.034	0.013	2.18641434930452	0.788077465476862	-0.83352464144991	1.96396074963734e-63	5.60416199909016e-59	GNA12	-5551	distal
chr16:31176895-31177754:FUS	0.051	0.025	2.06423890757629	0.912925138512372	-0.679748367789432	2.42123522950588e-63	6.90899472739503e-59	FUS	-2356	distal
chr22:40116408-40117456:TNRC6B	0.045	0.02	2.32969431808734	0.939438054553315	-0.779751039971747	2.73892331470143e-63	7.81551767850053e-59	TNRC6B	-60469	distal
chr1:94017202-94017973:ABCA4	0.036	0.014	2.21721406197156	0.875607552471225	-0.778453937522628	2.89976842569505e-63	8.27448920272082e-59	ABCA4	45276	distal
chrY:3002460-3004391:ZFY	0.04	0.017	1.74584697099036	0.665528070285129	-0.72127155583199	3.01299925204168e-63	8.59759336570093e-59	ZFY	66810	distal
chr12:124423633-124424606:NCOR2	0.05	0.023	2.34598284454836	1.08727430657402	-0.680809838584866	3.88598681429665e-63	1.10886633745955e-58	NCOR2	-1080	distal
chr3:113741410-113742594:NAA50	0.032	0.011	1.95944115708069	0.756116220051023	-0.752936445971033	4.52214117017553e-63	1.29039298290959e-58	NAA50	-1824	distal
chr6:144054855-144055987:PLAGL1	0.055	0.026	1.93220115692253	0.934768388295749	-0.599823208394947	4.74690330191067e-63	1.35452885720021e-58	PLAGL1	8612	distal
chr10:62528330-62529050:ZNF365	0.035	0.014	2.17987131423446	0.825452192665009	-0.800714496389415	5.82285017947865e-63	1.66155029871423e-58	ZNF365	7883	distal
chr9:21919470-21920325:CDKN2A	0.035	0.013	2.12083296771334	0.845934707337299	-0.757579619594972	5.84631341757042e-63	1.66824553370372e-58	CDKN2A	51007	distal
chr9:21919470-21920325:MTAP	0.035	0.013	2.12083296771334	0.845934707337299	-0.757579619594972	5.84631341757042e-63	1.66824553370372e-58	MTAP	0	distal
chr9:21919470-21920325:RP11-145E5.5	0.035	0.013	2.12083296771334	0.845934707337299	-0.757579619594972	5.84631341757042e-63	1.66824553370372e-58	RP11-145E5.5	0	distal
chr12:68119286-68120429:IFNG	0.04	0.016	2.00682732017802	0.836854893135359	-0.711004355692532	6.15867941775611e-63	1.75737917185671e-58	IFNG	39318	distal
chr9:92953867-92954817:FGD3	0.053	0.026	2.12857904298526	0.941686496838307	-0.688197270764768	8.96373212092217e-63	2.55780096070514e-58	FGD3	6417	distal
chr11:14554772-14555529:PSMA1	0.042	0.018	2.25353552083905	0.913628802815647	-0.765697295192666	9.61087215116988e-63	2.74246236833632e-58	PSMA1	-34077	distal
chr6:142902399-142904246:HIVEP2	0.06	0.031	2.01405457917224	1.00797904389663	-0.58596132901315	1.02415746249263e-62	2.92243331922271e-58	HIVEP2	40785	distal
chr5:113022415-113023288:DCP2	0.047	0.021	2.08118776396417	0.936863288962847	-0.669764474461515	1.31447311106767e-62	3.75084902243159e-58	DCP2	45680	distal
chr5:113022415-113023288:MCC	0.047	0.021	2.08118776396417	0.936863288962847	-0.669764474461515	1.31447311106767e-62	3.75084902243159e-58	MCC	0	distal
chr11:118045900-118046995:RP11-652L8.2	0.045	0.021	2.12571886485751	0.899627460293409	-0.71847150798245	2.32630279784521e-62	6.63810503365131e-58	RP11-652L8.2	0	distal
chr11:118045900-118046995:TMPRSS4	0.045	0.021	2.12571886485751	0.899627460293409	-0.71847150798245	2.32630279784521e-62	6.63810503365131e-58	TMPRSS4	-30017	distal
chr14:106177089-106177834:IGHV1-18	0.042	0.018	1.91363570048457	0.819546810639713	-0.679241337527169	3.10290810202427e-62	8.85414826912625e-58	IGHV1-18	7560	distal
chr6:44925271-44925927:SUPT3H	0.035	0.014	2.12732555136778	0.809340717391464	-0.789465302351127	3.2942563824328e-62	9.400160587272e-58	SUPT3H	29583	distal
chr10:6591479-6593676:PRKCQ	0.047	0.022	2.27076551087078	0.941891642133483	-0.752165632426763	3.6148162204485e-62	1.03148780850498e-57	PRKCQ	-11179	distal
chr1:116325597-116326653:ATP1A1	0.045	0.02	2.26876714945324	0.96574573743781	-0.733669884397765	3.68767799415122e-62	1.05227891563105e-57	ATP1A1	-46607	distal
chr17:35529805-35531581:SLFN12L	0.042	0.018	2.00372543567631	0.889973017207674	-0.668387307606674	4.27353984254105e-62	1.21945459406909e-57	SLFN12L	6280	distal
chr20:51497412-51498849:NFATC2	0.062	0.032	2.02477958214023	0.987451971571762	-0.605910019100234	5.24320913086338e-62	1.49614972549187e-57	NFATC2	43870	distal
chr10:11863249-11864280:PROSER2	0.045	0.02	2.05827086366512	0.904915393994376	-0.682989265917382	5.39823746447292e-62	1.54038706048735e-57	PROSER2	-5364	distal
chr3:14175356-14176193:LSM3	0.04	0.017	2.1028251089942	0.836218210584536	-0.75684486709935	5.98322896699736e-62	1.7073143857327e-57	LSM3	-2165	distal
chr3:14175356-14176193:XPC	0.04	0.017	2.1028251089942	0.836218210584536	-0.75684486709935	5.98322896699736e-62	1.7073143857327e-57	XPC	0	distal
chr22:20122651-20123833:RANBP1	0.048	0.022	2.16775418755908	0.920161287974495	-0.722232890800349	9.51143034314106e-62	2.7140866484153e-57	RANBP1	5104	distal
chr5:157248710-157249581:CYFIP2	0.042	0.018	2.19208028560606	0.94146474630478	-0.71735142736244	1.1607129628465e-61	3.31209443948249e-57	CYFIP2	-16498	distal
chr5:157248710-157249581:ITK	0.042	0.018	2.19208028560606	0.94146474630478	-0.71735142736244	1.1607129628465e-61	3.31209443948249e-57	ITK	0	distal
chr1:32798832-32799849:YARS	0.043	0.019	2.02646610018482	0.895253059989524	-0.67524369702023	1.21029981822342e-61	3.45359053130054e-57	YARS	17395	distal
chr2:175956-176854:SH3YL1	0.041	0.017	2.26054330899239	0.926562779203308	-0.759083184229249	1.54314674771936e-61	4.40336924461718e-57	SH3YL1	84469	distal
chr8:141152086-141153327:DENND3	0.047	0.021	2.00953668046347	0.945959993911462	-0.629059349798007	1.79370502362942e-61	5.11833728492656e-57	DENND3	15461	distal
chr5:157389921-157391119:CYFIP2	0.051	0.025	1.99168076500905	0.895125587207641	-0.658662780093731	2.0269433960969e-61	5.7838829807625e-57	CYFIP2	0	distal
chr5:157389921-157391119:FNDC9	0.051	0.025	1.99168076500905	0.895125587207641	-0.658662780093731	2.0269433960969e-61	5.7838829807625e-57	FNDC9	-44201	distal
chr14:89626026-89627004:FOXN3	0.04	0.016	1.98358772695818	0.908073776190296	-0.644931242717095	2.22281583535661e-61	6.34280498619008e-57	FOXN3	-6878	distal
chr13:74230770-74231721	0.034	0.013	2.32654548194077	0.865586305582742	-0.834395655469065	3.46149405022619e-61	9.87737327232045e-57	---	---	intergenic
chr16:79278375-79279193	0.056	0.028	2.17380377704169	1.03200254556757	-0.643310725724225	3.59184893970129e-61	1.02493409494376e-56	---	---	intergenic
chr22:36289750-36290527:APOL1	0.041	0.018	2.21360076739857	0.863204833187283	-0.786404423963971	4.13629987757474e-61	1.18029317006595e-56	APOL1	36610	distal
chr22:36289750-36290527:MYH9	0.041	0.018	2.21360076739857	0.863204833187283	-0.786404423963971	4.13629987757474e-61	1.18029317006595e-56	MYH9	0	distal
chr11:73365554-73366825:ARHGEF17	0.055	0.027	2.04585396353487	0.953663917431223	-0.640664465622986	4.45491460945688e-61	1.27120988380852e-56	ARHGEF17	0	distal
chr11:73365554-73366825:RELT	0.055	0.027	2.04585396353487	0.953663917431223	-0.640664465622986	4.45491460945688e-61	1.27120988380852e-56	RELT	-9439	distal
chr22:38108385-38110483:BAIAP2L2	0.021	0.045	0.920627327084278	2.0366797313932	0.660917150407754	4.56203035619898e-61	1.30177536214138e-56	BAIAP2L2	162	distal
chr17:68255392-68256601:AMZ2	0.043	0.018	1.85821481981557	0.837903569904838	-0.637053277548453	4.63174079071711e-61	1.32166723463113e-56	AMZ2	0	distal
chr17:68255392-68256601:ARSG	0.043	0.018	1.85821481981557	0.837903569904838	-0.637053277548453	4.63174079071711e-61	1.32166723463113e-56	ARSG	-2581	distal
chr7:96285383-96286360:SLC25A13	0.042	0.018	2.18748032425782	0.955537015899094	-0.704851591738645	5.15675864053001e-61	1.47148107807524e-56	SLC25A13	35733	distal
chr5:109856936-109858175:MAN2A1	0.037	0.015	2.21330451040859	0.820223051935606	-0.819942454468661	6.82023364973036e-61	1.94615367195056e-56	MAN2A1	167571	distal
chr7:29337181-29338209:CHN2	0.049	0.023	2.06540126548959	0.989227580364806	-0.623867598000471	8.11845910632254e-61	2.31660230598914e-56	CHN2	-141503	distal
chr7:29337181-29338209:RP5-1189D6.2	0.049	0.023	2.06540126548959	0.989227580364806	-0.623867598000471	8.11845910632254e-61	2.31660230598914e-56	RP5-1189D6.2	0	distal
chr6:137155587-137156395:IL22RA2	0.042	0.018	1.91158396848494	0.892764862762109	-0.621309029020951	8.12074865073952e-61	2.31725562748852e-56	IL22RA2	17253	distal
chr3:30353944-30355202	0.046	0.021	2.21571914742344	0.947430979173902	-0.723569213560628	9.04212404884133e-61	2.58017009733687e-56	---	---	intergenic
chr10:84177149-84178246:C10orf99	0.05	0.024	2.10404091771049	0.939946979998196	-0.678130352203888	9.31170303465139e-61	2.65709446093778e-56	C10orf99	3412	distal
chr3:66297442-66298997:SLC25A26	0.035	0.013	2.16270793365609	0.88770746580906	-0.744525123058012	1.09661195635813e-60	3.12918221746794e-56	SLC25A26	54240	distal
chr17:78241490-78243126:TMEM235	0.01	0.028	0.625855569449368	1.91773588484609	0.843650192212065	1.10600054672061e-60	3.15597256006727e-56	TMEM235	9467	distal
chr9:2655274-2656112:VLDLR	0.034	0.013	2.20956888413966	0.883111419691691	-0.769261160940943	1.33199288251774e-60	3.80084169026437e-56	VLDLR	33175	distal
chr12:106747491-106748611:RFX4	0.043	0.019	2.34255973466042	1.05743509057136	-0.700106426661694	1.36633285740184e-60	3.89883080859616e-56	RFX4	0	distal
chr12:106747491-106748611:RIC8B	0.043	0.019	2.34255973466042	1.05743509057136	-0.700106426661694	1.36633285740184e-60	3.89883080859616e-56	RIC8B	-25984	distal
chr12:89397936-89398793:DUSP6	0.036	0.014	2.26842967647014	0.954520516725578	-0.741782927715909	1.60059844875153e-60	4.5673076735125e-56	DUSP6	-44666	distal
chr1:54226998-54228214:MRPL37	0.012	0.032	0.739118179378817	2.19088711056969	0.87560159651981	1.69625390984422e-60	4.84026053174048e-56	MRPL37	26803	distal
chr1:54226998-54228214:SSBP3	0.012	0.032	0.739118179378817	2.19088711056969	0.87560159651981	1.69625390984422e-60	4.84026053174048e-56	SSBP3	0	distal
chr2:44955324-44956158:SIX3	0.016	0.038	0.842074043835298	2.03563213652521	0.720665919882976	1.94933229607246e-60	5.56241970684276e-56	SIX3	13427	distal
chr7:44769472-44770369:ZMIZ2	0.037	0.015	2.06072241272779	0.845473901348846	-0.729880872736534	2.76289904489223e-60	7.88393242459997e-56	ZMIZ2	13223	distal
chr2:152729923-152731198:ARL6IP6	0.039	0.016	1.93109003158453	0.860120112044646	-0.656041500307399	3.22099037377823e-60	9.19109603157617e-56	ARL6IP6	0	distal
chr2:152729923-152731198:PRPF40A	0.039	0.016	1.93109003158453	0.860120112044646	-0.656041500307399	3.22099037377823e-60	9.19109603157617e-56	PRPF40A	-11943	distal
chr14:63650087-63651051:WDR89	0.051	0.025	2.25552190944964	1.02199204173104	-0.687111528776636	3.4621519885992e-60	9.87925069946781e-56	WDR89	-8227	distal
chr10:69203988-69204578:HKDC1	0.036	0.014	1.99939610404905	0.803838319240951	-0.733602025475082	3.61330286333273e-60	1.031055972052e-55	HKDC1	-15725	distal
chr10:69203988-69204578:SUPV3L1	0.036	0.014	1.99939610404905	0.803838319240951	-0.733602025475082	3.61330286333273e-60	1.031055972052e-55	SUPV3L1	0	distal
chr17:17108829-17110906:MPRIP	0.054	0.026	2.04843615580481	1.00518764558644	-0.604332081080871	4.97601032382237e-60	1.41990454590271e-55	MPRIP	65981	distal
chr2:28583831-28584835:PLB1	0.011	0.029	0.646119270414592	1.99705723162546	0.864477762978124	7.34134265691414e-60	2.09485212715045e-55	PLB1	87761	distal
chr1:32886169-32887015:HPCA	0.013	0.034	0.815545239814583	2.05847593260529	0.752410043728889	7.4686285337255e-60	2.13117315209857e-55	HPCA	0	promoter
chr20:57414016-57417346:RBM38	0.021	0.045	0.899342849648321	1.92548474484561	0.623175345815708	7.61729674237189e-60	2.17359562543582e-55	RBM38	21787	distal
chr3:18725484-18726253	0.037	0.015	2.22636903777879	0.942620429019335	-0.731907427422911	7.8388275989103e-60	2.23680945534905e-55	---	---	intergenic
chr11:47920122-47921030:PTPRJ	0.032	0.012	1.90570542397889	0.674769666743451	-0.794925758659983	8.02874219263681e-60	2.29100158466891e-55	PTPRJ	-59528	distal
chr7:2101847-2102980:MAD1L1	0.038	0.015	2.003718265706	0.853697928723993	-0.69634333411348	8.13549683706916e-60	2.32146402245769e-55	MAD1L1	127438	distal
chr4:123616806-123617650	0.051	0.025	1.99959901966229	0.946748534855122	-0.623703116571888	8.61808266217904e-60	2.45916988765279e-55	---	---	intergenic
chr17:50779718-50780623:AC005921.2	0.05	0.025	2.13403936099019	0.929710616295377	-0.699638785052503	9.87972285483819e-60	2.81917891662808e-55	AC005921.2	-12162	distal
chr17:57599209-57600575:CCDC182	0.036	0.015	2.16596917637719	0.855173896894527	-0.771092783688673	1.02858858292294e-59	2.93507752137062e-55	CCDC182	144737	distal
chr17:57599209-57600575:MSI2	0.036	0.015	2.16596917637719	0.855173896894527	-0.771092783688673	1.02858858292294e-59	2.93507752137062e-55	MSI2	0	distal
chr12:117062957-117064037:TESC	0.041	0.018	2.10061152259026	0.901347366425046	-0.705530652117066	1.12779780972021e-59	3.21817105003661e-55	TESC	35409	distal
chr19:34217941-34218965:KIAA0355	0.056	0.028	2.04622469275956	1.01399774426457	-0.596960292978546	1.4652199787597e-59	4.18100520939079e-55	KIAA0355	-35572	distal
chr19:34217941-34218965:LSM14A	0.056	0.028	2.04622469275956	1.01399774426457	-0.596960292978546	1.4652199787597e-59	4.18100520939079e-55	LSM14A	0	distal
chr1:235304438-235305590:ARID4B	0.045	0.02	1.95219874051416	0.917198307024412	-0.622790275059177	1.73154213882154e-59	4.94095549312728e-55	ARID4B	0	distal
chr1:235304438-235305590:GGPS1	0.045	0.02	1.95219874051416	0.917198307024412	-0.622790275059177	1.73154213882154e-59	4.94095549312728e-55	GGPS1	-21760	distal
chr6:137388904-137389778:OLIG3	0.043	0.019	2.11510698913111	0.933390387371776	-0.688148739978179	1.81031230623122e-59	5.16572616583078e-55	OLIG3	104472	distal
chr19:18232899-18233909:LLNLR-225F10.1	0.02	0.043	0.916657897679093	2.0470620849205	0.668826040911129	3.23784358017925e-59	9.2391866560415e-55	LLNLR-225F10.1	0	distal
chr19:18232899-18233909:PDE4C	0.02	0.043	0.916657897679093	2.0470620849205	0.668826040911129	3.23784358017925e-59	9.2391866560415e-55	PDE4C	0	promoter
chr15:65828266-65829629:DENND4A	0.061	0.032	2.07389780993121	1.04666803873027	-0.586792082168783	3.24854818838907e-59	9.26973225556823e-55	DENND4A	-36143	distal
chr3:13069317-13070167:IQSEC1	0.04	0.017	2.10070426910701	0.865952720317518	-0.732683503390617	3.78042789958338e-59	1.07874510114612e-54	IQSEC1	2950	distal
chr17:5184148-5184819:ZNF594	0.045	0.021	2.21701564830297	0.979531786873968	-0.700563719582882	4.10170982880528e-59	1.17042289964959e-54	ZNF594	0	promoter
chr12:11500404-11501075:PRB1	0.024	0.049	0.971379899452403	2.02318809461974	0.616864921205183	4.16300710077031e-59	1.18791407620481e-54	PRB1	-104839	distal
chr1:172674798-172675782:FASLG	0.038	0.015	2.09786614688386	0.936059395544838	-0.678151596146139	5.04722905586651e-59	1.44022681109151e-54	FASLG	15655	distal
chr7:149599667-149601309:ZNF746	0.043	0.019	1.93067113593053	0.868887787452978	-0.649051136892151	6.20034992995775e-59	1.76926985251344e-54	ZNF746	-101851	distal
chr7:155069889-155070495:HTR5A	0.025	0.05	1.0223618755105	2.08954703244238	0.611354163914704	6.63773353309688e-59	1.8940772636692e-54	HTR5A	0	promoter
chr10:127293373-127294183:DOCK1	0.045	0.021	2.29419159915231	0.957682492052941	-0.750777669050562	9.99996841066634e-59	2.85349098598364e-54	DOCK1	0	distal
chr10:127293373-127294183:FAM196A	0.045	0.021	2.29419159915231	0.957682492052941	-0.750777669050562	9.99996841066634e-59	2.85349098598364e-54	FAM196A	-97216	distal
chr4:184534380-184535453:IRF2	0.035	0.014	1.97492280748263	0.802960326733662	-0.722484582917584	1.09418197169651e-58	3.12224825623599e-54	IRF2	-59801	distal
chr10:33109550-33110784:ITGB1	0.042	0.018	2.1416380966093	0.940327275013589	-0.69521698553257	1.2906693693672e-58	3.6829250454893e-54	ITGB1	-151342	distal
chr4:113564481-113565607:CAMK2D	0.047	0.022	1.84235347831016	0.876511491312877	-0.599032855957904	1.48187284676304e-58	4.22852416823834e-54	CAMK2D	195461	distal
chr13:98484430-98485595:STK24	0.03	0.055	0.865597561677459	1.86901648982089	0.620918452034609	1.63186882287842e-58	4.65653768608357e-54	STK24	36403	distal
chr14:97993650-97994775	0.046	0.022	2.11072244420761	0.980782438445323	-0.651179246583123	1.74501115406476e-58	4.97938932812379e-54	---	---	intergenic
chrX:119821566-119822198:RPL39	0.045	0.021	1.99171114928887	0.916108355347034	-0.642791741912756	1.96157224877984e-58	5.59734641189328e-54	RPL39	-29924	distal
chr3:128112373-128113260:RUVBL1	0.042	0.018	2.00287438883253	0.921640345716463	-0.644005781260728	2.20890715454648e-58	6.30311656549838e-54	RUVBL1	10564	distal
chr6:153129729-153131898:RGS17	0.047	0.022	1.95636982620507	0.918789586485185	-0.623630239296617	2.45103404059382e-58	6.99402563483445e-54	RGS17	0	promoter
chr6:157099935-157100657:ARID1B	0.04	0.017	2.1247000729982	0.927074667702857	-0.697305245778399	2.62446037228714e-58	7.48889767232135e-54	ARID1B	15164	distal
chr14:105032667-105034751:CDCA4	0.041	0.018	1.88714824183332	0.853654679223843	-0.639272678602314	2.63947789306812e-58	7.53175016786987e-54	CDCA4	-11520	distal
chr3:50429626-50430947:CACNA2D2	0.034	0.014	2.16516345466973	0.794802304013868	-0.818455063778299	3.03125899707567e-58	8.64969754815544e-54	CACNA2D2	0	distal
chr3:50429626-50430947:TMEM115	0.034	0.014	2.16516345466973	0.794802304013868	-0.818455063778299	3.03125899707567e-58	8.64969754815544e-54	TMEM115	-70017	distal
chr22:36166047-36167435:APOL3	0.053	0.027	2.06519841212689	1.01365481847383	-0.606164066282065	3.72703382757142e-58	1.06350910269751e-53	APOL3	0	promoter
chr5:95261331-95262126:MCTP1	0.029	0.01	2.03435658644688	0.800900123855345	-0.752672462753945	4.01301406508016e-58	1.14511356347062e-53	MCTP1	22449	distal
chr16:86566529-86568704:FOXC2	0.016	0.038	0.915961256193819	2.05248411154813	0.671915398111971	6.1926848227702e-58	1.76708261417748e-53	FOXC2	0	promoter
chr2:201211896-201212670:CASP10	0.05	0.024	1.96960847233063	0.945216304722114	-0.610342142261519	6.56441434181959e-58	1.87315563243822e-53	CASP10	0	distal
chr2:201211896-201212670:CASP8	0.05	0.024	1.96960847233063	0.945216304722114	-0.610342142261519	6.56441434181959e-58	1.87315563243822e-53	CASP8	-20773	distal
chr17:48453311-48454069:SKAP1	0.035	0.014	2.21058625474475	0.884462830935226	-0.768683418651088	7.76642630695197e-58	2.21614974668875e-53	SKAP1	-23093	distal
chr10:91200753-91202198:PCGF5	0.044	0.02	1.97636850317575	0.876671111206808	-0.665377318749989	9.99362927927513e-58	2.85168211484116e-53	PCGF5	-17953	distal
chr12:79927946-79928608:PPP1R12A	0.046	0.022	2.06071989679416	0.966750997331667	-0.638056706808614	1.16921122772919e-57	3.33634423832526e-53	PPP1R12A	6323	distal
chr9:96149852-96150892:HSD17B3	0.033	0.013	2.10999762402546	0.809385294626103	-0.781413826725717	1.23520168618359e-57	3.52464801152486e-53	HSD17B3	151260	distal
chr5:139565204-139566286:UBE2D2	0.06	0.032	1.99307711994816	0.99303152791894	-0.58666491948984	1.28773491522541e-57	3.67455158059569e-53	UBE2D2	3176	distal
chr1:167617057-167618174:RCSD1	0.05	0.024	1.7837781186414	0.81119285730641	-0.620104051770091	1.87804784341059e-57	5.35900952117213e-53	RCSD1	-11919	distal
chr10:22570435-22571400:PIP4K2A	0.037	0.016	2.16517541563179	0.898781189497112	-0.73721179404254	2.96199474482327e-57	8.45205200435321e-53	PIP4K2A	20313	distal
chr2:74290163-74291492:RP11-287D1.3	0.042	0.019	2.14484723708662	0.938149217208134	-0.698310291546256	3.05304636239426e-57	8.71186779509203e-53	RP11-287D1.3	0	distal
chr2:74290163-74291492:SLC4A5	0.042	0.019	2.14484723708662	0.938149217208134	-0.698310291546256	3.05304636239426e-57	8.71186779509203e-53	SLC4A5	23531	distal
chr8:141156865-141157714:DENND3	0.051	0.025	2.01398432347207	0.977210427569303	-0.608205492907567	3.72714811204921e-57	1.06354171377324e-52	DENND3	20240	distal
chr15:94306593-94307604:MCTP2	0.04	0.017	2.03485779347247	0.871747489360581	-0.697243097346487	3.99487739002618e-57	1.13993826324397e-52	MCTP2	8328	distal
chr1:144101434-144104881:FAM72C	0.016	0.039	0.871284527030289	1.85730164827489	0.610624415450069	4.55760786921725e-57	1.30051340548114e-52	FAM72C	-129470	distal
chr20:50282296-50284607:CEBPB	0.03	0.055	0.91059070604809	1.9102331651939	0.607115993320695	6.03354320882073e-57	1.721671554637e-52	CEBPB	91563	distal
chr22:19723047-19724552:GP1BB	0.02	0.043	0.883779135056329	1.91610390831014	0.630412302407662	6.14503613913428e-57	1.75348606230197e-52	GP1BB	103	distal
chr22:19723047-19724552:SEPT5	0.02	0.043	0.883779135056329	1.91610390831014	0.630412302407662	6.14503613913428e-57	1.75348606230197e-52	SEPT5	0	distal
chr22:19723047-19724552:SEPT5-GP1BB	0.02	0.043	0.883779135056329	1.91610390831014	0.630412302407662	6.14503613913428e-57	1.75348606230197e-52	SEPT5-GP1BB	0	distal
chr1:192936312-192937827:UCHL5	0.036	0.014	1.80972545708937	0.800722746777678	-0.641853099380615	6.27505134932056e-57	1.79058590252862e-52	UCHL5	121522	distal
chr14:87994897-87996145:GALC	0.033	0.013	1.71648234532587	0.699114716189408	-0.676956411072892	8.32727491322944e-57	2.37618789649002e-52	GALC	-1233	distal
chr6:10726523-10727459:TMEM14C	0.041	0.018	2.04036538511444	0.914854490571927	-0.667009948138044	8.35534072176145e-57	2.38419647495463e-52	TMEM14C	3549	distal
chr9:122213487-122214440:LHX6	0.02	0.044	0.953140240365594	1.95057337680078	0.595199794609074	8.53273574078667e-57	2.43481614363348e-52	LHX6	0	promoter
chr1:85027146-85028155:MCOLN3	0.05	0.024	1.93746668986024	0.94998188213943	-0.591111772439156	8.89707981506954e-57	2.53878172523009e-52	MCOLN3	20291	distal
chr1:85027146-85028155:WDR63	0.05	0.024	1.93746668986024	0.94998188213943	-0.591111772439156	8.89707981506954e-57	2.53878172523009e-52	WDR63	0	distal
chr1:198166952-198168571:NEK7	0.048	0.023	1.95371257613188	0.965627340646174	-0.587539615270251	1.35111106233342e-56	3.85539541636843e-52	NEK7	9832	distal
chr2:70851536-70852214:CD207	0.042	0.018	2.12431474749977	1.04636388595099	-0.610477090759232	1.45806791570044e-56	4.16059679745119e-52	CD207	-15715	distal
chr19:46262738-46263415:IGFL1	0.034	0.014	2.0753158394036	0.850444413691745	-0.732862786394733	1.86843486920312e-56	5.3315788992711e-52	IGFL1	32987	distal
chr19:50639063-50640120:SYT3	0.016	0.037	0.939515692967151	2.16682620482797	0.707341245529415	3.07173525650067e-56	8.76519655442466e-52	SYT3	0	promoter
chr17:68253221-68254052:AMZ2	0.043	0.019	2.05540452232069	0.978154043554187	-0.627208622700707	4.55624518475771e-56	1.30012456347061e-51	AMZ2	3035	distal
chr6:90110818-90111690:BACH2	0.041	0.018	2.1036547928968	0.946986076535497	-0.67272553428927	4.64096813698628e-56	1.32430025788903e-51	BACH2	185052	distal
chr5:127785082-127786147:CCDC192	0.044	0.02	2.06383507300651	1.00931699236698	-0.608633455320916	5.11025778986082e-56	1.45821206033678e-51	CCDC192	81694	distal
chr8:26045189-26045796:EBF2	0.017	0.038	0.882603804178238	2.09134122592149	0.715503494074399	7.60384820299888e-56	2.16975808472573e-51	EBF2	0	promoter
chr18:44507488-44508619:SETBP1	0.041	0.018	1.85173185679775	0.872077013495221	-0.607198548423037	1.11795941503366e-55	3.19009719079854e-51	SETBP1	-171554	distal
chr1:210332079-210333336:HHAT	0.043	0.02	1.70184554120509	0.789676231767068	-0.594246586373704	1.6905458213404e-55	4.82397250119482e-51	HHAT	2780	distal
chr7:55469095-55469886:VOPP1	0.037	0.016	2.24107488376397	0.902030481006757	-0.768931987637677	2.63067909953639e-55	7.50664281052709e-51	VOPP1	46191	distal
chr1:12201110-12202222:TNFRSF1B	0.045	0.021	2.08248006708476	0.991929993606099	-0.629924620674293	2.88499285238008e-55	8.23232710426655e-51	TNFRSF1B	0	distal
chr1:12201110-12202222:VPS13D	0.045	0.021	2.08248006708476	0.991929993606099	-0.629924620674293	2.88499285238008e-55	8.23232710426655e-51	VPS13D	-27810	distal
chr7:139482828-139484396:KLRG2	0.025	0.048	0.98242752029541	2.1105596610148	0.64990605723738	3.52178684300726e-55	1.00494187565212e-50	KLRG2	0	promoter
chr3:125835875-125837255:ALG1L	0.038	0.016	1.93634289498763	0.864186833763084	-0.655473992501571	4.02111182843555e-55	1.14742426024408e-50	ALG1L	97218	distal
chr5:132662951-132664665:IL13	0.051	0.025	1.88768366400655	0.893856532462168	-0.608585663737208	5.12548775177923e-55	1.4625579299702e-50	IL13	4779	distal
chr8:29655388-29656889	0.008	0.024	0.57243057284371	1.85883002061157	0.862428523688237	5.76884790093049e-55	1.64614074853051e-50	---	---	intergenic
chr2:112841178-112842183:IL1B	0.029	0.01	1.80774599464988	0.690814035648691	-0.731694433283972	6.58084807384931e-55	1.8778449978729e-50	IL1B	-4276	distal
chr7:150483496-150485182:GIMAP7	0.039	0.017	2.06054544737987	0.887031747263221	-0.697670096591684	7.47109878255348e-55	2.13187803760164e-50	GIMAP7	-29648	distal
chr13:113448831-113449836:ADPRHL1	0.035	0.014	1.8574182614556	0.829720412938597	-0.643089012691863	8.00238608808782e-55	2.28348087023586e-50	ADPRHL1	0	promoter
chr18:3305142-3305815:MYL12B	0.043	0.02	2.03298576805862	0.958413442911502	-0.631053362192924	8.74130733778282e-55	2.49433204883633e-50	MYL12B	42187	distal
chr3:71372610-71373594:FOXP1	0.04	0.019	2.46559156081721	0.986590569932936	-0.802807066592423	8.78730571982532e-55	2.50745768715216e-50	FOXP1	-67851	distal
chr11:35066065-35067568:CD44	0.031	0.012	2.08180320208279	0.822689116127668	-0.757706225582636	1.02141693874578e-54	2.91461323471107e-50	CD44	-71302	distal
chr1:214427690-214428433:PTPN14	0.041	0.018	2.02862604688766	0.938634094269524	-0.643622926476014	1.0769709079287e-54	3.07313648577455e-50	PTPN14	122790	distal
chr20:24157035-24157727:GGTLC1	0.046	0.022	2.16111811902315	1.05349092403276	-0.622356373360437	1.17314410298379e-54	3.34756669786424e-50	GGTLC1	-168257	distal
chr20:5039006-5039851:SLC23A2	0.048	0.023	2.0472322240059	1.001186323451	-0.606643951589156	1.9207711963221e-54	5.48092060870512e-50	SLC23A2	-28714	distal
chr11:14713599-14714397:PDE3B	0.036	0.015	2.18402241148843	0.929332037366144	-0.722749038600192	2.07499511422116e-54	5.92099855843007e-50	PDE3B	69769	distal
chr12:12465905-12466720:BORCS5	0.047	0.023	2.19404125464966	0.987269990802288	-0.684595056234672	2.1959157103303e-54	6.26604547942752e-50	BORCS5	0	distal
chr12:12465905-12466720:DUSP16	0.047	0.023	2.19404125464966	0.987269990802288	-0.684595056234672	2.1959157103303e-54	6.26604547942752e-50	DUSP16	95663	distal
chr2:739908-741120:TMEM18	0.035	0.015	1.85050230568559	0.799298212228575	-0.663781852513592	2.38882576950174e-54	6.81651433327322e-50	TMEM18	-62470	distal
chr3:56694774-56695666:FAM208A	0.032	0.013	2.08387551211599	0.902589849966854	-0.696779941918681	3.84693231810016e-54	1.09772213696988e-49	FAM208A	-11538	distal
chr1:93758566-93759512:BCAR3	0.031	0.012	2.2457066990957	0.857404788797381	-0.80524437585513	4.26261141454895e-54	1.21633616714154e-49	BCAR3	-76738	distal
chr17:75534846-75535839:LLGL2	0.055	0.028	2.03963772219083	1.01061879076628	-0.596259811452018	4.79303199025685e-54	1.36769167841979e-49	LLGL2	2354	distal
chr20:20603129-20603929:RALGAPA2	0.04	0.018	2.0467922512612	0.927553479928583	-0.660520243459563	5.01599327204553e-54	1.43131368017819e-49	RALGAPA2	-90472	distal
chr17:78784894-78785799:CYTH1	0.04	0.018	2.07745782435335	0.933382617841571	-0.670611908924052	5.1348417330325e-54	1.46522708852082e-49	CYTH1	-2598	distal
chr2:97745334-97746045:ZAP70	0.044	0.021	2.00126868104348	0.957983503877266	-0.616203868164257	5.2815813273545e-54	1.50709923176061e-49	ZAP70	10929	distal
chr11:35176879-35178194:CD44	0.048	0.024	2.14245952261519	1.00171356985343	-0.650658611562703	8.51930482674401e-54	2.4309836323114e-49	CD44	-2189	distal
chr17:66330981-66332002:PRKCA	0.04	0.019	2.3705575716242	0.994022975860448	-0.757305234660525	9.1111814530111e-54	2.59987562761672e-49	PRKCA	28156	distal
chr20:32285326-32286451:KIF3B	0.043	0.02	1.7504447128589	0.826945130748719	-0.590231597749011	9.68216072734452e-54	2.76280456354776e-49	KIF3B	7663	distal
chr2:160394042-160394619:RBMS1	0.032	0.013	2.06644576921117	0.802834942638051	-0.76630011899009	1.31328420359278e-53	3.747456474952e-49	RBMS1	13270	distal
chr2:231425358-231427566:B3GNT7	0.048	0.025	2.04710915953345	0.889634442482262	-0.689334017829674	1.54280281818562e-53	4.40238784169266e-49	B3GNT7	29816	distal
chr8:70141231-70142640:NCOA2	0.044	0.021	1.93671943494448	0.886844797517945	-0.638229682752335	1.59087998079072e-53	4.53957602518633e-49	NCOA2	0	distal
chr8:70141231-70142640:PRDM14	0.044	0.021	1.93671943494448	0.886844797517945	-0.638229682752335	1.59087998079072e-53	4.53957602518633e-49	PRDM14	-69905	distal
chr10:109910070-109910838:XPNPEP1	0.041	0.019	2.08134633242362	0.967720002662851	-0.647035898771325	2.64867222821496e-53	7.55798620321138e-49	XPNPEP1	12673	distal
chr19:33160190-33161055:WDR88	0.04	0.018	2.07804231138248	0.910978288251106	-0.68770167627458	4.5784743383746e-53	1.30646765245519e-48	WDR88	28097	distal
chr7:7156860-7158196:C1GALT1	0.05	0.026	2.02359785058666	0.975831975055495	-0.61380600346602	4.72057192382532e-53	1.34701519846356e-48	C1GALT1	-24419	distal
chr3:105882370-105883247:CBLB	0.039	0.018	2.09518595040466	0.900454571547971	-0.703681545820738	7.85857299919385e-53	2.24244380531997e-48	CBLB	-13328	distal
chr11:95699390-95700911:FAM76B	0.046	0.023	1.98609377294207	0.938518134314362	-0.623305240269826	8.09627271731849e-53	2.31027141988683e-48	FAM76B	88650	distal
chr2:202642765-202643998:FAM117B	0.034	0.015	2.30513763757008	0.883440589399041	-0.811339825758037	1.20919346182391e-52	3.45043354331453e-48	FAM117B	7578	distal
chr17:36198628-36199649:CCL3L3	0.036	0.015	1.94272999433019	0.883921639281389	-0.643416218017885	1.45258653938633e-52	4.14495569013889e-48	CCL3L3	-1871	distal
chr18:9082614-9084356:NDUFV2	0.042	0.02	1.99536368283899	0.949764080717132	-0.619431608790526	1.51074029212858e-52	4.3108974235889e-48	NDUFV2	-18274	distal
chr19:14564143-14564968:TECR	0.015	0.034	0.840173096766375	1.95588206754613	0.683747230166632	1.77082021435172e-52	5.05303548165264e-48	TECR	1788	distal
chr12:120249879-120251002:PXN	0.047	0.023	1.95609183705996	0.966673730700272	-0.587933454729071	1.90381294525312e-52	5.43253023927977e-48	PXN	0	promoter
chr15:63193692-63194515:RAB8B	0.035	0.015	2.03662091743835	0.886564535478274	-0.686705365453809	2.16117602264683e-52	6.16691578062272e-48	RAB8B	4224	distal
chr2:173149468-173150158:MAP3K20	0.035	0.015	2.00775522733475	0.950200508654451	-0.625064703133685	2.53006043740477e-52	7.21952745813452e-48	MAP3K20	73510	distal
chr2:110993460-110994811:ACOXL	0.033	0.013	1.83900865473769	0.850997949116357	-0.617083950414427	3.34930562264187e-52	9.55724359420858e-48	ACOXL	0	distal
chr2:110993460-110994811:BCL2L11	0.033	0.013	1.83900865473769	0.850997949116357	-0.617083950414427	3.34930562264187e-52	9.55724359420858e-48	BCL2L11	-126103	distal
chr7:24910634-24911595:OSBPL3	0.039	0.017	1.89210321735272	0.893962713199228	-0.61071111361362	3.3749482673323e-52	9.63041488083273e-48	OSBPL3	-18023	distal
chr12:89762345-89763019:ATP2B1	0.034	0.014	1.6480049264592	0.731864322809391	-0.612579894884492	4.15288955790122e-52	1.18502703534711e-47	ATP2B1	-53515	distal
chr15:64872857-64873582:AC069368.3	0.037	0.016	1.96012224224234	0.818988436713811	-0.702520383298243	4.6582234280046e-52	1.32922405518111e-47	AC069368.3	30910	distal
chr1:206757524-206758391:IL10	0.035	0.015	2.25987124947195	0.91725370000216	-0.76577373168188	5.16096978524229e-52	1.47268272821889e-47	IL10	14103	distal
chr2:28444985-28446896:PLB1	0.01	0.026	0.659025130038876	1.97192657656406	0.841062733925931	7.77947777718417e-52	2.2198739837195e-47	PLB1	-49175	distal
chr6:10732907-10733669:TMEM14C	0.036	0.015	2.14756360874098	0.94928648778884	-0.691289393569729	8.58527350198337e-52	2.44980779379095e-47	TMEM14C	9933	distal
chr3:141552470-141553589:RASA2	0.041	0.019	1.92486989316287	0.904464435496229	-0.618987103933594	1.0474840441462e-51	2.98899571997119e-47	RASA2	65387	distal
chr2:223941414-223942329:WDFY1	0.037	0.016	1.9925571933781	0.877248818707503	-0.67275893613316	1.05678175894123e-51	3.01552674913879e-47	WDFY1	3058	distal
chr17:45293251-45294120:MAP3K14	0.019	0.039	0.811054089168579	2.00348907962891	0.729809783743587	1.11899900529105e-51	3.19306366159801e-47	MAP3K14	-2276	distal
chr16:29111705-29112714:LAT	0.04	0.018	2.17681252411468	1.04750241851194	-0.633714797618439	1.20151303606973e-51	3.42851744842497e-47	LAT	126288	distal
chr8:22639165-22640160:BIN3	0.049	0.025	2.12413869955454	1.01851022370091	-0.63016761087682	1.23584532631242e-51	3.52648463863248e-47	BIN3	4644	distal
chr20:13247102-13248265:C20orf82	0.035	0.015	2.30121381202043	0.920677861666509	-0.781381012827527	1.31857538004538e-51	3.76255484695948e-47	C20orf82	25332	distal
chr10:129517514-129518594:MGMT	0.035	0.015	2.1460111392089	0.942781051573552	-0.69540045839174	1.37114498030991e-51	3.91256220131434e-47	MGMT	50331	distal
chr11:86805770-86806654:PRSS23	0.032	0.013	2.12881669698676	0.903416068839614	-0.717026184529138	1.51862864997364e-51	4.3334068526998e-47	PRSS23	5250	distal
chr1:212225238-212226235:PPP2R5A	0.037	0.016	2.08342036224187	0.911511778077556	-0.689817495664508	2.07780335402111e-51	5.92901187069925e-47	PPP2R5A	-59302	distal
chr6:158564451-158565455:TMEM181	0.034	0.015	2.05773389499609	0.86360802105203	-0.714364413934672	2.27955873700863e-51	6.50472085605412e-47	TMEM181	28016	distal
chr18:63216392-63217465:BCL2	0.036	0.016	2.07596748159561	0.898554180767839	-0.696139080502537	3.9162672829005e-51	1.11750686917566e-46	BCL2	101347	distal
chr6:90401913-90403030:BACH2	0.045	0.022	2.04694481402049	0.974419876726717	-0.625934546842625	5.34007880527964e-51	1.52379148708654e-46	BACH2	-105006	distal
chr12:122901080-122902138:VPS37B	0.04	0.018	1.96471407649214	0.934183767434602	-0.61616810255987	6.01048143964483e-51	1.71509087880265e-46	VPS37B	-4637	distal
chr6:37553485-37554203:CCDC167	0.036	0.015	2.08336516909432	0.895374001714381	-0.702023206785954	6.56791103551162e-51	1.87415341398324e-46	CCDC167	-53564	distal
chr16:82653554-82654516:CDH13	0.04	0.019	1.9738149312737	0.897811313951942	-0.647978304827137	8.03640824449846e-51	2.29318909256764e-46	CDH13	26516	distal
chr6:106524850-106526257:AIM1	0.037	0.017	1.98329507650433	0.876288094578002	-0.669025317699106	1.00068947977425e-50	2.85546743053581e-46	AIM1	12996	distal
chr20:53835349-53836008	0.04	0.018	2.02375841292138	0.937900226433142	-0.641848583247374	1.11746552925722e-50	3.18868788773547e-46	---	---	intergenic
chr1:108703287-108704475:FNDC7	0.047	0.024	2.07404725725679	0.989441237034572	-0.627776057547679	1.99187662899808e-50	5.68381996084603e-46	FNDC7	-8182	distal
chr8:130244344-130245512:ASAP1	0.041	0.02	1.97648687633519	0.90359412993836	-0.644884622557347	2.89272938881345e-50	8.25440331097918e-46	ASAP1	198148	distal
chr2:48343691-48344695:FOXN2	0.039	0.017	1.86542216122459	0.902561071087684	-0.590804942053907	3.09266038480204e-50	8.82490640803263e-46	FOXN2	-1522	distal
chr3:174440665-174441675:NLGN1	0.018	0.039	0.942579417962801	1.98074997429607	0.617701785792248	3.22206747290293e-50	9.19416953392851e-46	NLGN1	165352	distal
chr22:46369846-46371475:CELSR1	0.041	0.02	2.01809323502413	0.933973430642811	-0.64206939944472	4.14227565577571e-50	1.1819983583756e-45	CELSR1	0	distal
chr22:46369846-46371475:TRMU	0.041	0.02	2.01809323502413	0.933973430642811	-0.64206939944472	4.14227565577571e-50	1.1819983583756e-45	TRMU	33702	distal
chr3:5002245-5003149:BHLHE40	0.042	0.019	1.95501090029077	0.960409176512275	-0.592008647139592	4.40385121688008e-50	1.25663894473673e-45	BHLHE40	23130	distal
chr7:151727417-151728352:PRKAG2	0.013	0.029	0.719041168306124	2.04900616678398	0.826734972796394	6.34200588168306e-50	1.80969137833826e-45	PRKAG2	7962	distal
chr17:47809985-47810962:OSBPL7	0.042	0.019	2.09510472770291	1.05790541368803	-0.588811552104594	7.43084649569958e-50	2.12039204754788e-45	OSBPL7	10808	distal
chr5:50634655-50635518:PARP8	0.034	0.015	2.123902544297	0.94871810146425	-0.680824039076875	9.05791494858511e-50	2.58467603057876e-45	PARP8	-30381	distal
chr9:110156636-110157519:AKAP2	0.034	0.015	2.05954447730612	0.892041160696708	-0.69337339776978	1.07054935597899e-49	3.05481258728606e-45	AKAP2	31136	distal
chr9:110156636-110157519:PALM2-AKAP2	0.034	0.015	2.05954447730612	0.892041160696708	-0.69337339776978	1.07054935597899e-49	3.05481258728606e-45	PALM2-AKAP2	0	distal
chr4:38509226-38510404:KLF3	0.036	0.016	2.26202428773943	0.955811413428001	-0.738000256821641	1.24442377176949e-49	3.55096323274424e-45	KLF3	-153792	distal
chr21:37224805-37226444:DSCR3	0.044	0.022	1.94629419742897	0.927100589622001	-0.612469617024737	1.36667822098357e-49	3.89981630357662e-45	DSCR3	40902	distal
chr1:100445241-100446246:CDC14A	0.049	0.026	2.08843219301623	1.03194280685754	-0.604014861346909	1.96724148605815e-49	5.61352358046694e-45	CDC14A	0	distal
chr1:100445241-100446246:GPR88	0.049	0.026	2.08843219301623	1.03194280685754	-0.604014861346909	1.96724148605815e-49	5.61352358046694e-45	GPR88	-91891	distal
chr19:17107528-17108658:MYO9B	0.029	0.052	0.961140293678895	1.98128001575732	0.60423914136419	2.72197654198981e-49	7.76716006256793e-45	MYO9B	5873	distal
chr4:1081242-1082852:RNF212	0.017	0.036	0.809930268840503	1.896064714827	0.678159725241875	3.07618897081537e-49	8.77790522822166e-45	RNF212	30674	distal
chrY:14340403-14341309:NLGN4Y	0.028	0.011	1.47191021813275	0.550635984327193	-0.672766294437502	3.25457391670464e-49	9.28692667131669e-45	NLGN4Y	-181443	distal
chr14:72451183-72452070:RGS6	0.038	0.018	2.0726852732183	0.964604376489585	-0.645261185114888	4.84945726144086e-49	1.38379262955215e-44	RGS6	-2450	distal
chr14:65098288-65099067:MAX	0.036	0.016	1.86229025514715	0.862695984823475	-0.619777750594275	4.87375040551049e-49	1.39072467821242e-44	MAX	3272	distal
chr7:115410348-115411471	0.03	0.012	1.91107989794067	0.867789599120144	-0.640222487487392	6.92362562870919e-49	1.97565657315217e-44	---	---	intergenic
chr7:150676279-150677645:GIMAP2	0.041	0.02	2.14337880448874	1.0505562323767	-0.616300832700112	8.44827366041887e-49	2.41071488900052e-44	GIMAP2	-8055	distal
chr7:2413112-2414067:CHST12	0.04	0.018	2.09425247476732	1.02941998190762	-0.608523460866762	1.03975922744008e-48	2.96695295550026e-44	CHST12	9525	distal
chr2:460707-461455:FAM150B	0.05	0.026	2.07804330029664	1.0058056128331	-0.617831729005923	1.05728060120323e-48	3.01695019553342e-44	FAM150B	-172412	distal
chr1:197391161-197392040:CRB1	0.037	0.017	2.22343285344022	0.970492525968813	-0.710041653985859	1.68921745713753e-48	4.82018201394196e-44	CRB1	-21789	distal
chr18:26215387-26216307:TAF4B	0.046	0.024	2.17357646009729	1.06247272055274	-0.621734563918333	2.13314154233166e-48	6.08691939104338e-44	TAF4B	-9629	distal
chr3:52174793-52175528:POC1A	0.011	0.027	0.752930757821136	2.07441204644707	0.8105415248211	2.51597053153846e-48	7.179321911745e-44	POC1A	-20104	distal
chr17:65173254-65174059:RGS9	0.048	0.025	2.04688305451043	1.02515715604183	-0.589300259337673	3.827293942694e-48	1.09211832654773e-43	RGS9	35781	distal
chr10:22505804-22506688:PIP4K2A	0.044	0.022	2.12198719488721	1.03887824838231	-0.614688992593695	4.6549515505184e-48	1.32829042494043e-43	PIP4K2A	85025	distal
chr3:108127124-108127965:CD47	0.053	0.029	2.07072639866391	1.02696603076848	-0.599258062719418	5.8280807778145e-48	1.66304284994937e-43	CD47	-36100	distal
chr5:73387211-73388348:FOXD1	0.034	0.015	2.091566381591	0.890759447643446	-0.70937215551973	6.34414485590931e-48	1.81030173463372e-43	FOXD1	60179	distal
chr3:143170159-143171727:CHST2	0.031	0.013	2.1151352610332	0.899894146396128	-0.713375767008811	7.79448535276124e-48	2.22415639541042e-43	CHST2	50829	distal
chr4:80492591-80493519:C4orf22	0.036	0.017	2.21502432496031	0.948764882880855	-0.722269612115748	8.76121913978676e-48	2.50001388153815e-43	C4orf22	156823	distal
chr5:87399684-87400798:CCNH	0.033	0.014	2.07966587263372	0.943736270501652	-0.663941349808183	9.35894327545214e-48	2.67057446365027e-43	CCNH	10496	distal
chr1:227773938-227774857:SNAP47	0.036	0.016	1.95070306934393	0.894356433110154	-0.63935094199018	1.15708812489388e-47	3.3017509643847e-43	SNAP47	38486	distal
chr16:71855908-71856822:ATXN1L	0.034	0.015	2.05054221483079	0.938283519457868	-0.654286081303432	1.29165516316389e-47	3.68573800808817e-43	ATXN1L	9918	distal
chr1:231460501-231461103:EGLN1	0.036	0.016	1.86355332095049	0.880646239045841	-0.606577972792503	2.12319468419233e-47	6.05853603134282e-43	EGLN1	-35458	distal
chr20:4154769-4155480:SMOX	0.014	0.03	0.786644118997797	2.04746018357135	0.770355078425795	3.22490752499048e-47	9.20227362256034e-43	SMOX	5835	distal
chr14:39228957-39229835:MIA2	0.031	0.013	2.05227964116293	0.884686421787647	-0.695562639103597	3.9885016322134e-47	1.13811894075209e-42	MIA2	-4067	distal
chr14:77593304-77594038:SPTLC2	0.032	0.013	1.85561541923169	0.879026247673932	-0.603816477544698	4.44994334043258e-47	1.26979133219244e-42	SPTLC2	22735	distal
chr2:429471-431026:FAM150B	0.039	0.019	2.0443750780734	0.947129936626346	-0.644796953310947	5.65432160144557e-47	1.61346066897249e-42	FAM150B	-141176	distal
chr16:89696302-89697189:CDK10	0.038	0.018	2.12206007371377	0.938508502748033	-0.687551234376282	5.78523570662057e-47	1.65081700888418e-42	CDK10	0	distal
chr16:89696302-89697189:SPATA2L	0.038	0.018	2.12206007371377	0.938508502748033	-0.687551234376282	5.78523570662057e-47	1.65081700888418e-42	SPATA2L	4506	distal
chr10:70578140-70578912:PRF1	0.037	0.017	1.90140856723741	0.892731225694433	-0.616283907665838	7.25016975275678e-47	2.06883593894915e-42	PRF1	23775	distal
chr13:51821356-51822849:DHRS12	0.045	0.023	1.98498764261761	0.974984281881262	-0.595883787474192	8.0794620709913e-47	2.30547450195737e-42	DHRS12	-17200	distal
chr13:51821356-51822849:RP11-147H23.3	0.045	0.023	1.98498764261761	0.974984281881262	-0.595883787474192	8.0794620709913e-47	2.30547450195737e-42	RP11-147H23.3	0	distal
chr13:51821356-51822849:RP11-327P2.7	0.045	0.023	1.98498764261761	0.974984281881262	-0.595883787474192	8.0794620709913e-47	2.30547450195737e-42	RP11-327P2.7	0	distal
chr5:132437302-132438338:AC116366.7	0.046	0.024	1.97518214635868	0.955497386965512	-0.605442387412423	1.03317049727796e-46	2.94815201398265e-42	AC116366.7	-11314	distal
chr7:127413355-127414664:ZNF800	0.043	0.022	2.03856657452106	1.00474482828228	-0.599972284922431	1.5146100907015e-46	4.32193989381672e-42	ZNF800	-20662	distal
chr5:173283676-173284246:STC2	0.017	0.037	1.05689853082863	2.0929636438636	0.588519249605065	2.13763698006708e-46	6.09974712262141e-42	STC2	45257	distal
chr19:38664114-38665212:ACTN4	0.034	0.015	2.00866110954425	0.889691840775193	-0.670970625245883	2.19014252389854e-46	6.24957169194449e-42	ACTN4	16369	distal
chr16:1458613-1459457:CCDC154	0.013	0.03	0.679783589779633	1.52271028442384	0.586699153028734	2.78818008013568e-46	7.95607185866715e-42	CCDC154	-14058	distal
chr16:1458613-1459457:CLCN7	0.013	0.03	0.679783589779633	1.52271028442384	0.586699153028734	2.78818008013568e-46	7.95607185866715e-42	CLCN7	0	distal
chr10:79298304-79300011:ZMIZ1	0.014	0.03	0.785733923287486	1.9818662193618	0.739698399935965	4.12953781718885e-46	1.17836361613484e-41	ZMIZ1	12852	distal
chrX:78073119-78074107:PGK1	0.044	0.022	2.10080609556737	1.05963897066075	-0.590251839018122	4.7514221389973e-46	1.35581830736288e-41	PGK1	-30067	distal
chrX:15816020-15817420:ZRSR2	0.04	0.019	2.06434243142594	1.02537706969553	-0.597387000004576	4.81163874591541e-46	1.37300111614696e-41	ZRSR2	25549	distal
chr6:85669605-85670333:SYNCRIP	0.039	0.018	1.9819628948198	0.946893918106817	-0.615088029005494	5.1187031596028e-46	1.46062194659266e-41	SYNCRIP	-26321	distal
chr14:91260875-91261834:GPR68	0.034	0.015	1.97597740097682	0.905378577486405	-0.643285897303797	5.50461391405176e-46	1.57074158037467e-41	GPR68	-6951	distal
chr6:44297134-44298039:RP11-444E17.6	0.017	0.036	1.01047174889624	2.08949497984969	0.619836965631214	7.81848361525571e-46	2.23100429961322e-41	RP11-444E17.6	0	distal
chr6:44297134-44298039:TCTE1	0.017	0.036	1.01047174889624	2.08949497984969	0.619836965631214	7.81848361525571e-46	2.23100429961322e-41	TCTE1	0	promoter
chr6:44297134-44298039:TMEM151B	0.017	0.036	1.01047174889624	2.08949497984969	0.619836965631214	7.81848361525571e-46	2.23100429961322e-41	TMEM151B	0	distal
chr17:49817778-49818619:KAT7	0.043	0.022	2.17462203702192	1.04943313497988	-0.631359917034497	8.71750275841575e-46	2.48753941211393e-41	KAT7	28126	distal
chr14:96126199-96127000:BDKRB2	0.038	0.018	2.33787454335782	1.04445375651717	-0.7072142999648	1.0848332513218e-45	3.09557168264675e-41	BDKRB2	-77679	distal
chr2:148524261-148525214:MBD5	0.045	0.024	2.16155793237018	1.05520065691184	-0.621356399204411	1.18202684183278e-45	3.37291359316983e-41	MBD5	65632	distal
chr14:91066922-91069029:RPS6KA5	0.037	0.018	2.17741392216648	1.0314303318307	-0.645357154381441	1.9208543187001e-45	5.48115779841072e-41	RPS6KA5	-6315	distal
chr16:17396644-17397835:XYLT1	0.04	0.02	2.0640923451856	0.962754661754544	-0.642579925991106	1.97189708255483e-45	5.6268083250702e-41	XYLT1	73046	distal
chr11:75275319-75276164:ARRB1	0.047	0.025	2.0842364517435	1.04225700176668	-0.594748943813675	2.13055742592283e-45	6.07954561487079e-41	ARRB1	0	distal
chr11:75275319-75276164:TPBGL	0.047	0.025	2.0842364517435	1.04225700176668	-0.594748943813675	2.13055742592283e-45	6.07954561487079e-41	TPBGL	34415	distal
chr12:122703075-122703742:HCAR2	0.028	0.011	1.80090460684614	0.819641178083042	-0.622238860984099	2.15705907590595e-45	6.15516807309763e-41	HCAR2	0	promoter
chr19:7605258-7606116:CAMSAP3	0.017	0.036	0.959381665187632	2.14114020730098	0.680889894763502	2.30680144425884e-45	6.58245792119261e-41	CAMSAP3	9357	distal
chr19:55626212-55626947:ZNF784	0.038	0.019	2.11793216271837	0.984143725468752	-0.652073005414675	2.97722797658056e-45	8.49552003117261e-41	ZNF784	-1612	distal
chr12:95805614-95806361:NTN4	0.033	0.015	2.0279860894295	0.914129799785127	-0.661669913312507	3.00018798172751e-45	8.56103640585945e-41	NTN4	-14463	distal
chr19:7807381-7808089:EVI5L	0.032	0.014	1.90344266567649	0.853577796409956	-0.647451877701822	3.19691450000096e-45	9.12239552575275e-41	EVI5L	-22144	distal
chr12:10982127-10982793:PRH1	0.035	0.016	2.00895739300384	0.939158908764934	-0.633832644978745	3.60677784600741e-45	1.02919405835822e-40	PRH1	0	distal
chr12:10982127-10982793:PRH1-PRR4	0.035	0.016	2.00895739300384	0.939158908764934	-0.633832644978745	3.60677784600741e-45	1.02919405835822e-40	PRH1-PRR4	0	distal
chr12:10982127-10982793:TAS2R50	0.035	0.016	2.00895739300384	0.939158908764934	-0.633832644978745	3.60677784600741e-45	1.02919405835822e-40	TAS2R50	4119	distal
chr8:28365584-28366350:ZNF395	0.014	0.03	0.713062987522367	1.80001998443048	0.708858925301103	4.73953303562052e-45	1.35242575171432e-40	ZNF395	19047	distal
chr17:32275004-32276765:RHBDL3	0.012	0.027	0.783377127213893	1.99676016254069	0.7487918072651	6.44568925408291e-45	1.83927742865256e-40	RHBDL3	7201	distal
chr11:65791536-65792257:OVOL1	0.03	0.013	1.82750102431649	0.731785051301767	-0.707267672605877	7.40768608951363e-45	2.11378322564271e-40	OVOL1	-1452	distal
chr11:19280835-19281495:E2F8	0.034	0.016	2.03896251974694	0.949826625003573	-0.640233033977331	8.34936490267695e-45	2.38249127497887e-40	E2F8	-39216	distal
chr4:26826578-26827284:STIM2	0.029	0.012	1.81421231018733	0.74918350532145	-0.68604952359322	9.5604895214824e-45	2.728085684955e-40	STIM2	-33407	distal
chr2:100643569-100644750:PDCL3	0.047	0.026	2.26399818977793	1.08745073409192	-0.644898108232766	1.27075491347718e-44	3.62609914560714e-40	PDCL3	80880	distal
chr12:103441278-103442282:C12orf42	0.031	0.014	1.97652358827652	0.8189898145669	-0.710490862801942	2.73676003425263e-44	7.80934475773988e-40	C12orf42	53684	distal
chr6:43798577-43800230:VEGFA	0.013	0.029	0.765499369259761	1.94056682713771	0.736017971787564	3.02910727530026e-44	8.64355761006928e-40	VEGFA	26586	distal
chr3:45976394-45977272:FYCO1	0.032	0.014	2.09946271879777	0.928487792808715	-0.684548137111324	3.85891250926905e-44	1.10114068451992e-39	FYCO1	-17734	distal
chr14:101534896-101536057:DIO3	0.033	0.014	1.9308288364197	0.905811271924525	-0.620903455960404	4.14100475976007e-44	1.18163570819754e-39	DIO3	-25294	distal
chr7:2953870-2955010:CARD11	0.039	0.019	2.05941181994967	1.00983304593876	-0.606178653929138	5.44485448661793e-44	1.55368922775643e-39	CARD11	88935	distal
chr2:217901936-217903394:TNS1	0.022	0.041	0.934901556844322	2.01035258366091	0.637672303306247	6.17750955574024e-44	1.76275235173048e-39	TNS1	419	distal
chr10:7192686-7193916:SFMBT2	0.045	0.024	2.15374733440893	1.0540003309242	-0.618630667724517	1.16333981119095e-43	3.31959015123338e-39	SFMBT2	0	distal
chr1:94602188-94602918:F3	0.03	0.013	1.94494557985497	0.877731562719464	-0.649250141971309	1.41947942216432e-43	4.05048453114589e-39	F3	-60389	distal
chr1:202203420-202204654:LGR6	0.034	0.016	1.98619885494434	0.968196098434131	-0.601436270930569	1.77748491573582e-43	5.07205320705216e-39	LGR6	0	promoter
chr19:49435225-49436751:SLC17A7	0.018	0.037	0.992370242470886	2.0811487790149	0.628982578717528	2.06130925975329e-43	5.88194597270601e-39	SLC17A7	4800	distal
chr14:50095684-50096646:VCPKMT	0.032	0.015	2.10005246534211	0.95532357457835	-0.664885261805977	2.17948129756946e-43	6.21914988261446e-39	VCPKMT	19911	distal
chr22:37604774-37605554:GGA1	0.04	0.02	2.08905621085427	0.989561318635763	-0.634715759762285	3.98083445821218e-43	1.13593111265084e-38	GGA1	-2921	distal
chr6:14123484-14124260:CD83	0.032	0.014	1.79823084632191	0.828042153700966	-0.614215647194829	5.56323278310392e-43	1.5874684746587e-38	CD83	5844	distal
chr6:16651600-16652399:ATXN1	0.039	0.019	1.93132008334467	0.939751820294222	-0.595678430683151	5.86220490256576e-43	1.67278016894714e-38	ATXN1	109057	distal
chr4:101327901-101328792:PPP3CA	0.037	0.018	1.99871281857571	0.963675539058291	-0.610786793707309	7.41267016800319e-43	2.11520543243971e-38	PPP3CA	18050	distal
chr4:108107021-108108574:LEF1	0.037	0.018	2.22875596619173	0.994257009857305	-0.695127055170247	9.03788581488604e-43	2.57896071727773e-38	LEF1	57727	distal
chr2:239625438-239626594	0.034	0.016	2.14059182429623	0.996850928573413	-0.653309816404428	1.02946860887452e-42	2.93758867542346e-38	---	---	intergenic
chr3:194586733-194587921:TMEM44	0.013	0.028	0.813332681168624	2.16085748870437	0.801672359071173	1.31499038154561e-42	3.75232505374041e-38	TMEM44	45360	distal
chr5:55061900-55062852:GZMK	0.032	0.014	1.93839501578322	0.937976861173384	-0.600477008493947	1.63462241009573e-42	4.66439504720817e-38	GZMK	37648	distal
chr1:228478822-228479792:RNF187	0.03	0.013	1.85424949522814	0.830342001498304	-0.640998206050838	1.68945715656315e-42	4.82086599625296e-38	RNF187	-7269	distal
chr7:6990929-6991770:CCZ1B	0.05	0.029	2.09311923400825	1.05011254600024	-0.59335933549822	1.90483867486248e-42	5.4354571587201e-38	CCZ1B	-164160	distal
chr2:218166598-218167279:CXCR1	0.037	0.018	2.05785811116771	1.02123642367197	-0.59728338183765	2.03400933377329e-42	5.80404563392208e-38	CXCR1	0	promoter
chr9:113520040-113520823:RGS3	0.038	0.019	2.07707026703438	1.02327980838807	-0.604861538565015	2.67836114638857e-42	7.6427035312198e-38	RGS3	14779	distal
chr22:37303596-37304829:CYTH4	0.025	0.045	0.934927734333736	1.91742630223833	0.592416526536714	2.86014179152684e-42	8.16141460212185e-38	CYTH4	21110	distal
chr10:1062904-1063909:WDR37	0.037	0.018	2.07490518996893	1.01918191524801	-0.606771033798214	2.86173146959843e-42	8.16595074849912e-38	WDR37	6047	distal
chr2:191570303-191571862:NABP1	0.029	0.012	2.00888944086993	0.864752984644376	-0.69024656114095	2.92432750455539e-42	8.34456853424881e-38	NABP1	-106274	distal
chr16:3072194-3073357:IL32	0.04	0.02	2.12089516555685	1.04915105590403	-0.606933557833243	2.96453008765653e-42	8.45928660512792e-38	IL32	6383	distal
chr22:49983112-49984179:PIM3	0.015	0.033	0.937629075549907	1.98370485560415	0.622812414033161	4.1400333936957e-42	1.18135852889107e-37	PIM3	22600	distal
chr12:14403498-14404266:ATF7IP	0.031	0.014	1.90305251825292	0.844241192840572	-0.654543325471506	5.47721321956499e-42	1.56292279220287e-37	ATF7IP	18435	distal
chr18:5309865-5310710:ZBTB14	0.039	0.02	1.99500099676561	0.986005669125247	-0.592686742059645	5.77110288523879e-42	1.64678420830289e-37	ZBTB14	-12813	distal
chr6:36114792-36115697:MAPK13	0.033	0.015	1.93798657351477	0.898335584064809	-0.630092751126872	6.75109013161571e-42	1.92642356905654e-37	MAPK13	-14624	distal
chr9:99012880-99014099:COL15A1	0.034	0.016	2.16173558051361	1.03623698610813	-0.634811240236969	7.52019237689111e-42	2.14588689474588e-37	COL15A1	69168	distal
chr1:24856805-24858064:RUNX3	0.033	0.015	1.9830982766479	0.939639775386367	-0.621022763409176	1.06364473633463e-41	3.03511025513088e-37	RUNX3	71813	distal
chr20:23151897-23152963:CD93	0.014	0.03	0.766685835514107	1.75528369875827	0.641155361517757	2.20460046739961e-41	6.29082743372477e-37	CD93	-65558	distal
chr1:151904937-151906114:THEM4	0.042	0.022	2.1526670610232	1.07858739814142	-0.600969411455159	2.67519914968824e-41	7.63368077363539e-37	THEM4	3523	distal
chr1:84862638-84863338:LPAR3	0.032	0.015	2.08940943725109	1.01019367591561	-0.61999657570554	5.31266088757768e-41	1.51596778427029e-36	LPAR3	2821	distal
chr3:69058172-69059106:TMF1	0.034	0.016	1.88121592545095	0.853474193549825	-0.636445755443512	9.68485946002859e-41	2.76357464691916e-36	TMF1	-5834	distal
chr3:69058172-69059106:UBA3	0.034	0.016	1.88121592545095	0.853474193549825	-0.636445755443512	9.68485946002859e-41	2.76357464691916e-36	UBA3	0	distal
chr21:8214416-8215093	0.018	0.036	1.1588798837757	2.36606200405544	0.64077877525104	1.18740290545037e-40	3.38825419070262e-36	---	---	intergenic
chr19:39828160-39829042:DYRK1B	0.035	0.017	2.02879446544666	0.989989216730044	-0.605983066727455	1.53898180446105e-40	4.3914845790296e-36	DYRK1B	2825	distal
chr7:1986412-1987264:MAD1L1	0.038	0.02	2.12077570386993	1.04645124941355	-0.608780372434331	1.66400271052269e-40	4.7482317344765e-36	MAD1L1	0	distal
chr19:9866008-9866766:OLFM2	0.036	0.018	2.18483894520365	1.01159363554927	-0.662881524359056	1.73435287551599e-40	4.94897593028487e-36	OLFM2	-7841	distal
chr19:2307453-2309306:LINGO3	0.018	0.036	0.951762054363787	1.93544704276803	0.588803049839418	1.96611129174282e-40	5.61029857098814e-36	LINGO3	-15430	distal
chr19:2307453-2309306:LLfos-48D6.2	0.018	0.036	0.951762054363787	1.93544704276803	0.588803049839418	1.96611129174282e-40	5.61029857098814e-36	LLfos-48D6.2	0	distal
chr10:14506813-14508310:FAM107B	0.043	0.024	2.19247720918389	1.02742083639135	-0.655030737284173	3.00400959241988e-40	8.57194137197012e-36	FAM107B	40360	distal
chr9:76023590-76024601:PCSK5	0.036	0.018	2.33687908078576	1.11681199284276	-0.656606267841521	7.20524212801727e-40	2.05601584122973e-35	PCSK5	132886	distal
chr19:15514546-15515372:CYP4F22	0.037	0.018	2.01508090635313	1.00492017754667	-0.588651916368194	7.33000216171891e-40	2.09161611684649e-35	CYP4F22	6054	distal
chr17:6936264-6937276:ALOX12	0.032	0.015	2.04626306401611	0.929785271989688	-0.658600205868775	7.4581260466339e-40	2.12817626740698e-35	ALOX12	-58789	distal
chr10:97355543-97357025:FRAT2	0.035	0.017	1.99866108371981	0.955582598404202	-0.616720001559332	7.5036188184308e-40	2.14115762983923e-35	FRAT2	-20835	distal
chr10:97355543-97357025:RRP12	0.035	0.017	1.99866108371981	0.955582598404202	-0.616720001559332	7.5036188184308e-40	2.14115762983923e-35	RRP12	0	distal
chr7:101100016-101100775:TRIM56	0.012	0.026	0.77475648592048	1.91146122560598	0.714122319089757	9.06362419434141e-40	2.58630516385532e-35	TRIM56	14578	distal
chr4:15754059-15754819:CD38	0.037	0.019	2.04278268877407	1.00558143686527	-0.601370754156995	1.2539033555398e-39	3.57801322503282e-35	CD38	-23459	distal
chr16:17224652-17225386:XYLT1	0.031	0.014	1.98053063958195	0.972455306397385	-0.595576593383924	1.30768995630808e-39	3.73149329032512e-35	XYLT1	0	distal
chr2:7437090-7439267	0.033	0.015	2.02637809610609	0.989274384706779	-0.605349956011777	2.32271044595416e-39	6.62785425753019e-35	---	---	intergenic
chr7:140315957-140316848:SLC37A3	0.017	0.033	0.873061757679658	1.97820849243882	0.669046286549229	2.52040090028028e-39	7.19196396894979e-35	SLC37A3	81609	distal
chr12:121614769-121615547:ORAI1	0.033	0.016	2.02465247596316	0.98606773075103	-0.606854566469584	2.54178726421331e-39	7.25298995843269e-35	ORAI1	-11003	distal
chr4:168449956-168452208:DDX60L	0.014	0.028	0.699317057500372	1.76055291891691	0.700002202633895	2.57345711369405e-39	7.34335987392598e-35	DDX60L	28279	distal
chr3:56790101-56791194:ARHGEF3	0.034	0.017	1.91947271847796	0.93530206938506	-0.59314906434605	4.83145754305546e-39	1.37865640991087e-34	ARHGEF3	10755	distal
chr16:89025897-89026645:CBFA2T3	0.035	0.018	1.93745055081685	0.955898456770414	-0.5867330928001	6.83361390139619e-39	1.9499717267634e-34	CBFA2T3	-48694	distal
chr17:42271595-42273057:STAT5B	0.03	0.013	1.85094114601885	0.899774791944761	-0.585609852039502	7.9474381382325e-39	2.26780147274464e-34	STAT5B	3349	distal
chr2:143068302-143068991:ARHGAP15	0.026	0.011	1.65472004614783	0.758983898534603	-0.593817452791237	8.08518162619798e-39	2.30710657703559e-34	ARHGAP15	-22371	distal
chr14:106170088-106170678:IGHV3-16	0.017	0.033	0.973819815180535	1.9923361173423	0.600281940615592	2.15824988918699e-38	6.15856605879508e-34	IGHV3-16	-4359	distal
chr3:170277017-170278207:PRKCI	0.036	0.018	2.07300376746004	1.00142530580266	-0.618621761029273	2.66991740436419e-38	7.61860931335322e-34	PRKCI	54653	distal
chr19:55447344-55449751:SHISA7	0.015	0.031	0.950215574973774	2.04222672270048	0.641494067347951	3.67090024721357e-38	1.04749138554239e-33	SHISA7	-4482	distal
chr16:27199581-27200346:KDM8	0.031	0.014	1.92836506923253	0.916687073371029	-0.611480605084154	3.94917030589597e-38	1.12689574678742e-33	KDM8	-3149	distal
chr10:132248851-132249713:DPYSL4	0.018	0.036	1.08422238762488	2.13387273867439	0.588437373420403	4.05848807689367e-38	1.15808957274161e-33	DPYSL4	56092	distal
chr10:132248851-132249713:STK32C	0.018	0.036	1.08422238762488	2.13387273867439	0.588437373420403	4.05848807689367e-38	1.15808957274161e-33	STK32C	0	distal
chr3:189355448-189356332:TPRG1	0.031	0.015	2.01876415371731	0.951532232336342	-0.629350757016895	6.56165574232898e-38	1.87236846607357e-33	TPRG1	183475	distal
chr2:28347664-28348624:FOSL2	0.038	0.02	1.9409099017093	0.95334092002045	-0.590318818915638	6.56508652022857e-38	1.87334743854722e-33	FOSL2	-44178	distal
chr20:5736971-5738030:C20orf196	0.039	0.021	2.02465895375664	1.00163376123132	-0.595594451561316	7.03746277811346e-38	2.00814000373468e-33	C20orf196	-12363	distal
chr20:62320568-62321998:ADRM1	0.015	0.031	0.957520111639322	1.99414656127602	0.613117712089283	1.100286582565e-37	3.13966776334924e-33	ADRM1	17673	distal
chr20:62320568-62321998:LAMA5	0.015	0.031	0.957520111639322	1.99414656127602	0.613117712089283	1.100286582565e-37	3.13966776334924e-33	LAMA5	0	distal
chr6:85461063-85462398:NT5E	0.031	0.015	1.99770534431786	0.950695143519027	-0.61987025253913	1.8451288262978e-37	5.26507510584078e-33	NT5E	10973	distal
chr10:96229461-96229969:BLNK	0.016	0.032	0.930694528465174	1.99568322971746	0.633765156701485	2.45910664543156e-37	7.01706081273895e-33	BLNK	41429	distal
chr3:13233795-13235447:IQSEC1	0.03	0.014	1.93100837637855	0.88223296373637	-0.638951889736726	2.64053411875394e-37	7.53476410786438e-33	IQSEC1	-160679	distal
chr7:139680604-139681305:HIPK2	0.015	0.03	0.836137460943423	1.86618978210562	0.642460070490436	2.67143069203402e-37	7.62292747971909e-33	HIPK2	35708	distal
chr11:110327943-110328860:RDX	0.029	0.014	1.85620872898883	0.810669764440224	-0.657577966896813	3.02595363377388e-37	8.63455869397377e-33	RDX	-31222	distal
chr16:18767028-18767669:RPS15A	0.033	0.016	1.9345134230766	0.921527871120869	-0.610867404955562	3.57302513631422e-37	1.01956272264726e-32	RPS15A	21450	distal
chr7:5641807-5642471:FSCN1	0.03	0.014	1.82688848747148	0.875086488343887	-0.59225783273208	3.67103037862519e-37	1.0475285185407e-32	FSCN1	48985	distal
chr7:5641807-5642471:RNF216	0.03	0.014	1.82688848747148	0.875086488343887	-0.59225783273208	3.67103037862519e-37	1.0475285185407e-32	RNF216	0	distal
chr4:142354822-142355723:INPP4B	0.034	0.018	2.13665792163798	1.00245722409135	-0.647456775460941	4.79848265888667e-37	1.36924702671331e-32	INPP4B	75536	distal
chr15:83446838-83447936:SH3GL3	0.014	0.029	0.876680930771085	1.89213169681291	0.623949861567107	5.29999789599166e-37	1.51235439962122e-32	SH3GL3	0	promoter
chr17:65537716-65538916:AXIN2	0.017	0.034	1.08736708124226	2.14226337000082	0.590119772740396	5.48932765339775e-37	1.56637964589705e-32	AXIN2	19813	distal
chr17:65537716-65538916:CTD-2535L24.2	0.017	0.034	1.08736708124226	2.14226337000082	0.590119772740396	5.48932765339775e-37	1.56637964589705e-32	CTD-2535L24.2	0	distal
chr10:26721387-26722101:PDSS1	0.032	0.015	1.95007433400487	0.948004212830326	-0.598754509547077	6.73752763011994e-37	1.92255350925473e-32	PDSS1	23729	distal
chr22:37590226-37590943:LGALS2	0.027	0.012	1.8899584119982	0.910805765777411	-0.596867596543723	8.12248690759688e-37	2.31775163908277e-32	LGALS2	-10147	distal
chr8:125930194-125931301	0.031	0.015	1.9843918230183	0.918996255745287	-0.637085063913659	9.14014191084861e-37	2.60813949426065e-32	---	---	intergenic
chr16:1303600-1304832:UBE2I	0.014	0.029	0.819558991053955	1.79103969898555	0.617213820184297	1.34214220023083e-36	3.82980276835869e-32	UBE2I	-4048	distal
chr1:229253121-229254048:TMEM78	0.033	0.016	1.94698153392102	0.9492936633815	-0.596286569747248	1.9656821029049e-36	5.60907388063912e-32	TMEM78	3486	distal
chr8:125514523-125515315:TRIB1	0.03	0.014	1.98764762123708	0.962118610283628	-0.606597743908213	1.98864213294348e-36	5.67459032635421e-32	TRIB1	80978	distal
chr17:1871598-1872367:RPA1	0.036	0.019	2.28043464922005	1.07820251484947	-0.658550733350661	3.96573879637912e-36	1.13162356554678e-31	RPA1	41615	distal
chr13:97226697-97227605:MBNL2	0.031	0.015	2.01632862926446	0.922937941855428	-0.64948141496292	4.77838677120135e-36	1.3635126651623e-31	MBNL2	4343	distal
chr4:153643170-153643858:TLR2	0.031	0.015	1.98298231851483	0.978352528408078	-0.592455899150246	5.15751547381987e-36	1.4716970404545e-31	TLR2	-40407	distal
chr12:6345211-6346306:TNFRSF1A	0.019	0.035	0.84890001166025	1.844295729734	0.621404267934	5.99535685009896e-36	1.71077507717574e-31	TNFRSF1A	-3098	distal
chr22:28673952-28674635:TTC28	0.031	0.015	1.99453852485712	0.983885180318769	-0.594005162291044	6.9498209172163e-36	1.98313139872767e-31	TTC28	5230	distal
chr5:157099980-157100872:HAVCR2	0.012	0.025	0.68906520250098	1.77198938593901	0.714696712188909	7.49986273589551e-36	2.14008583168778e-31	HAVCR2	8250	distal
chr4:108112947-108113972:LEF1	0.037	0.02	2.26982666200866	1.03510040976214	-0.684114181171857	2.33932877653452e-35	6.67527466384127e-31	LEF1	52329	distal
chr15:93047513-93048251:RGMA	0.032	0.016	2.04778172665415	0.974138335590087	-0.626536496251228	3.9924355593747e-35	1.13924148686757e-30	RGMA	24894	distal
chr11:83117213-83117957:PCF11	0.029	0.014	1.92112386873257	0.934583343208329	-0.594500653759252	6.97651374213219e-35	1.99074819631742e-30	PCF11	-39031	distal
chr3:108834519-108835682:TRAT1	0.032	0.017	2.11944230197244	1.00366220727696	-0.638648816758546	7.9951767977363e-35	2.28142369923405e-30	TRAT1	11748	distal
chr3:183370459-183371869:MCF2L2	0.009	0.022	0.653143912394928	1.72629910999416	0.721731530857743	9.84173896286434e-35	2.80834021305334e-30	MCF2L2	56108	distal
chr22:30649171-30649994:SLC35E4	0.019	0.035	0.951957466986886	1.94638437882645	0.594024036452022	1.11433688133419e-34	3.17976029088712e-30	SLC35E4	12849	distal
chr15:55276922-55277862:RAB27A	0.031	0.015	1.88476906612405	0.899528068991596	-0.602814801087355	1.1880187122185e-34	3.39001139531549e-30	RAB27A	-6014	distal
chr2:191739854-191740577:NABP1	0.032	0.016	2.02904623670607	0.998129789089491	-0.600213303397539	1.36601644294539e-34	3.89792791994467e-30	NABP1	61323	distal
chr1:224379932-224380645:CNIH4	0.029	0.014	1.95249706749023	0.943183033017139	-0.603513828504496	3.61280122706331e-34	1.03091283014252e-29	CNIH4	23040	distal
chr1:23727259-23728955:ELOA	0.027	0.012	1.62490019500719	0.722599044843794	-0.607675632674841	6.13328919473756e-34	1.75013407171836e-29	ELOA	-14200	distal
chr15:58484572-58485623:LIPC	0.031	0.016	2.04246237893879	1.00225512876177	-0.603613608537197	1.11018628616642e-33	3.16791656757588e-29	LIPC	52582	distal
chr1:116537205-116539027:CD58	0.017	0.031	0.791264296187695	1.7565556606808	0.621888514014124	3.20761616117288e-33	9.15293271590681e-29	CD58	31999	distal
chr6:135102781-135103669:HBS1L	0.033	0.017	2.14409762787531	1.02597128025527	-0.634032292703985	3.92711900687295e-33	1.1206034086112e-28	HBS1L	-47884	distal
chr1:100452501-100453117:CDC14A	0.03	0.015	1.99195267706345	0.981689648610619	-0.594356316182496	4.36348155162039e-33	1.24511946075488e-28	CDC14A	0	distal
chr1:100452501-100453117:GPR88	0.03	0.015	1.99195267706345	0.981689648610619	-0.594356316182496	4.36348155162039e-33	1.24511946075488e-28	GPR88	-85020	distal
chr19:17721095-17722368:MAP1S	0.016	0.031	0.906819520842052	1.9825904506676	0.645397590040528	1.11854077226248e-32	3.19175609365099e-28	MAP1S	940	distal
chr10:32139229-32140124:KIF5B	0.013	0.026	0.839311235596269	1.87878872781309	0.646296291120254	1.86216428858456e-32	5.31368579747603e-28	KIF5B	-82799	distal
chr16:68275477-68276417:SLC7A6	0.04	0.023	2.11391712436567	1.06154046316054	-0.595007769994442	6.18046924223448e-32	1.76359689827161e-27	SLC7A6	10918	distal
chr7:142711632-142712717:TRBV27	0.03	0.016	2.09436935344382	1.01470275121239	-0.61907841202838	1.07227800232115e-31	3.05974527962339e-27	TRBV27	-2629	distal
chr10:99534926-99535864:NKX2-3	0.015	0.029	0.961926235420225	1.95544320112628	0.591103694500681	1.16815133351165e-31	3.3333198301755e-27	NKX2-3	1974	distal
chr19:34996830-34998240:GRAMD1A	0.035	0.019	2.17813131404666	1.08619157334908	-0.607307089695313	1.1946428043951e-31	3.40891324234141e-27	GRAMD1A	-2047	distal
chr19:34996830-34998240:GRAMD1A	0.035	0.019	2.17813131404666	1.08619157334908	-0.607307089695313	1.1946428043951e-31	3.40891324234141e-27	GRAMD1A	2047	distal
chr8:81130178-81131419:PAG1	0.028	0.014	1.96718885922015	0.927494201829981	-0.622370235817064	1.4092194791076e-31	4.02120778363352e-27	PAG1	-18111	distal
chr5:77155215-77155942:CTC-337B15.3	0.032	0.018	2.2625848728087	1.03886829292523	-0.678246849440953	5.7537400217696e-31	1.64182971521196e-26	CTC-337B15.3	0	distal
chr5:77155215-77155942:PDE8B	0.032	0.018	2.2625848728087	1.03886829292523	-0.678246849440953	5.7537400217696e-31	1.64182971521196e-26	PDE8B	-54939	distal
chr5:175652746-175653689:HRH2	0.032	0.017	2.00278524318185	0.96707376491225	-0.610250238744601	1.65490603761465e-30	4.7222743783334e-26	HRH2	-4341	distal
chr9:101569940-101570752:GRIN3A	0.034	0.019	2.30291414958058	1.1939215818274	-0.590227511246059	1.0805255888228e-29	3.08327976770585e-25	GRIN3A	0	distal
chr9:101569940-101570752:PPP3R2	0.034	0.019	2.30291414958058	1.1939215818274	-0.590227511246059	1.0805255888228e-29	3.08327976770585e-25	PPP3R2	24249	distal
chr2:44100167-44101184:PPM1B	0.013	0.025	0.804946232305267	1.81535780781646	0.641362426927653	2.61862460546876e-29	7.47224531170512e-25	PPM1B	-67693	distal
chr17:77875754-77876461:TNRC6C	0.012	0.024	0.788713895481748	1.74083156412587	0.615691024091594	1.017184807257e-28	2.90253684750785e-24	TNRC6C	-82779	distal
chr15:101199355-101200266:CHSY1	0.012	0.023	0.796108927683022	1.88352541044263	0.682958888781061	2.18892414043259e-28	6.24609503472439e-24	CHSY1	51666	distal
chr20:2314359-2315606:TGM3	0.014	0.026	0.842936473612804	1.87748537248991	0.642802252689174	5.450848590966e-28	1.55539964543215e-23	TGM3	18359	distal
chr3:113005419-113006481:C3orf17	0.03	0.017	2.15199114869874	1.09339814552383	-0.59041675815074	1.78102513702672e-27	5.08215522850575e-23	C3orf17	13252	distal
chr6:111113442-111114578:SLC16A10	0.016	0.028	0.854049850520925	1.85285260484126	0.621725175969293	3.41466616207028e-27	9.74374989346755e-23	SLC16A10	25865	distal
chr15:28890362-28891524:APBA2	0.031	0.018	2.18516903004838	1.09321943158251	-0.605646378404671	3.7081149350024e-27	1.05811059670294e-22	APBA2	4341	distal
chr12:96176528-96177573:ELK3	0.017	0.029	0.916402093715989	1.90616860747141	0.600718111616414	2.19300655987876e-25	6.25774421861403e-21	ELK3	-16809	distal
chr1:629708-631191:OR4F16	0.026	0.039	1.15777461906634	2.30186768285228	0.613738125398595	2.98349342078537e-22	8.51339847621107e-18	OR4F16	55482	distal
